# Supplementary material
Source: PubMed Central journal article supplement (PMC3601604)
Supplement: jo3027774_si_001.pdf [file jo3027774_si_001.pdf]

Supporting Information for

## Regioselective Opening of *Myo*-Inositol Orthoesters: Mechanism and Synthetic Utility

Himali Y. Godage,<sup>†</sup> Andrew M. Riley,<sup>†</sup> Timothy J. Woodman,<sup>†</sup> Mark P. Thomas,<sup>†</sup> Mary F. Mahon,<sup>‡</sup> Barry V. L. Potter<sup>†\*</sup>

<sup>†</sup>Wolfson Laboratory of Medicinal Chemistry, Department of Pharmacy and Pharmacology, University of Bath, Bath, BA2 7AY, UK

<sup>‡</sup>X-Ray Crystallographic Suite, Department of Chemistry, University of Bath, Bath, BA2 7AY, UK

### Table of Contents

|          |                                                                                                                                                                                                                 |     |
|----------|-----------------------------------------------------------------------------------------------------------------------------------------------------------------------------------------------------------------|-----|
| Figure 1 | Stack plot of the <sup>1</sup> H NMR spectrum of orthoacetate <b>2</b>                                                                                                                                          | S3  |
| Figure 2 | Stack plot of the <sup>2</sup> H NMR spectrum of orthoacetate <b>2</b>                                                                                                                                          | S4  |
| Figure 3 | Proton NMR of the 1,2-bridged intermediate (±)- <b>15</b> and product <b>6</b>                                                                                                                                  | S5  |
| Figure 4 | <sup>13</sup> C NMR spectrum of the 1,2-bridged intermediate (±)- <b>15</b> and product <b>6</b>                                                                                                                | S6  |
| Figure 5 | (A) Proton NMR of starting material <i>myo</i> -inositol 4,6-di-O-Me 1,3,5-orthobenzoate <b>16</b><br>(B) Proton NMR of the 1,2-bridged intermediate (±)- <b>17</b> with very small amount of product <b>18</b> | S7  |
| Figure 6 | (A) Carbon NMR of starting material <i>myo</i> -inositol 4,6-di-O-Me 1,3,5-orthobenzoate <b>16</b><br>(B) Carbon NMR of the 1,2-bridged intermediate (±)- <b>17</b> with very small amount of product <b>18</b> | S8  |
| Figure 7 | Comparison of <sup>1</sup> H NMR spectrum of <b>24</b> (A) in CDCl <sub>3</sub> and (B) in CF <sub>3</sub> CO <sub>2</sub> D and CDCl <sub>3</sub>                                                              | S9  |
| Figure 8 | Comparison of <sup>13</sup> C NMR spectrum of <b>24</b> (A) in CDCl <sub>3</sub> and (B) in CF <sub>3</sub> CO <sub>2</sub> D and CDCl <sub>3</sub>                                                             | S10 |
| Figure 9 | Comparison of <sup>1</sup> H NMR spectrum of <b>25</b> (A) in CDCl <sub>3</sub> and (B) in CF <sub>3</sub> CO <sub>2</sub> D                                                                                    | S11 |

|                                                                                                                                      |           |
|--------------------------------------------------------------------------------------------------------------------------------------|-----------|
| Figure 10 Comparison of $^{13}\text{C}$ NMR spectrum of <b>25</b> (A) in $\text{CDCl}_3$ and (B) in $\text{CF}_3\text{CO}_2\text{D}$ | S12       |
| $^1\text{H}$ & $^{13}\text{C}$ NMR Spectra of Compound <b>15</b> (see Figure 3 & Figure 4)                                           | S5 - S6   |
| $^1\text{H}$ & $^{13}\text{C}$ NMR Spectra of Compound <b>22</b>                                                                     | S13 - S14 |
| $^1\text{H}$ & $^{13}\text{C}$ NMR Spectra of Compound <b>23</b>                                                                     | S15 - S16 |
| $^1\text{H}$ & $^{13}\text{C}$ NMR Spectra of Compound <b>16</b> (see Figure 5A & Figure 6A)                                         | S7 - S8   |
| $^1\text{H}$ & $^{13}\text{C}$ NMR Spectra of Compound <b>17</b> (see Figure 5B & Figure 6B)                                         | S7 - S8   |
| $^1\text{H}$ & $^{13}\text{C}$ NMR Spectra of Compound <b>19</b>                                                                     | S17 - S18 |
| $^1\text{H}$ & $^{13}\text{C}$ NMR Spectra of Compound <b>20</b> & <b>21</b>                                                         | S19 - S20 |
| $^1\text{H}$ & $^{13}\text{C}$ NMR Spectra of Compound <b>24</b> (see Figure 7 & Figure 8)                                           | S9 - S10  |
| $^1\text{H}$ & $^{13}\text{C}$ NMR Spectra of Compound <b>25</b> (see Figure 9 & Figure 10)                                          | S11- S12  |
| $^1\text{H}$ & $^{13}\text{C}$ NMR Spectra of Compound <b>31</b>                                                                     | S21 - S22 |
| $^1\text{H}$ & $^{13}\text{C}$ NMR Spectra of Compound <b>4</b>                                                                      | S23 - S24 |
| $^1\text{H}$ & $^{13}\text{C}$ NMR Spectra of Compound <b>7</b>                                                                      | S25 - S26 |
| $^1\text{H}$ , $^2\text{H}$ & $^{13}\text{C}$ NMR Spectra of Compound <b>44</b>                                                      | S27 - S29 |
| $^1\text{H}$ , $^{31}\text{P}$ & $^{13}\text{C}$ NMR Spectra of Compound <b>47</b>                                                   | S30 - S32 |
| $^1\text{H}$ , $^{31}\text{P}$ & $^{13}\text{C}$ NMR Spectra of Compound <b>48</b>                                                   | S33 - S35 |
| $^1\text{H}$ , $^{31}\text{P}$ & $^{13}\text{C}$ NMR Spectra of Compound <b>9</b>                                                    | S36 - S38 |
| X-ray Crystallographic data for Compound <b>7</b>                                                                                    | S39 - S47 |
| Computational Data for Compound <b>20</b>                                                                                            | S48 - S53 |

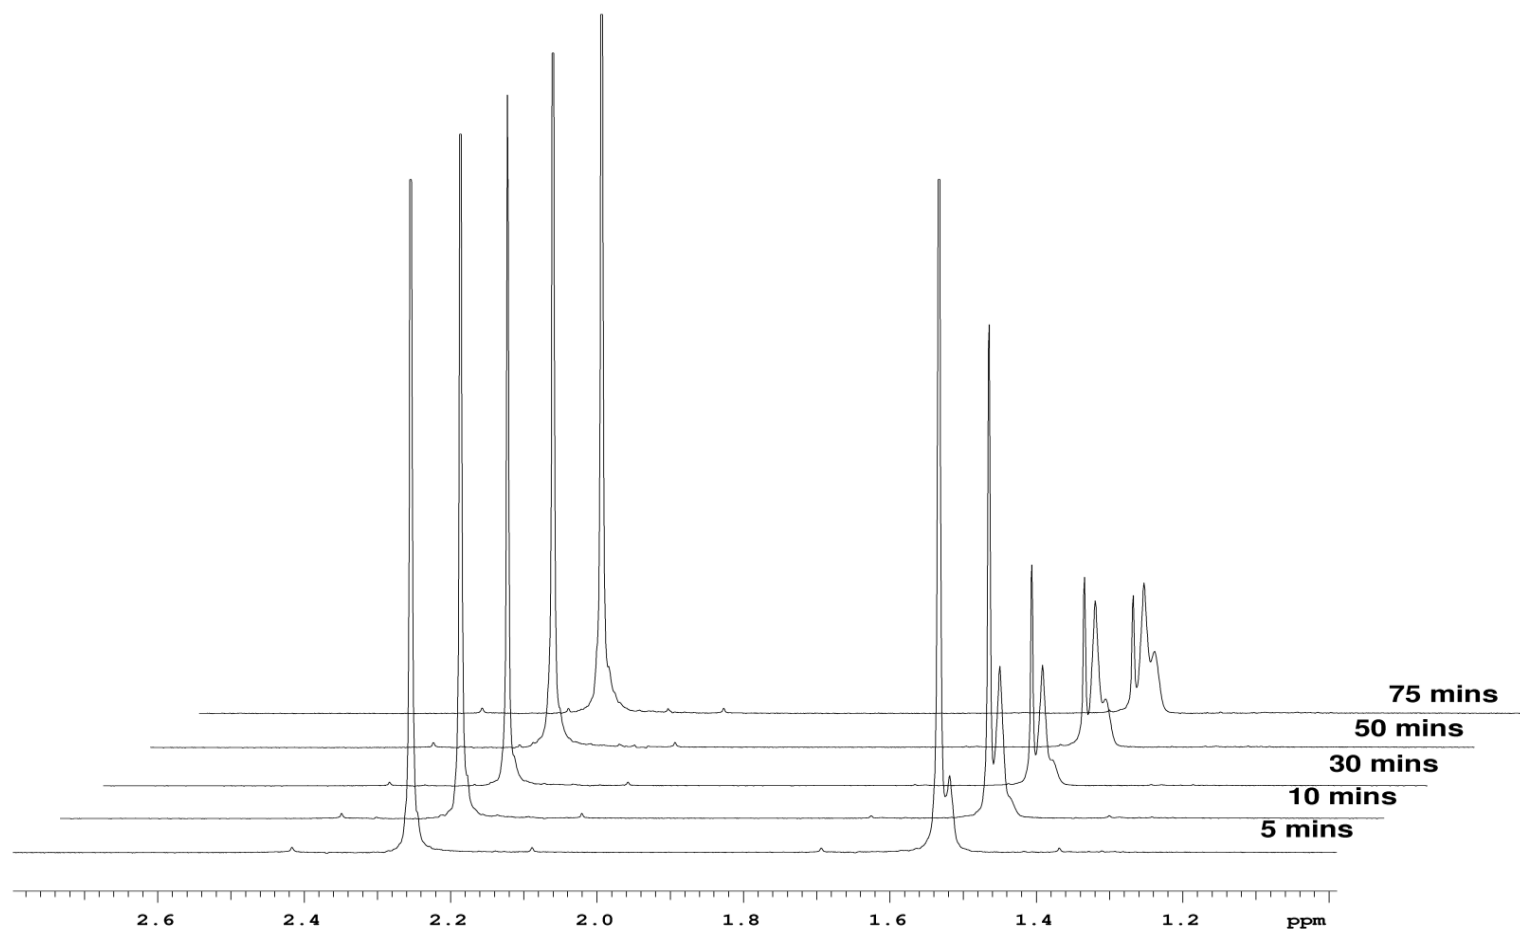

**Figure 1** Stack plot of the  $^1\text{H}$  NMR spectrum of orthoacetate **2** in  $d\text{-TFA}/d\text{-CHCl}_3$  over 3 h

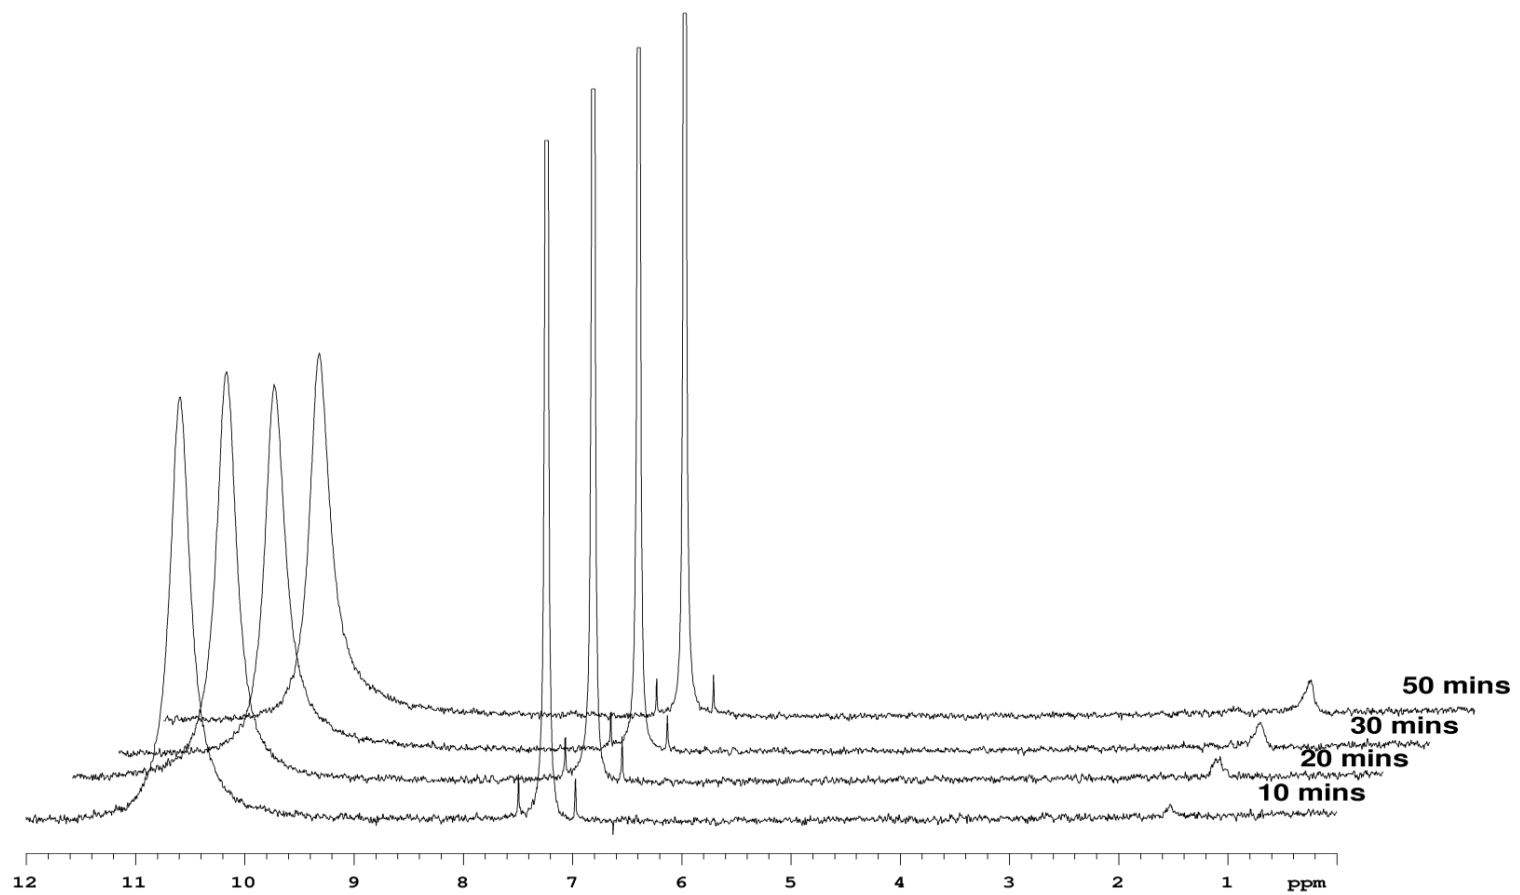

**Figure 2** Stack plot of the  $^2\text{H}$  NMR spectrum of orthoacetate **2** in  $d\text{-TFA}/d\text{-CHCl}_3$  over 50 mins

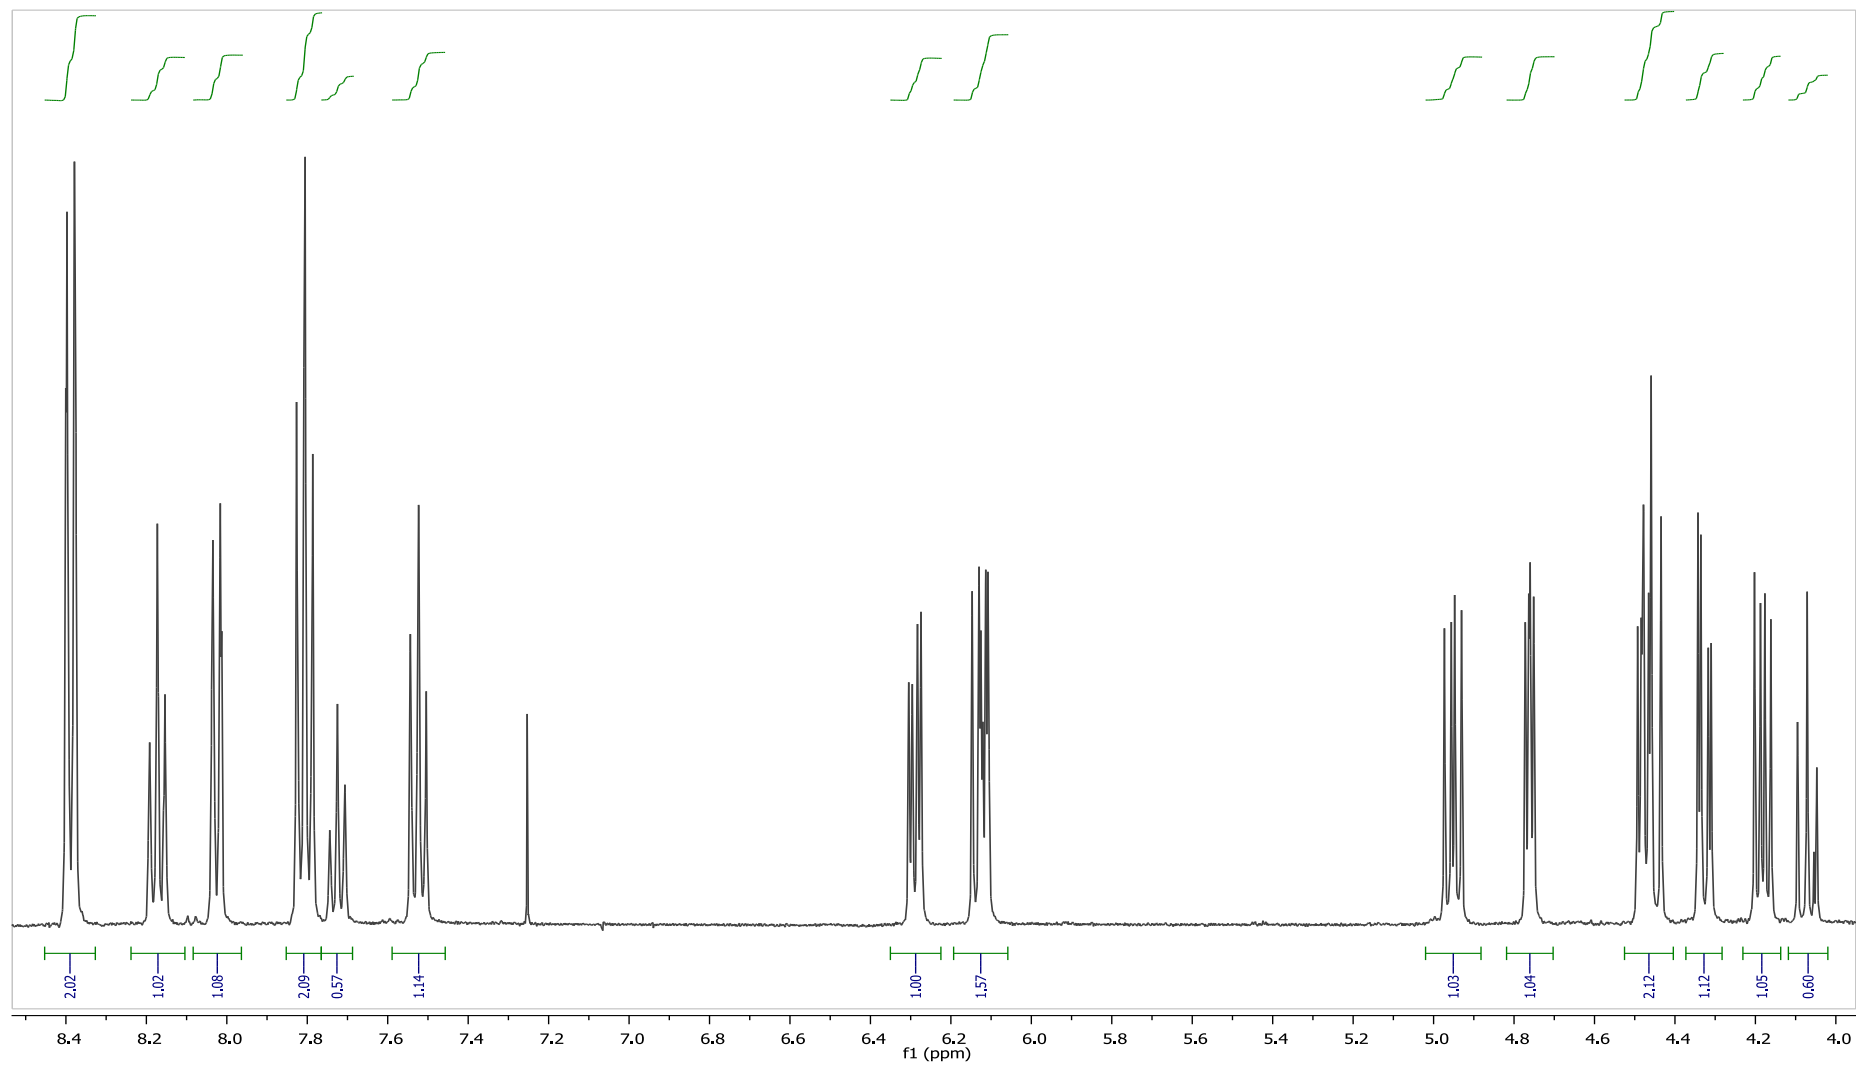

**Figure 3** Proton NMR of the 1,2-bridged intermediate (±)-**15** and product **6**

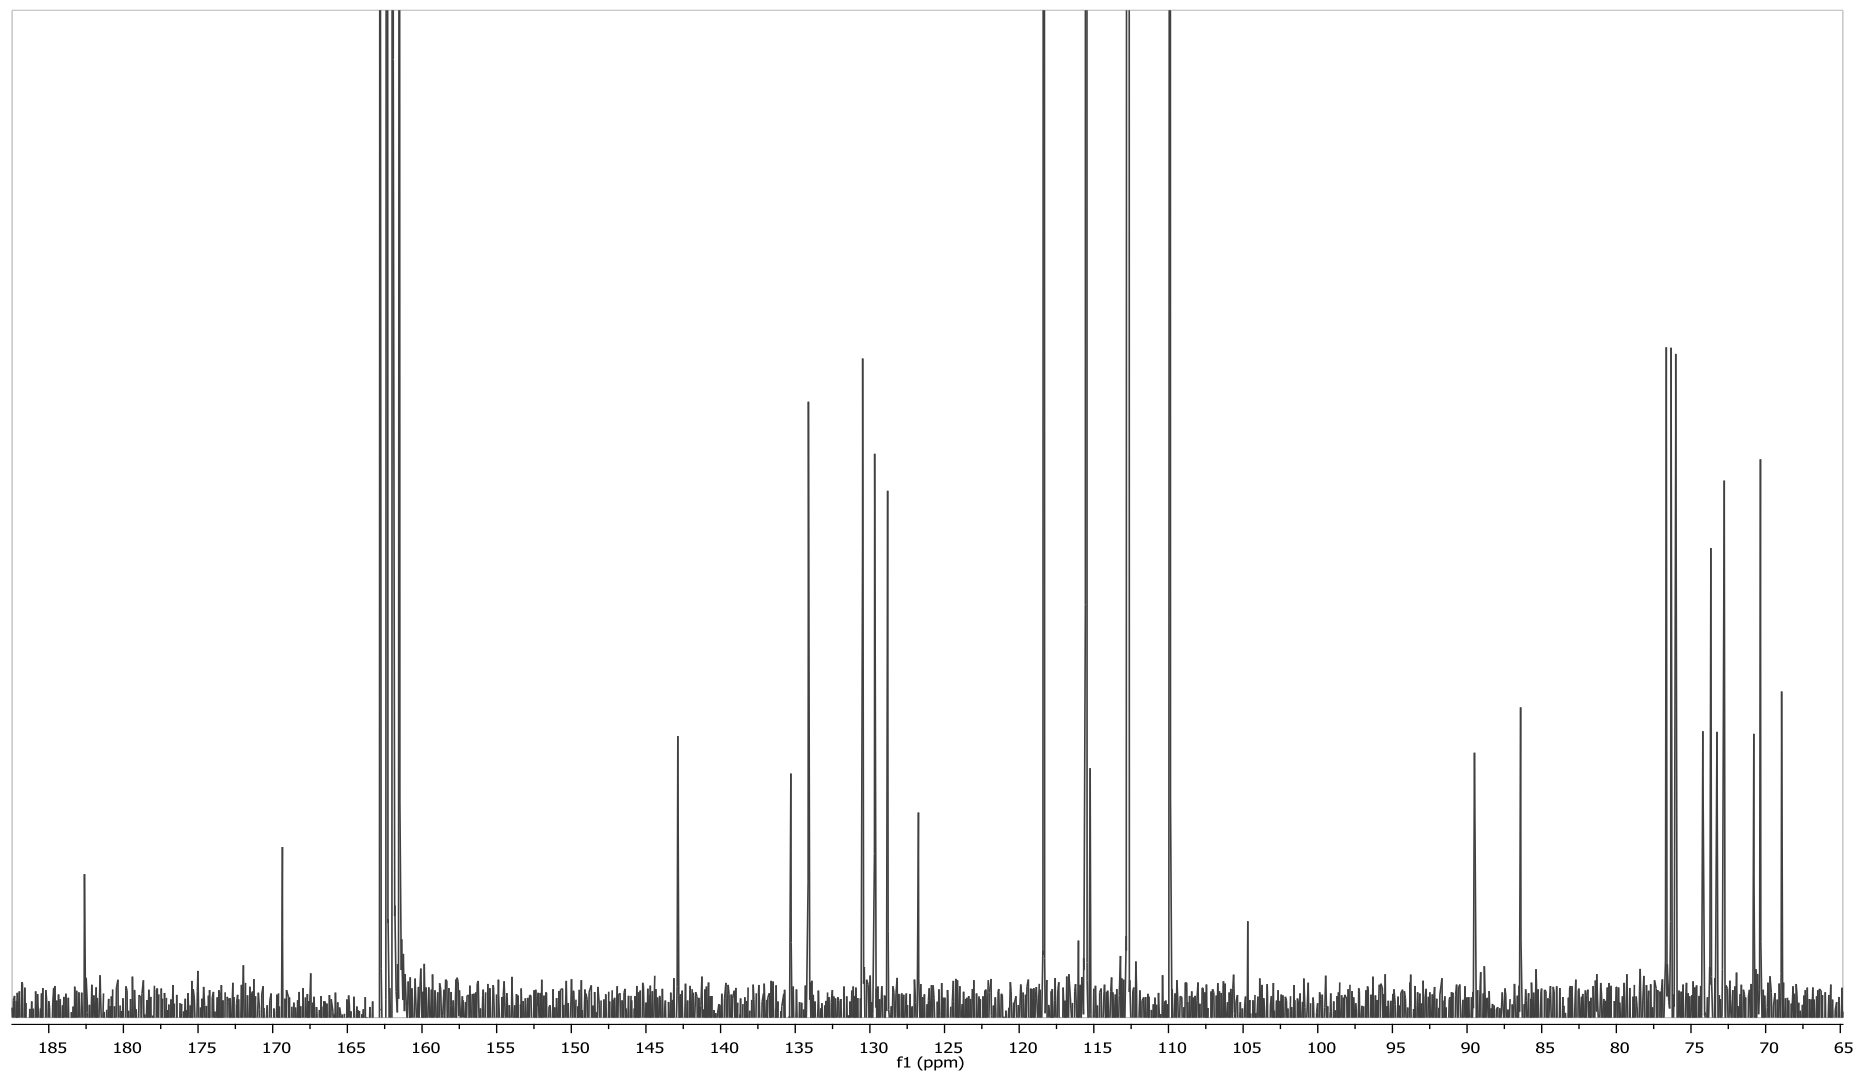

**Figure 4** Carbon NMR spectrum of the 1,2-bridged intermediate ( $\pm$ )-**15** and product **6**

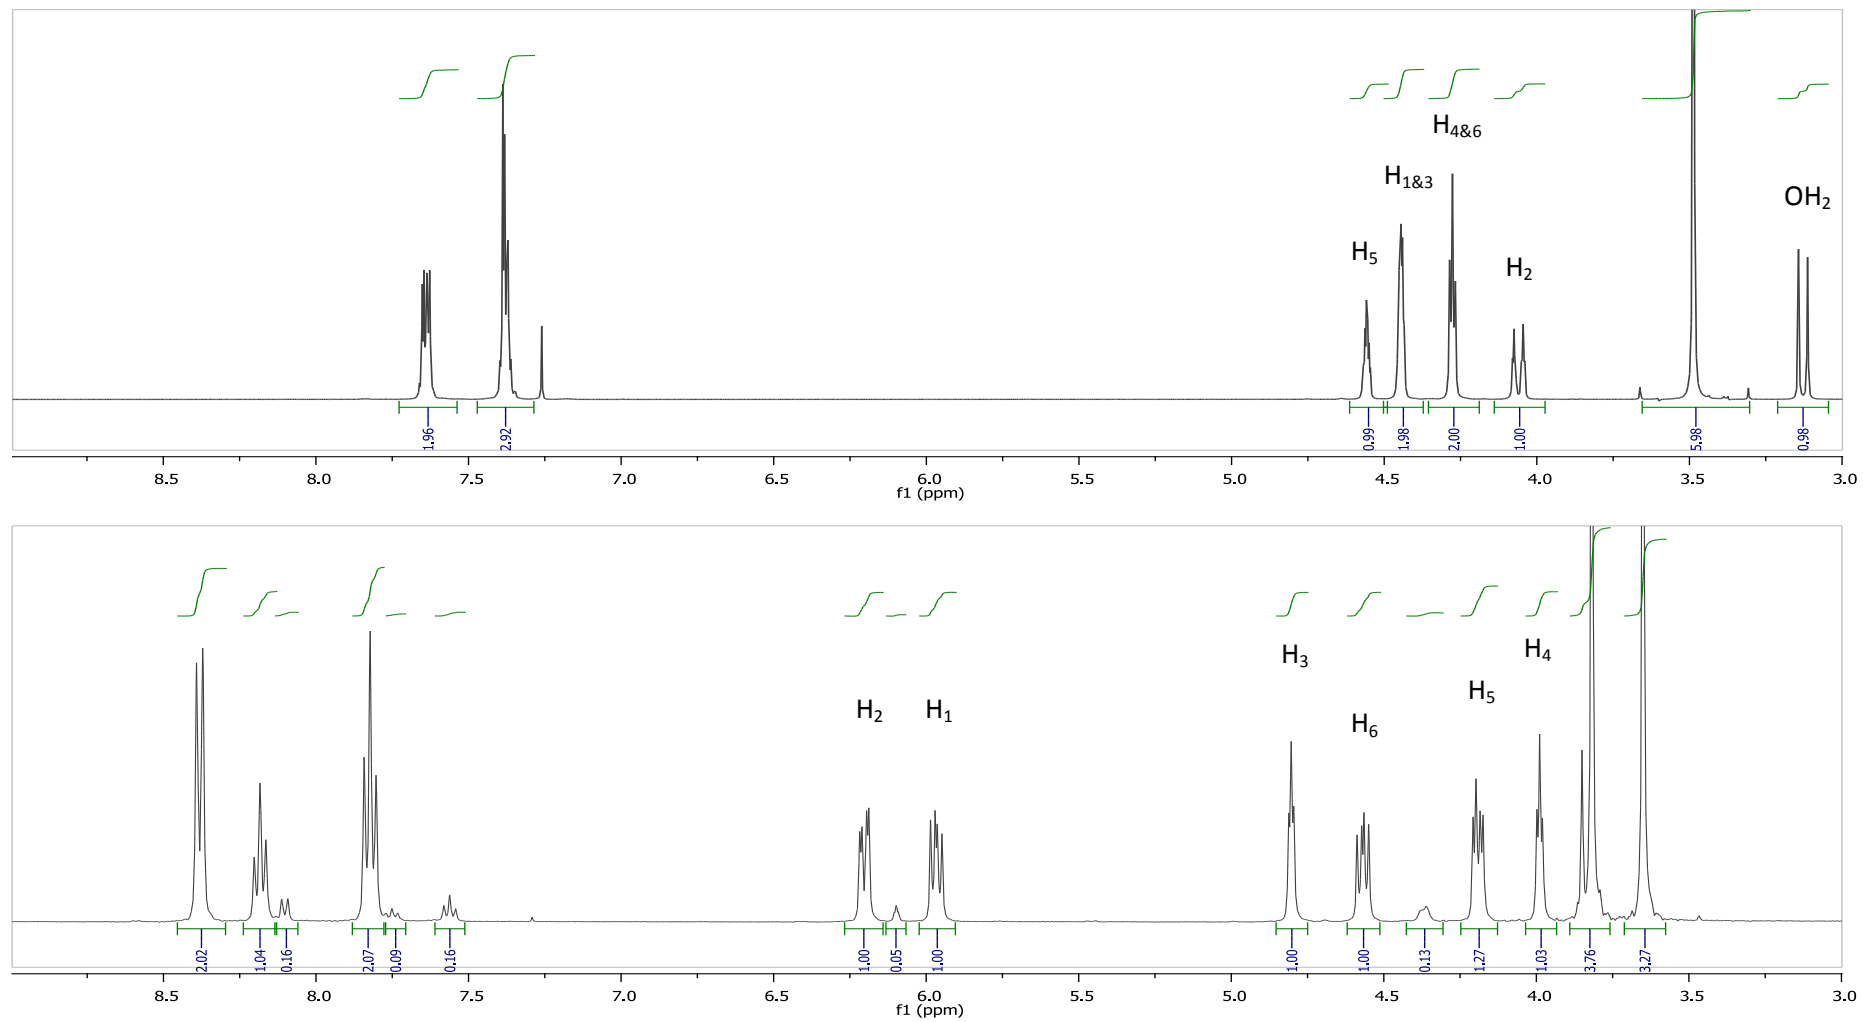

**Figure 5** (A) Proton NMR of starting material *myo*-inositol 4,6-di-*O*-Me 1,3,5-orthobenzoate **16**;  
 (B) Proton NMR of the 1,2-bridged intermediate (±)-**17** with very small amount of product **18**

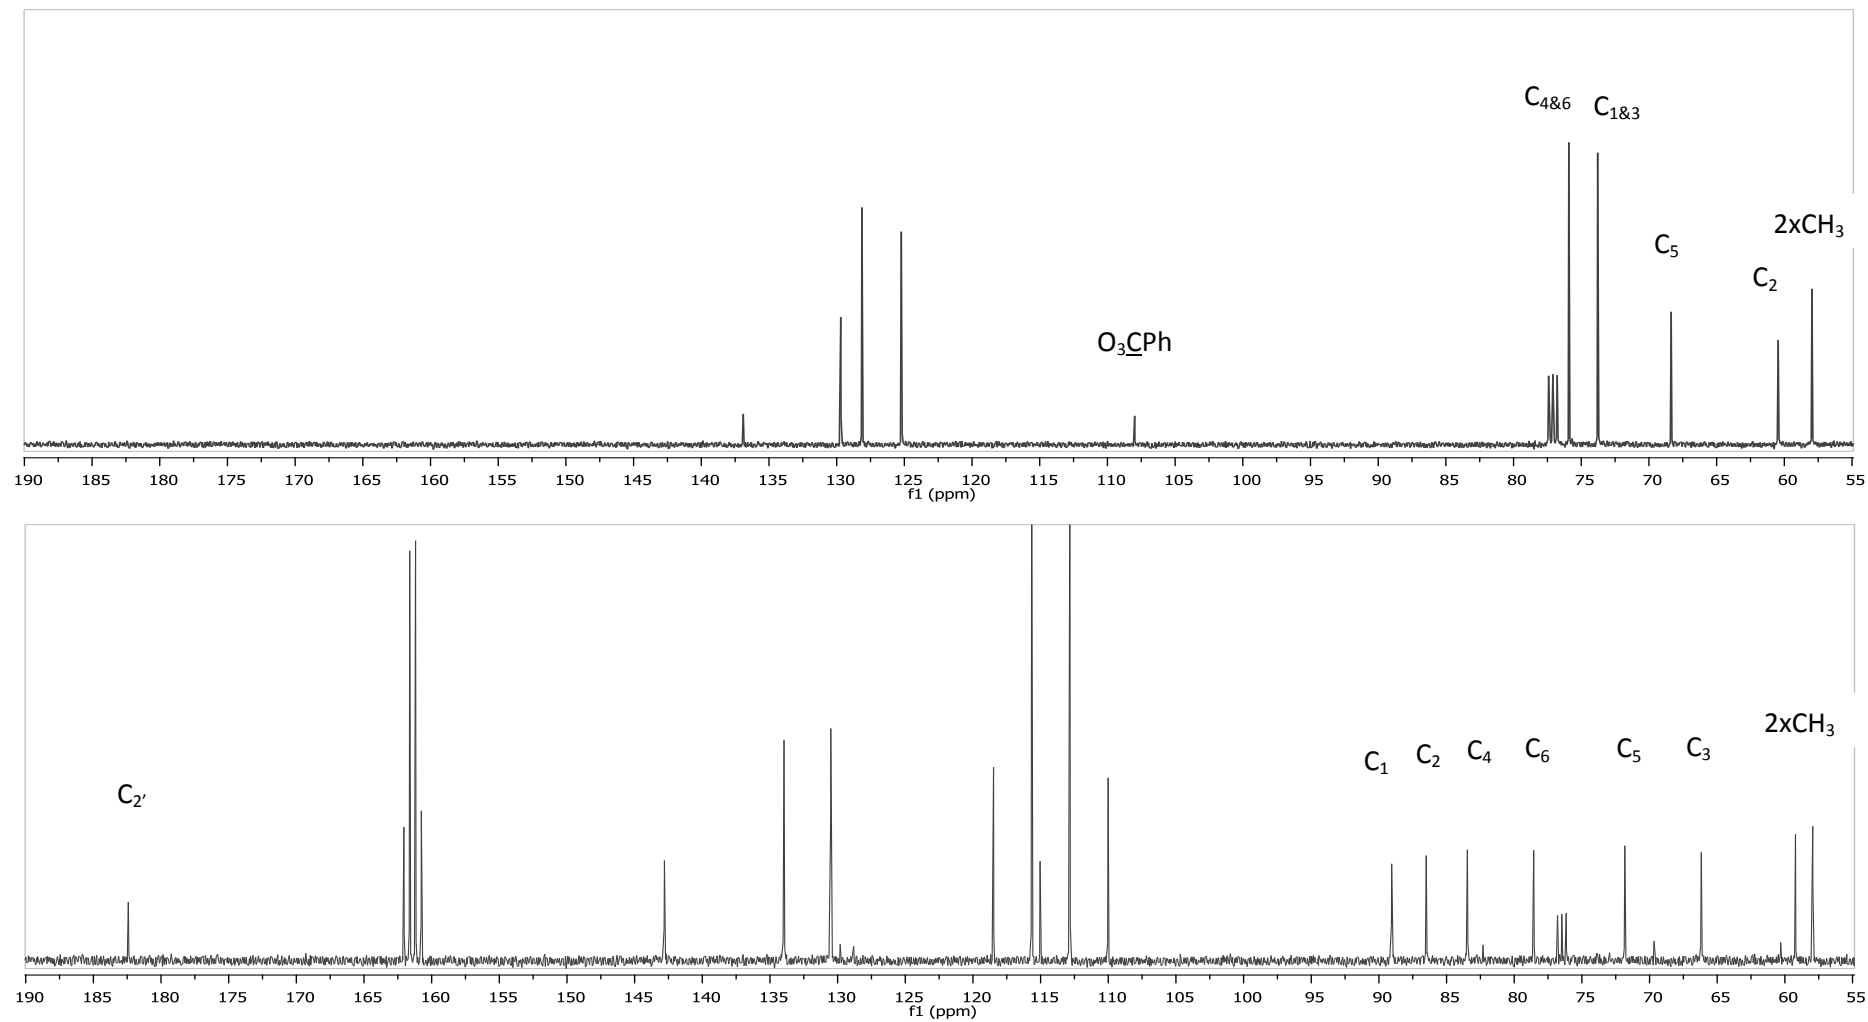

**Figure 6** (A) Carbon NMR of starting material *myo*-inositol 4,6-di-*O*-Me 1,3,5-ortho-benzoate **16**;

(B) Carbon NMR of the 1,2-bridged intermediate (±)-**17** with very small amount of product **18**



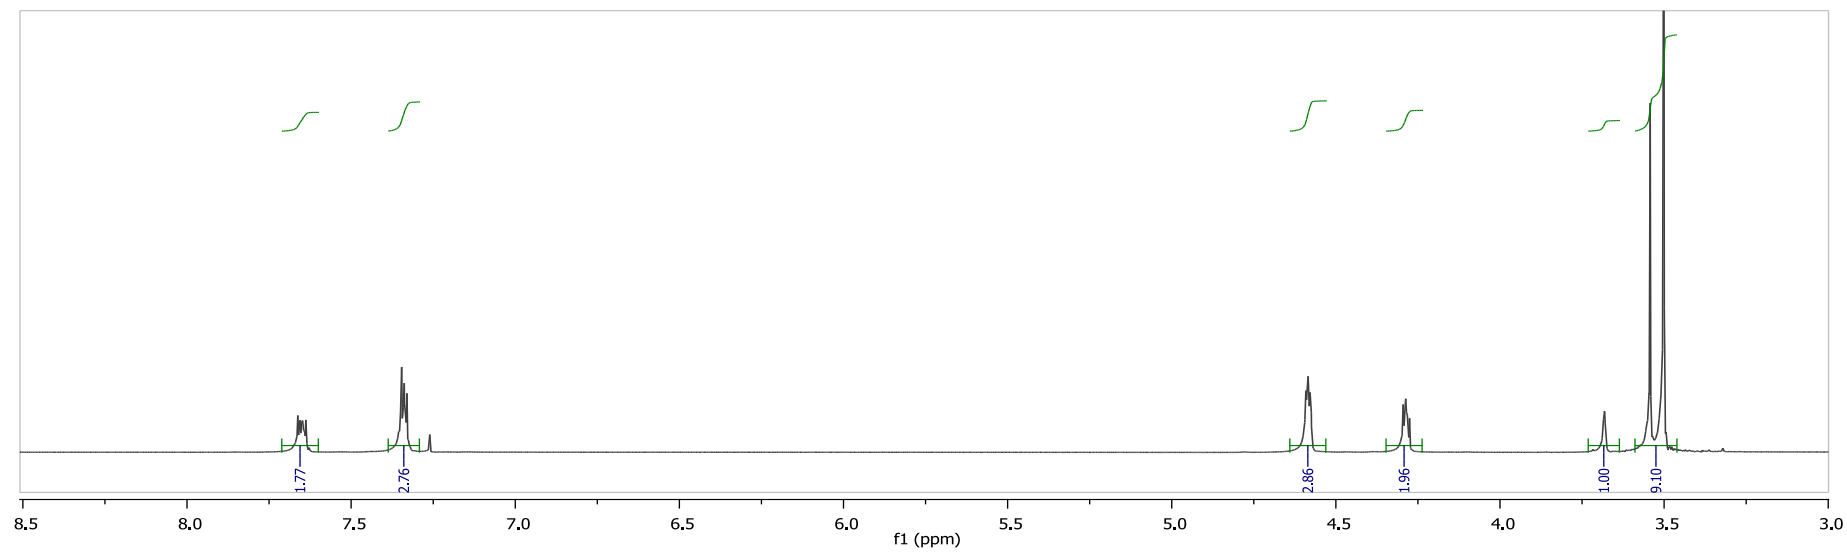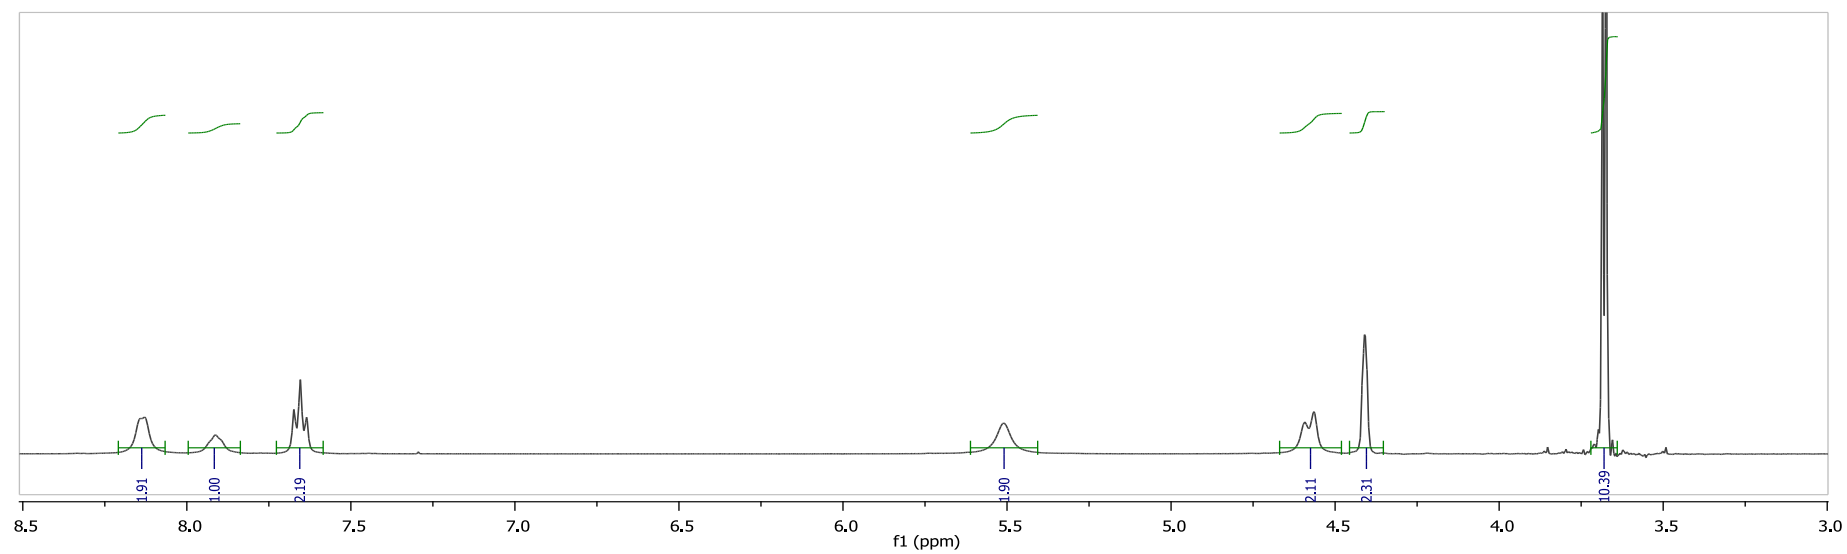

**Figure 7** Comparison of  $^1\text{H}$  NMR spectrum of **24** (A) in  $\text{CDCl}_3$  and (B) in  $\text{CF}_3\text{CO}_2\text{D}$  and  $\text{CDCl}_3$

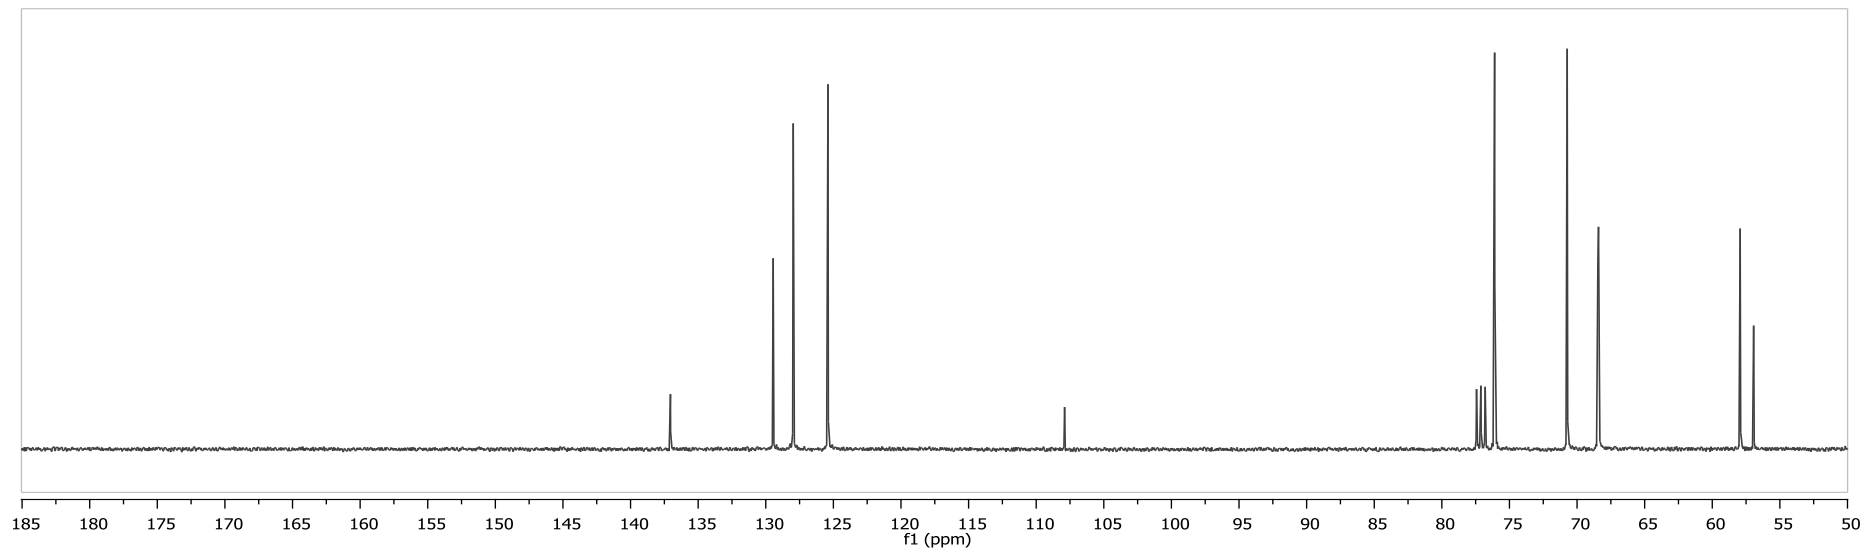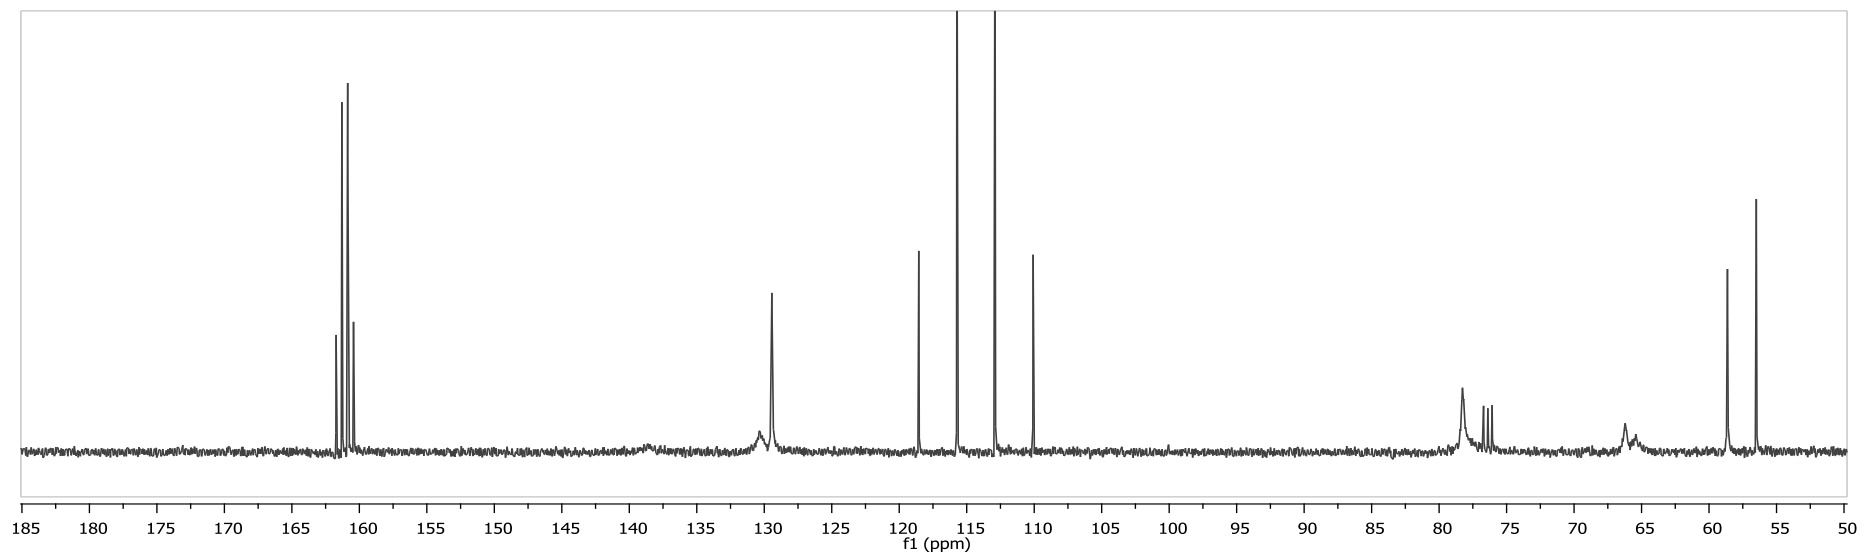

**Figure 8** Comparison of  $^{13}\text{C}$  NMR spectrum of **24** (A) in  $\text{CDCl}_3$  and (B) in  $\text{CF}_3\text{CO}_2\text{D}$  and  $\text{CDCl}_3$

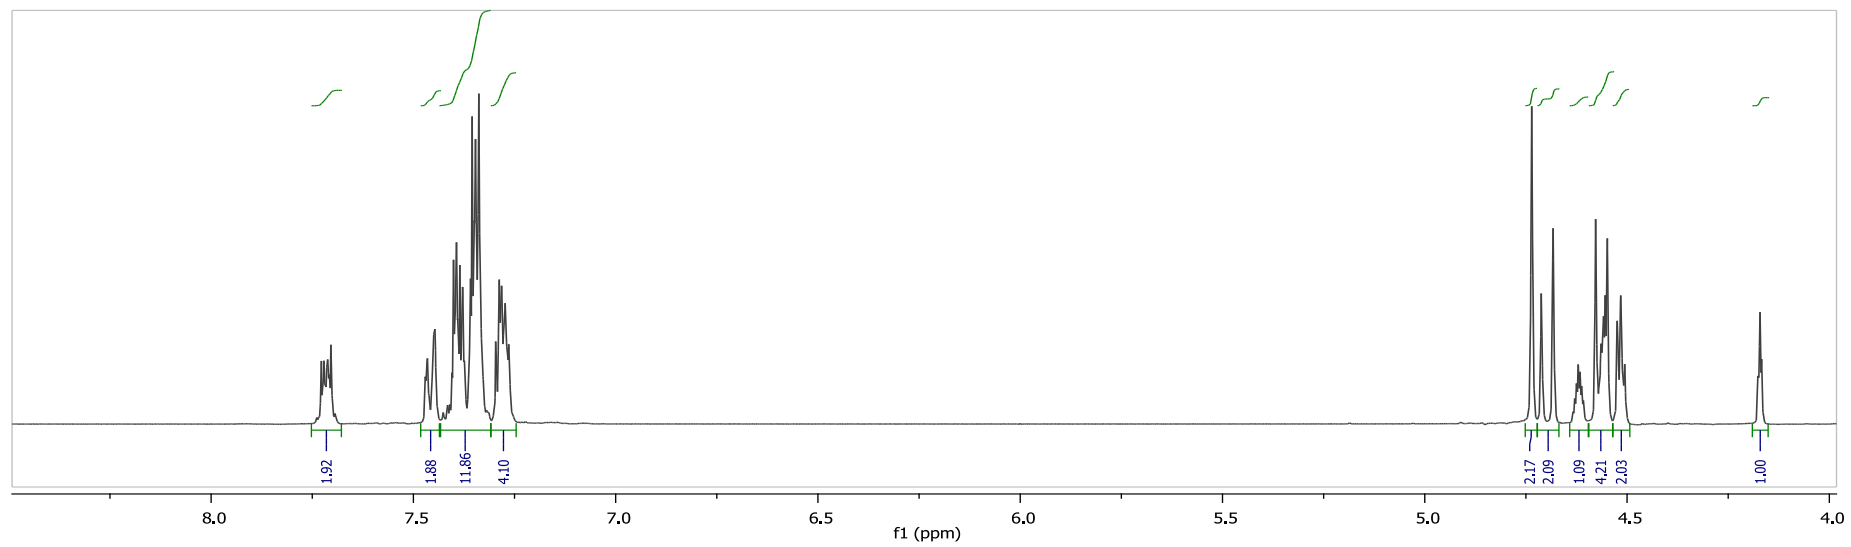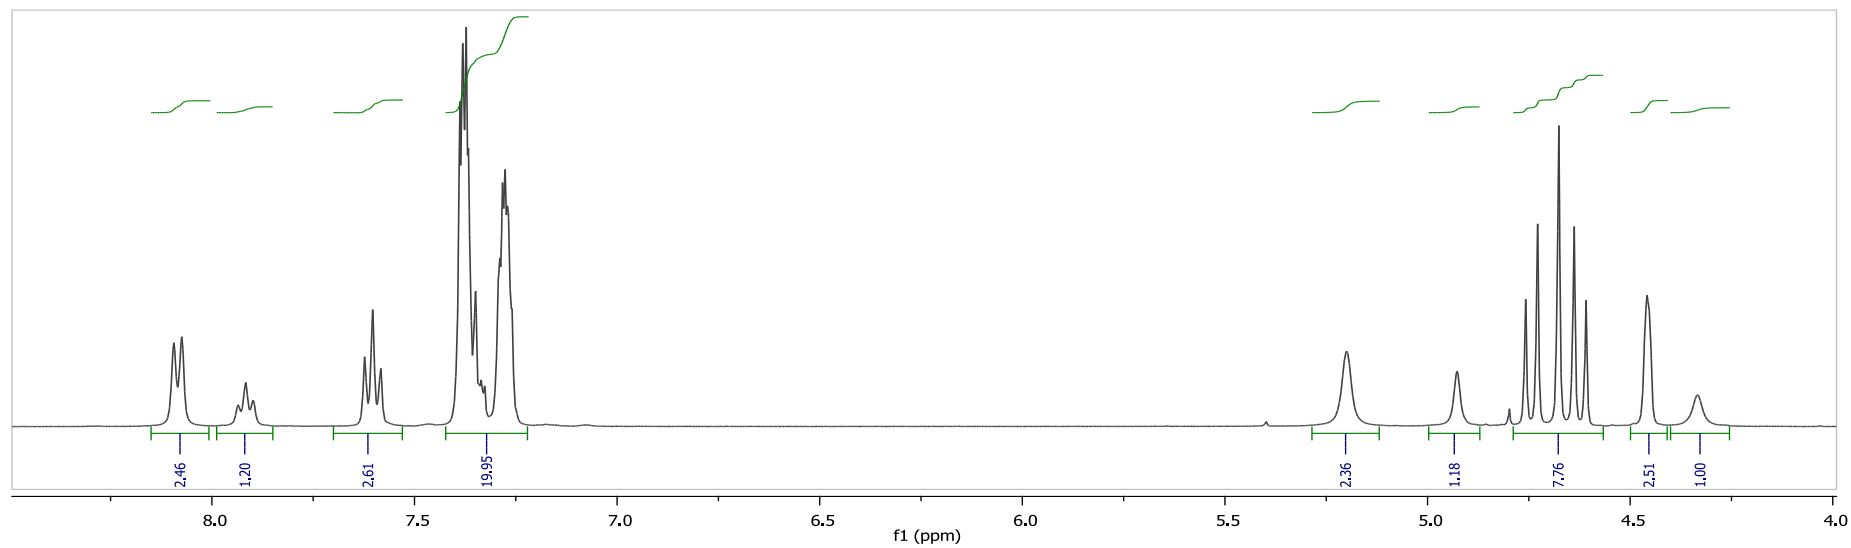

**Figure 9** Comparison of <sup>1</sup>H NMR spectrum of **25** (A) in CDCl<sub>3</sub> and (B) in CF<sub>3</sub>CO<sub>2</sub>D

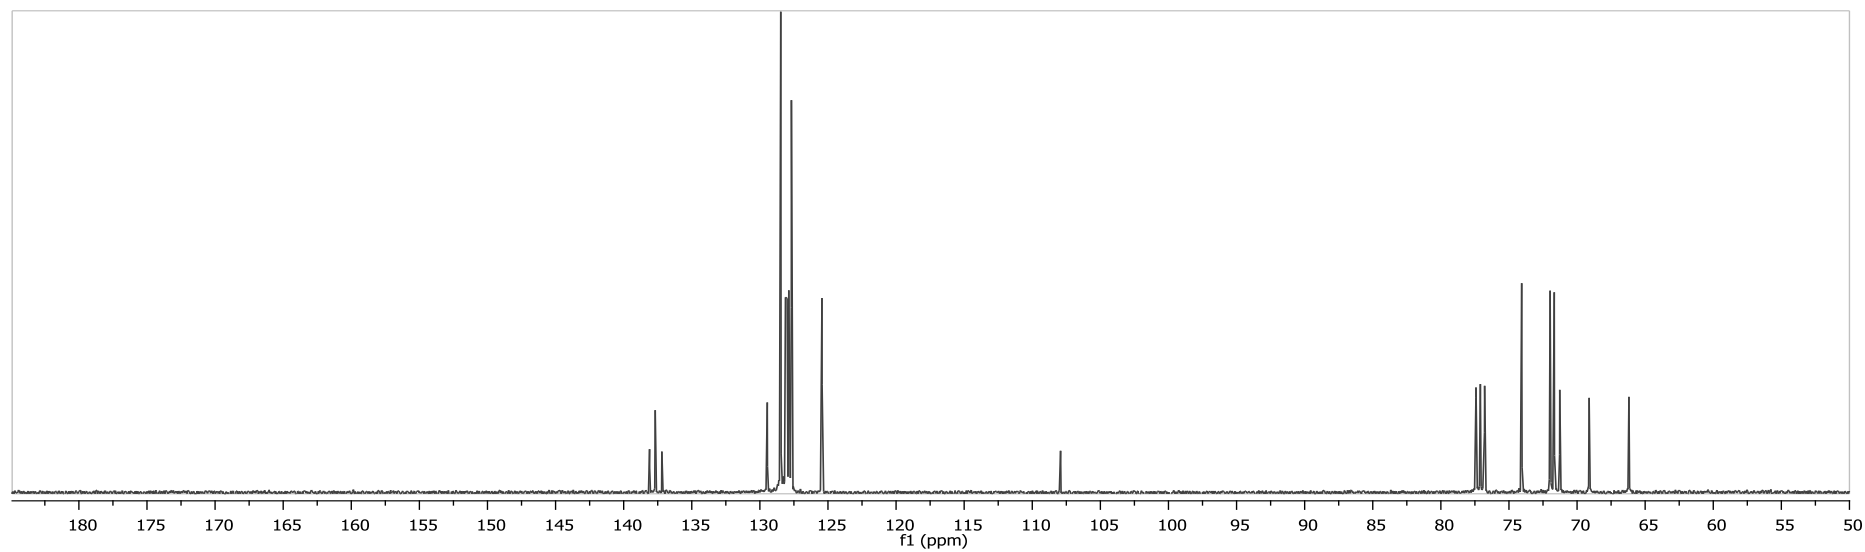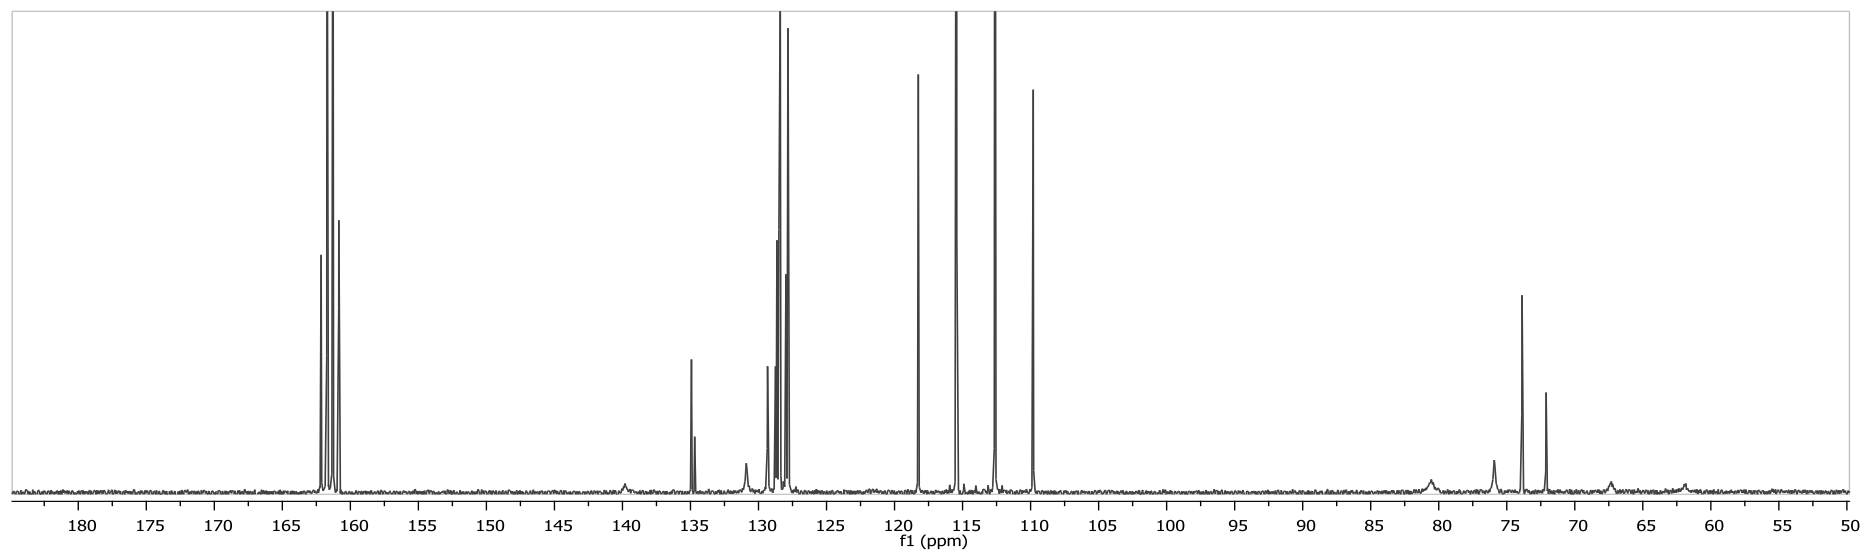

**Figure 10** Comparison of  $^{13}\text{C}$  NMR spectrum of **25** (A) in  $\text{CDCl}_3$  and (B) in  $\text{CF}_3\text{CO}_2\text{D}$

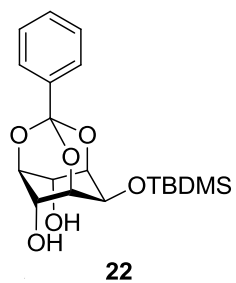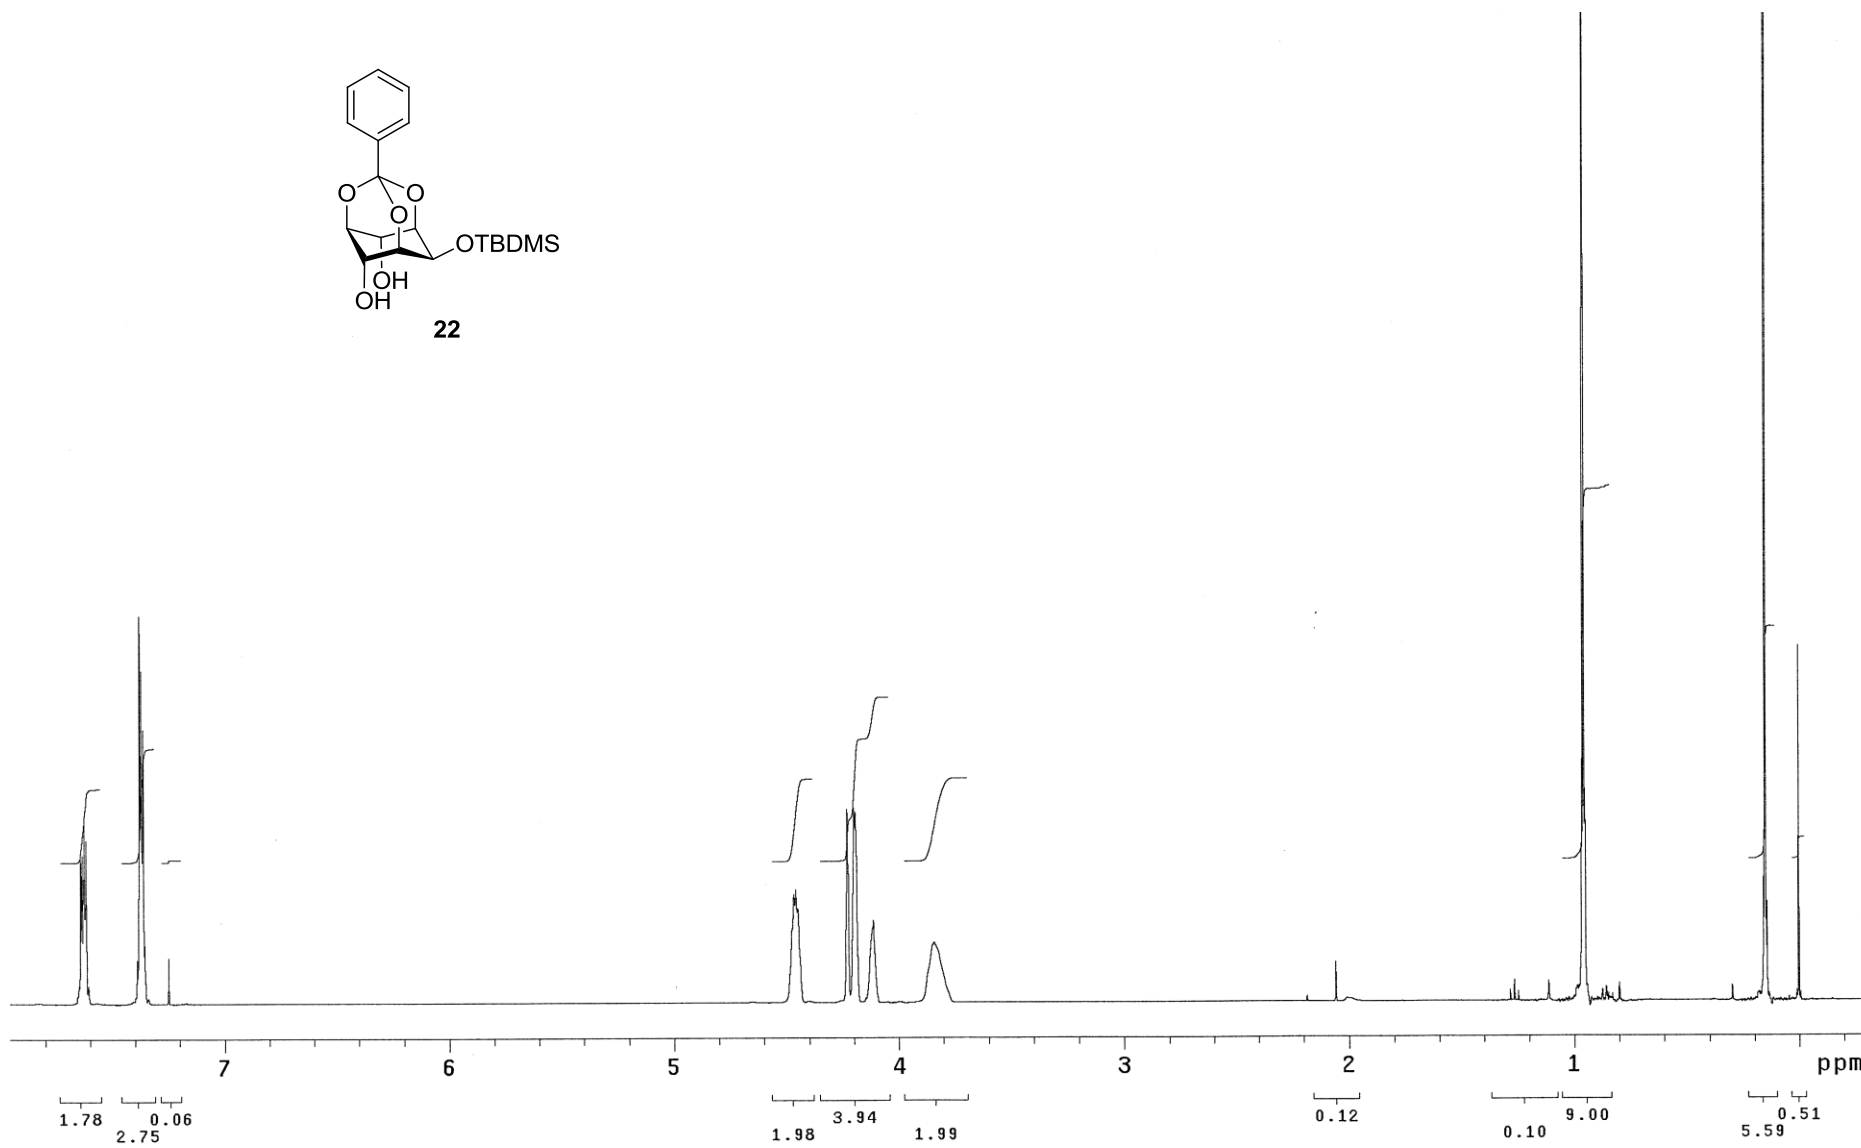

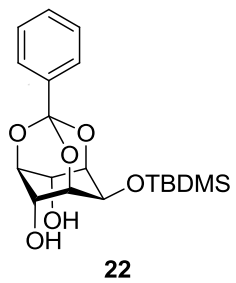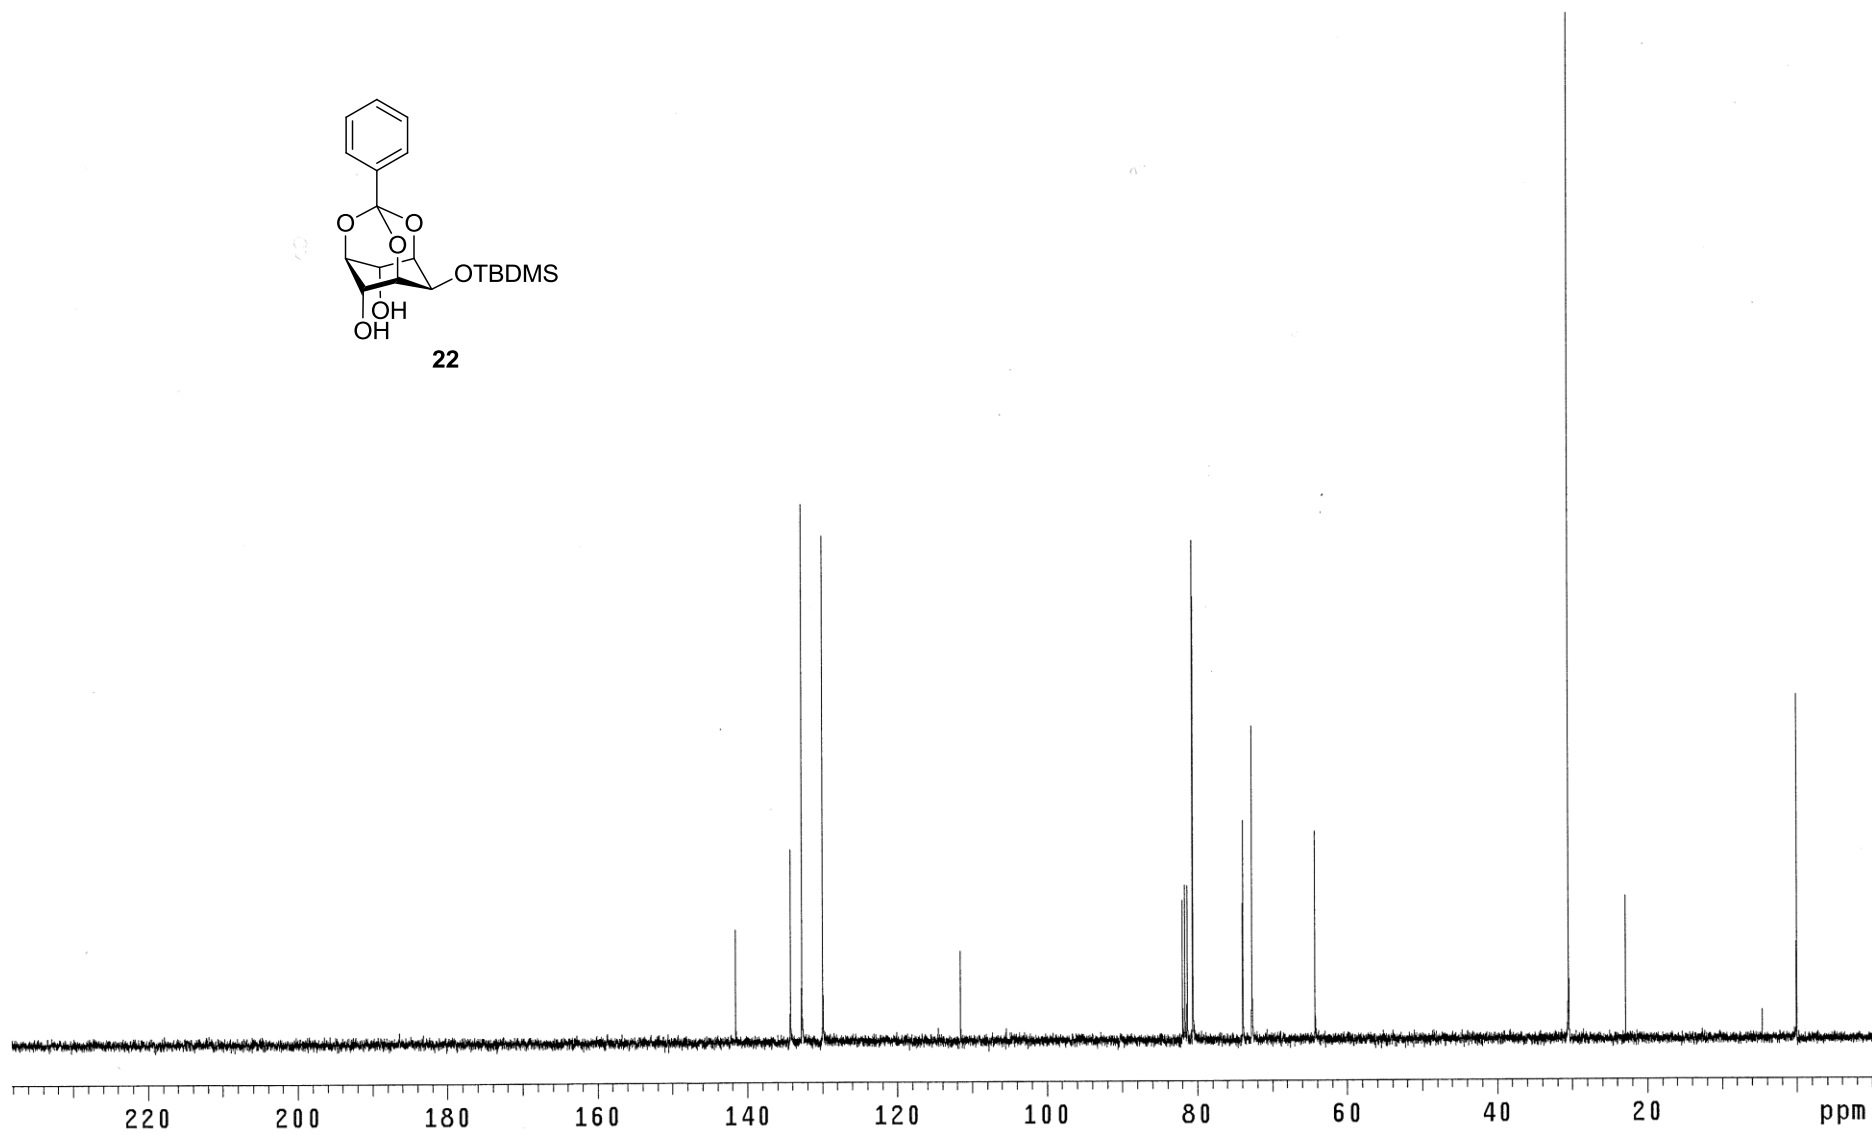

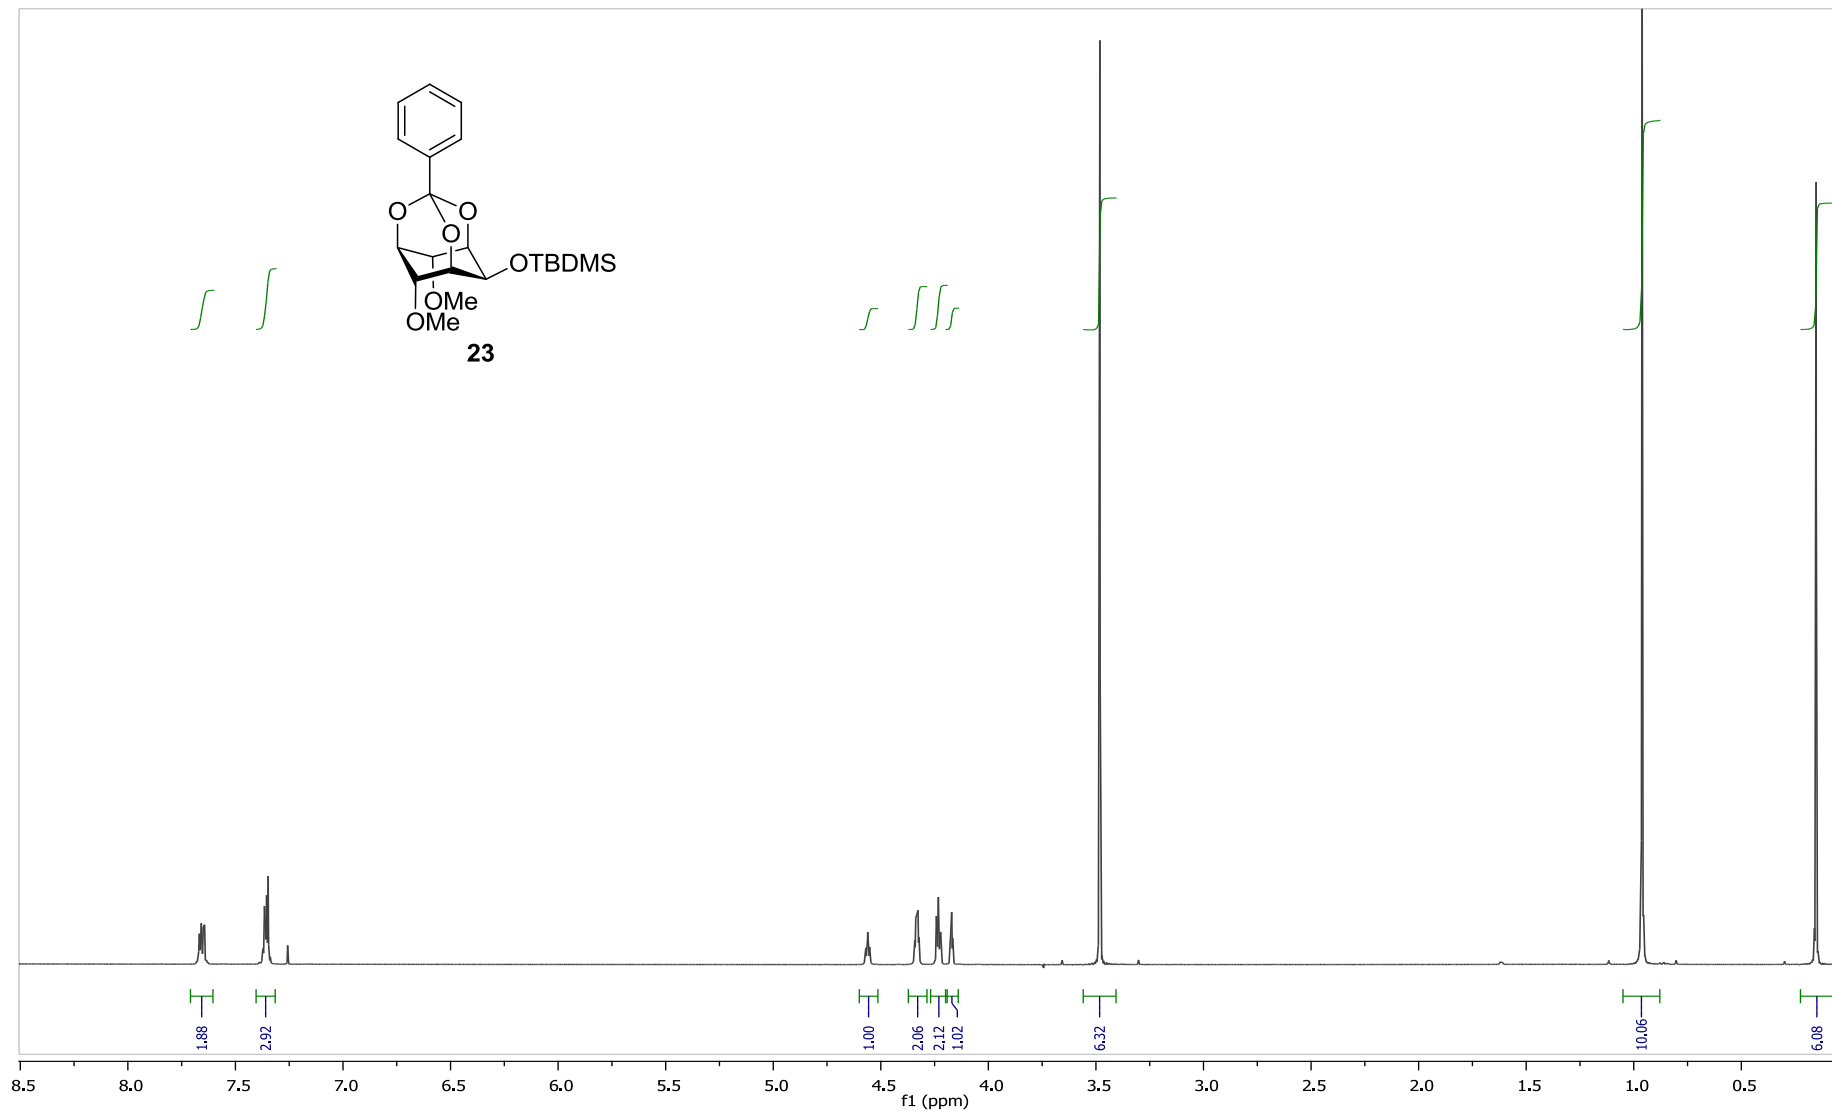

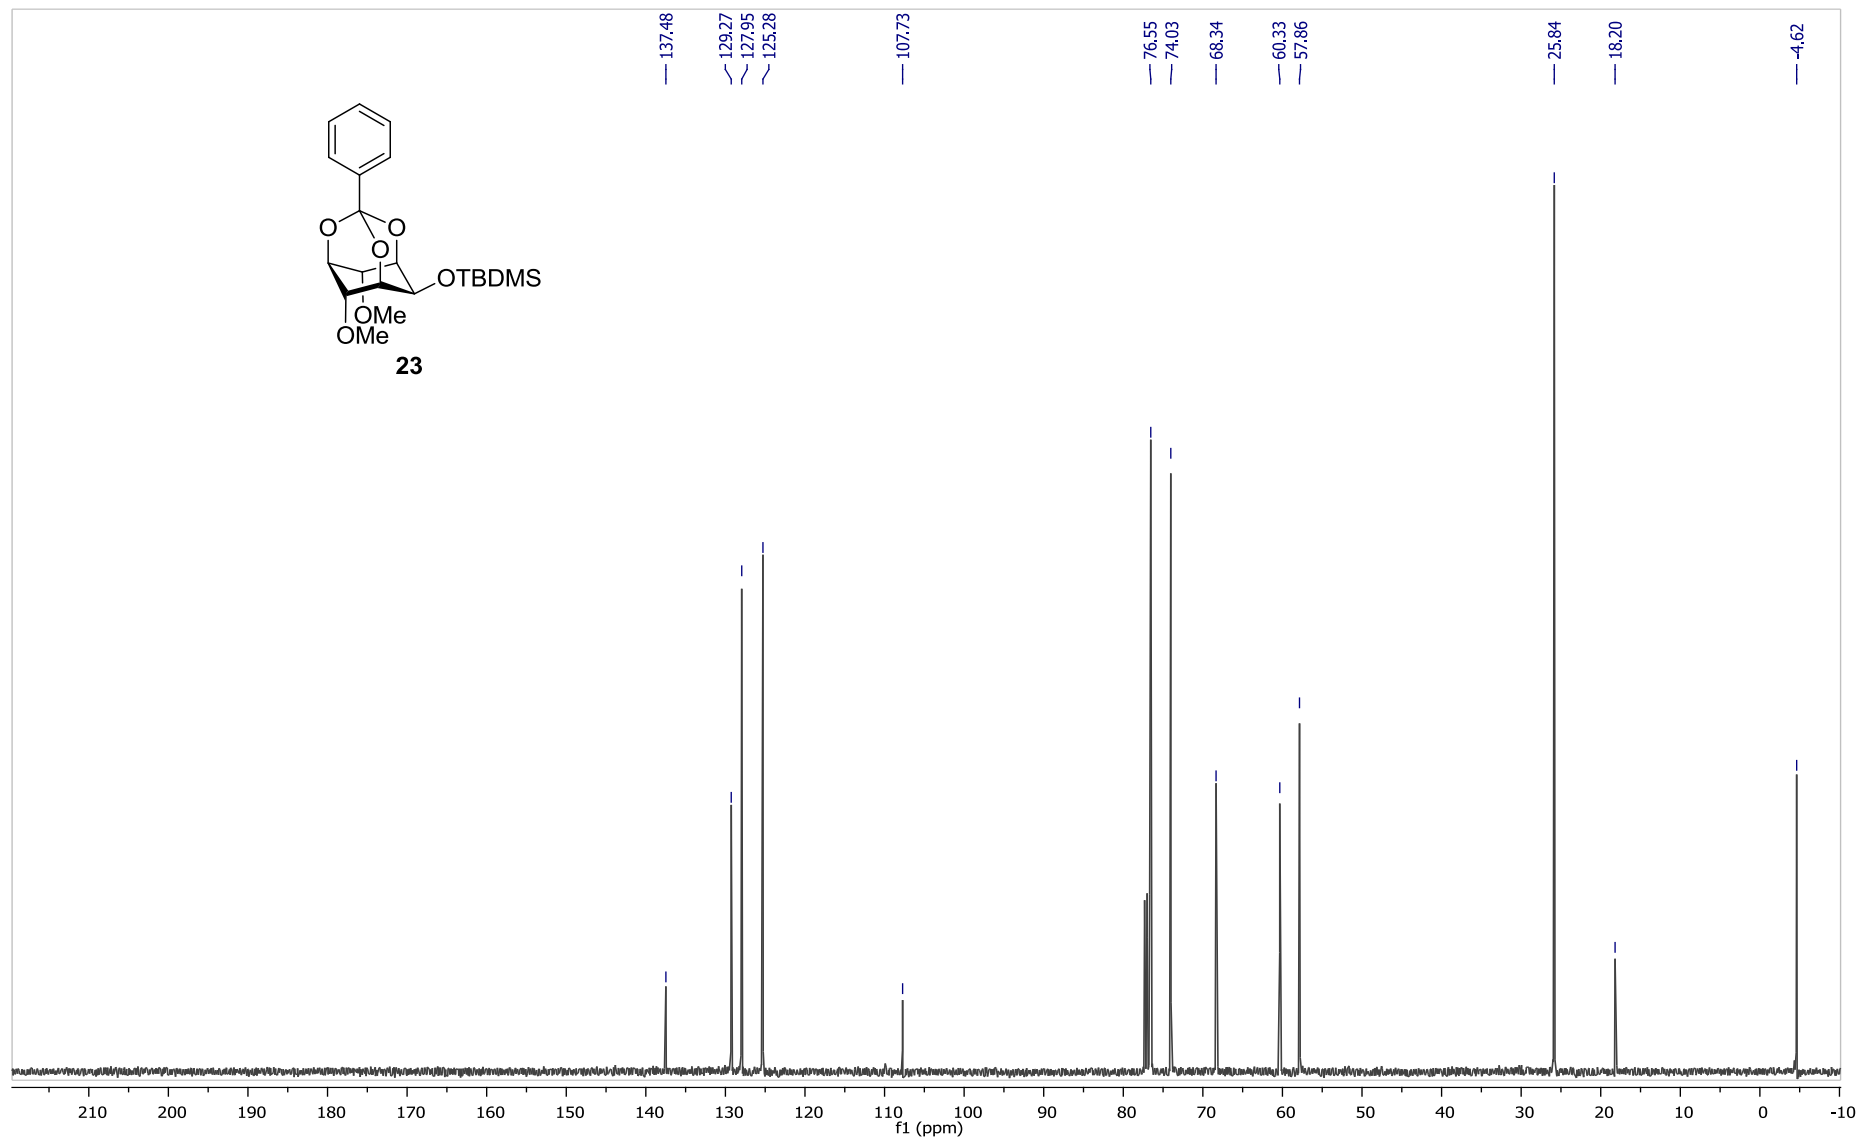



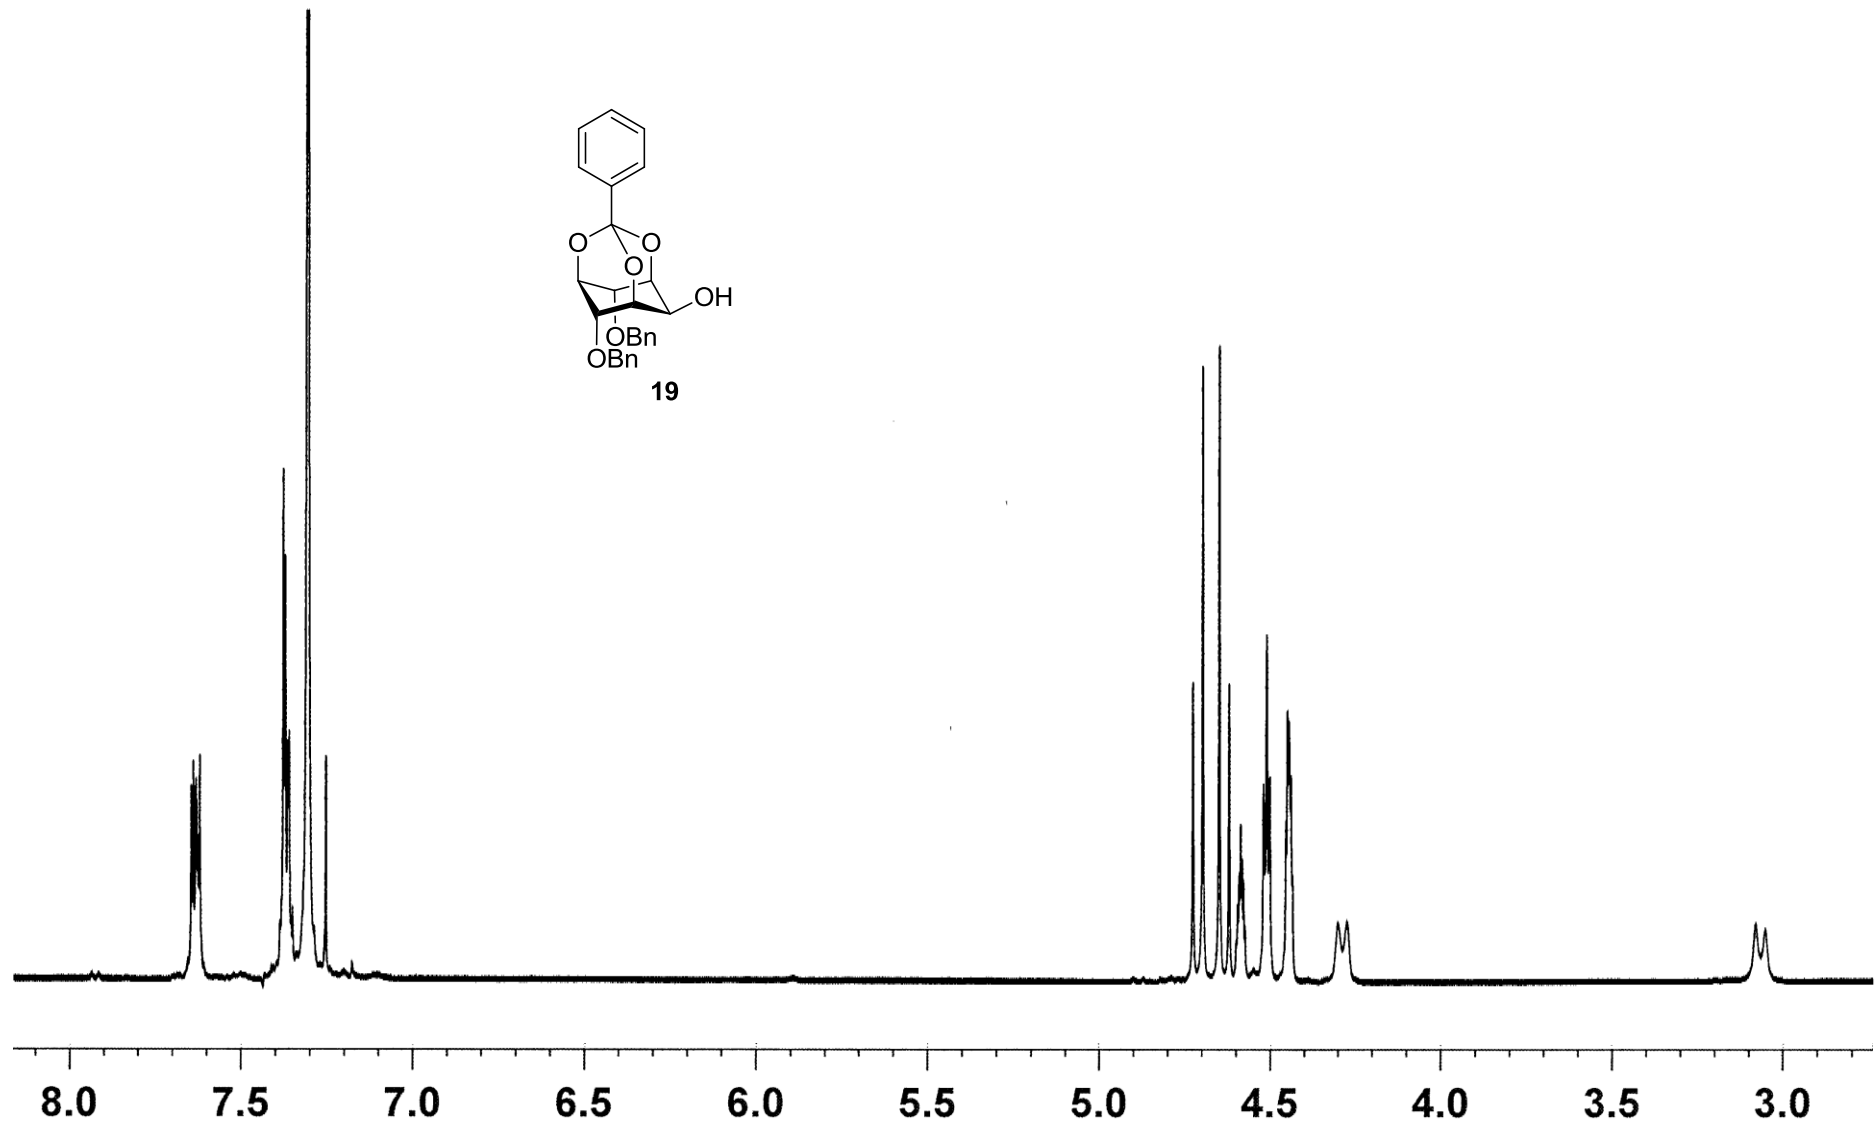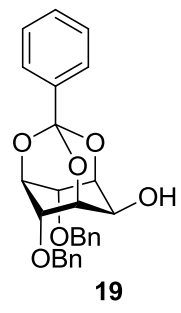

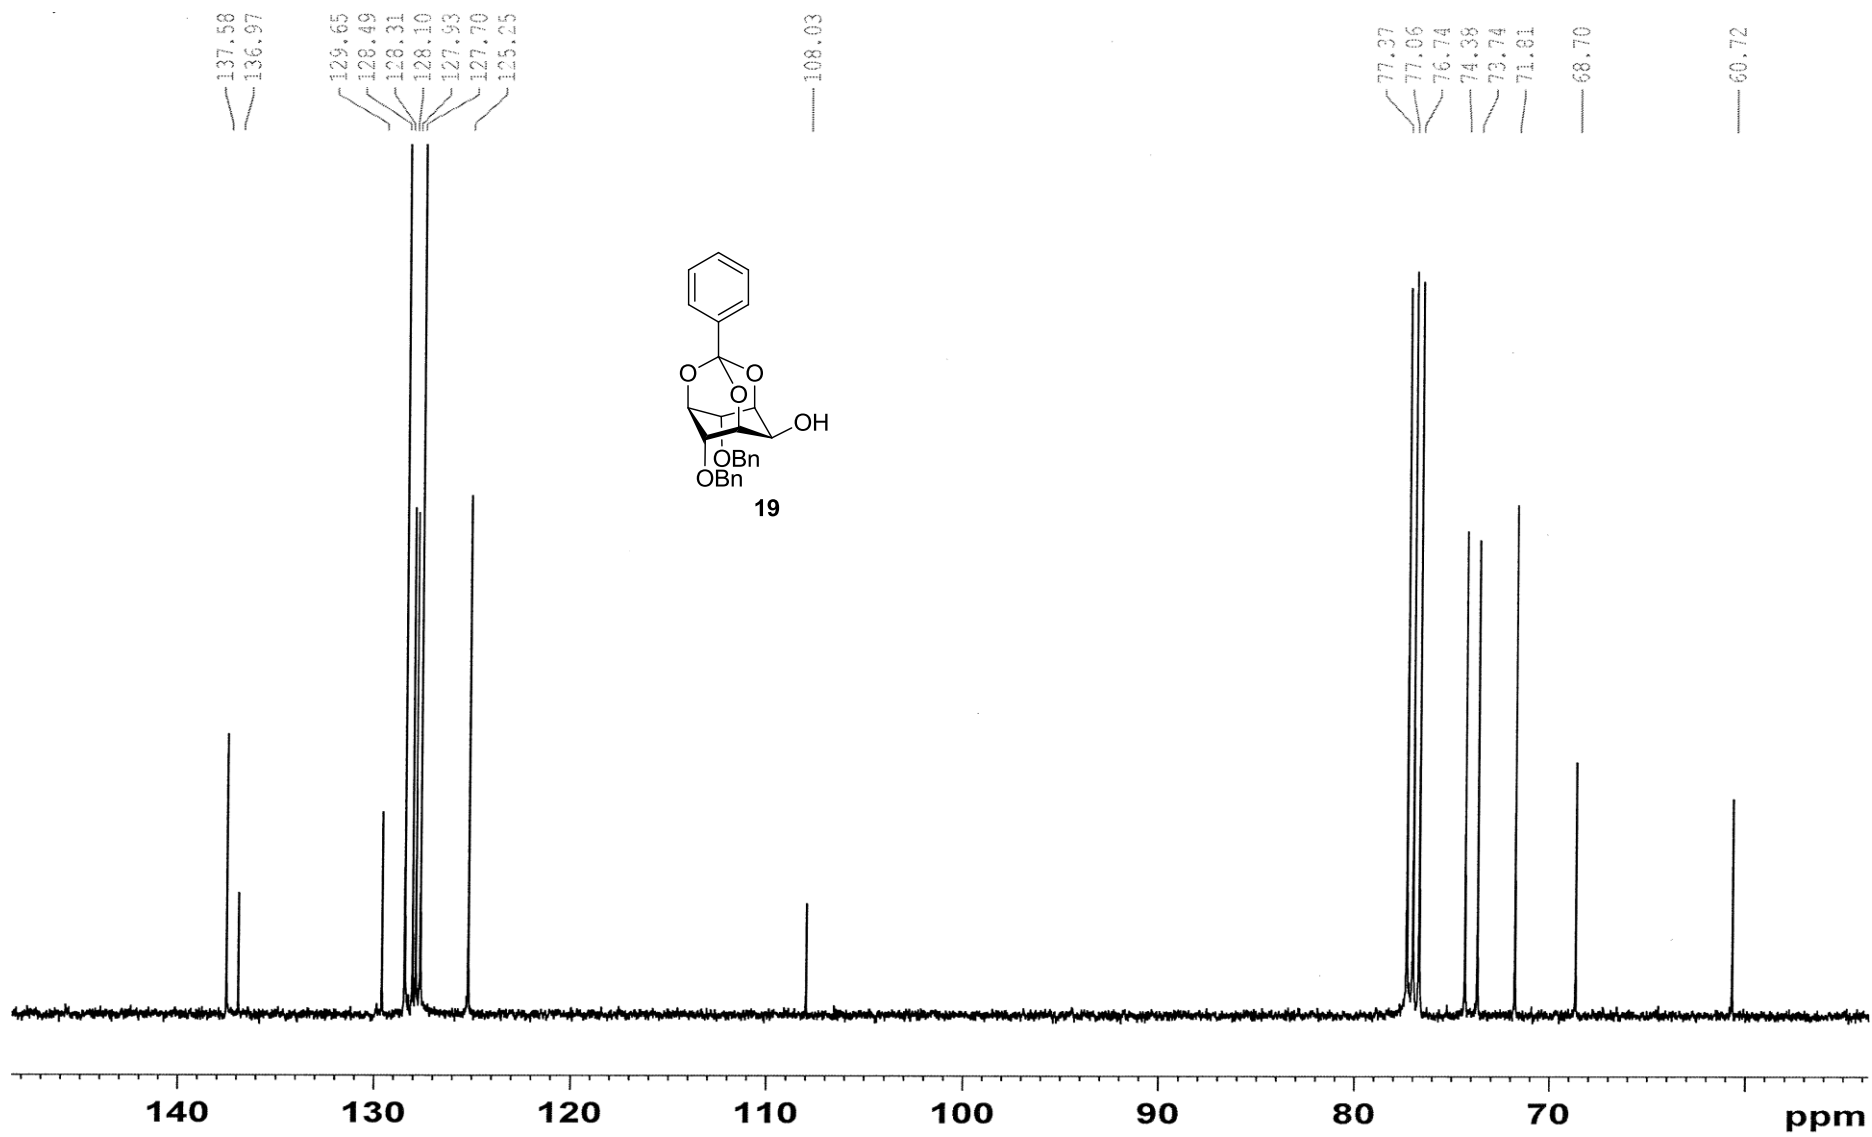

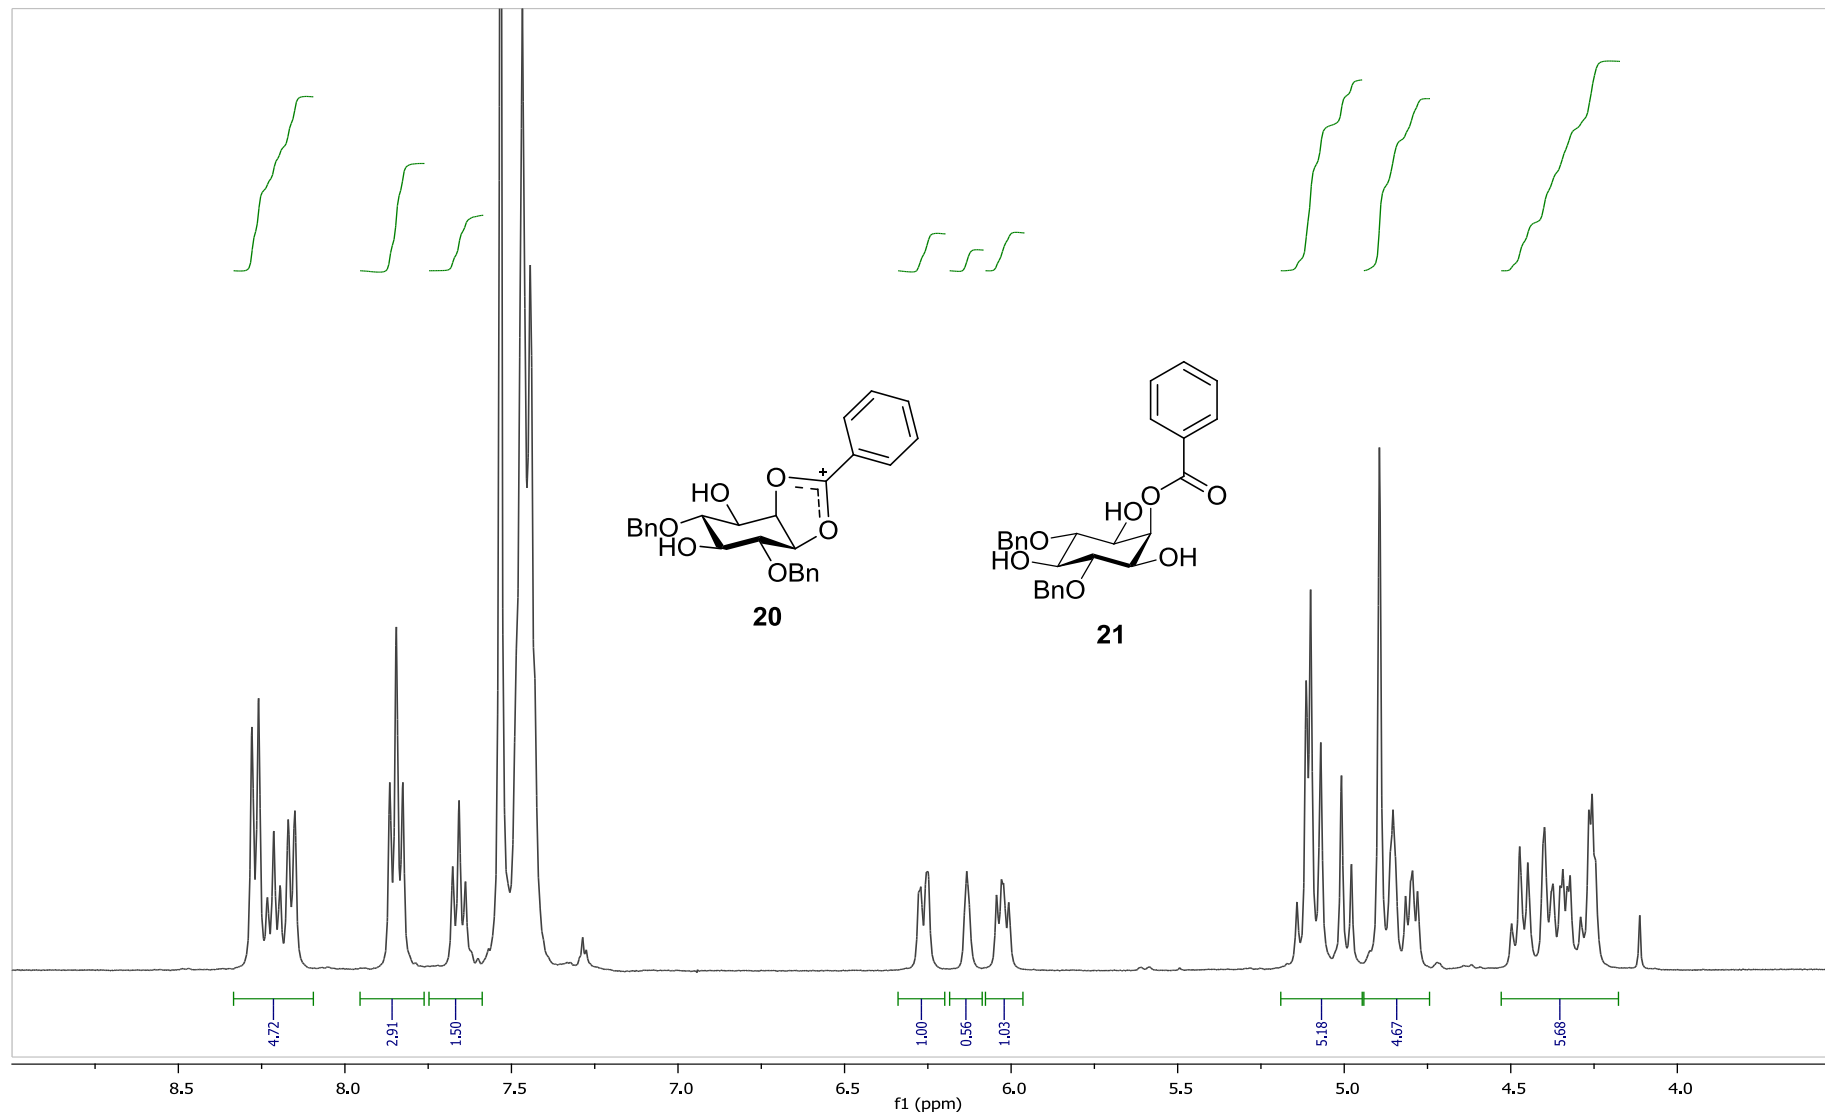

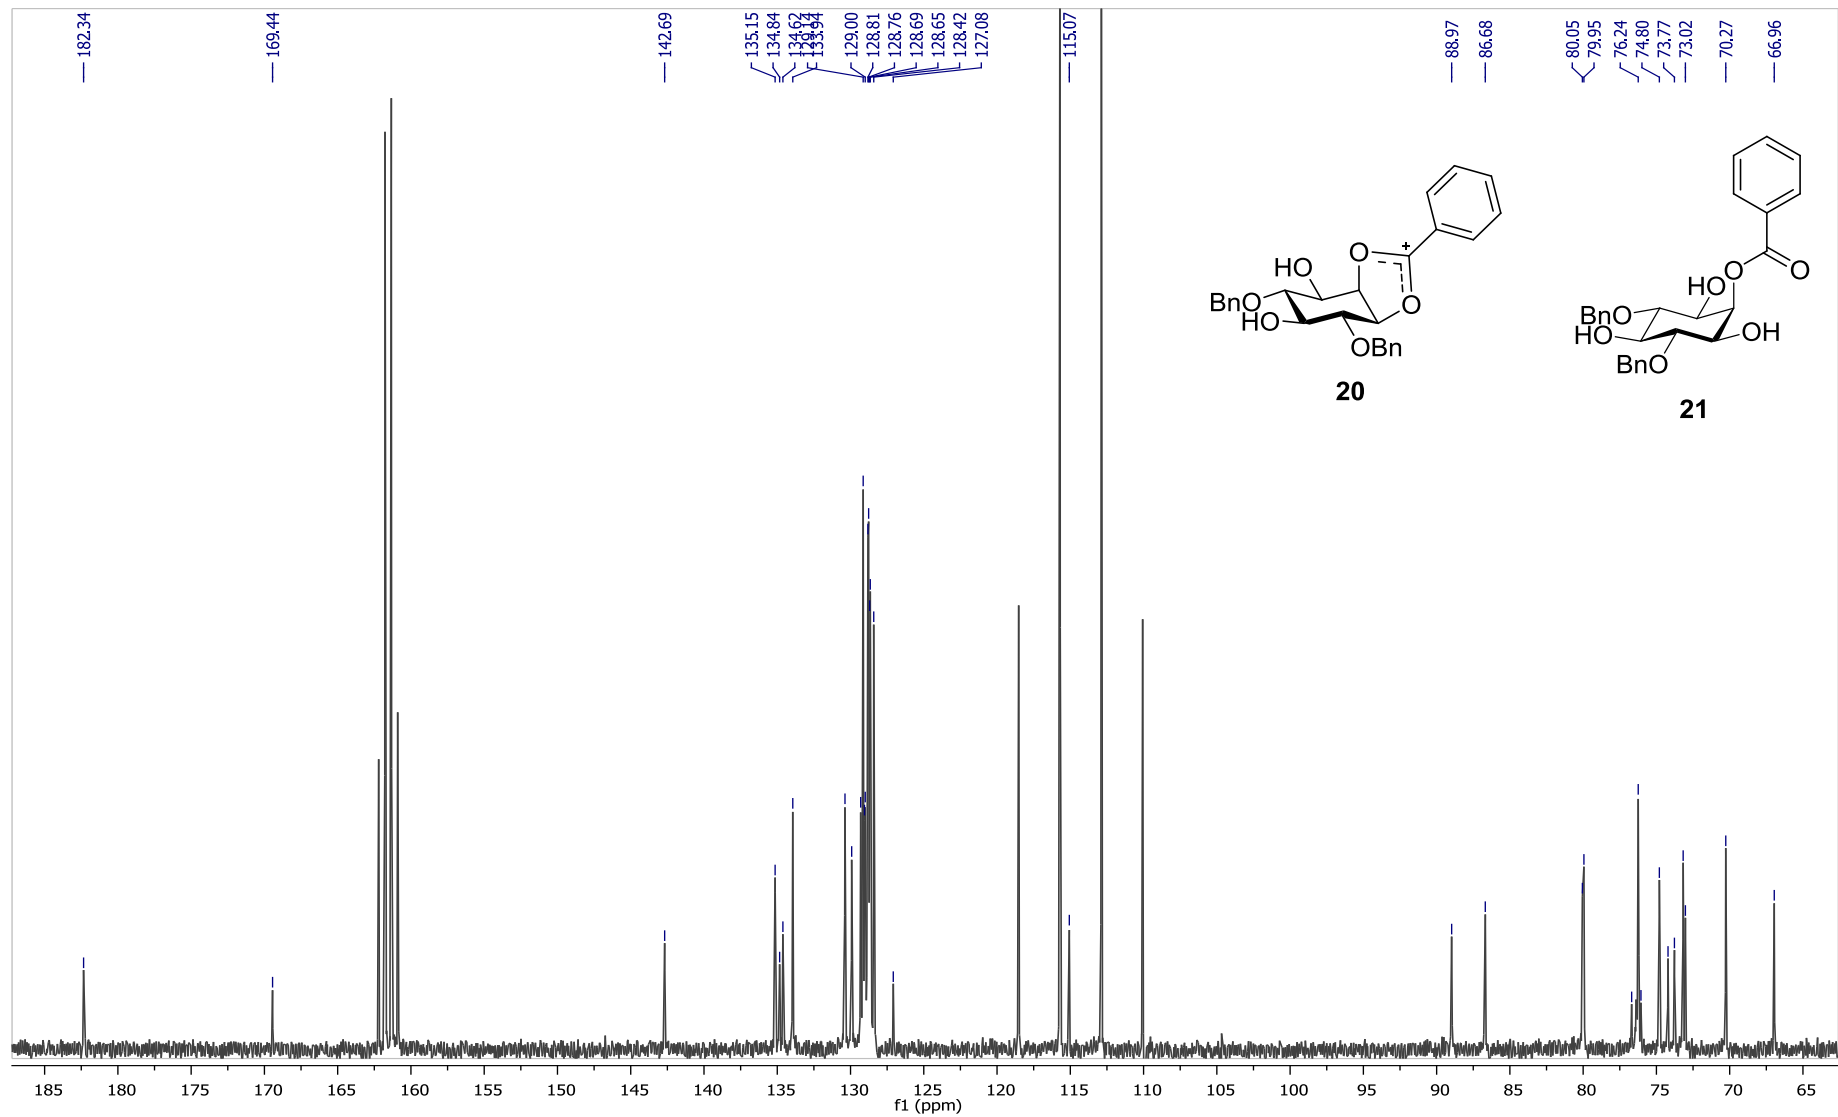

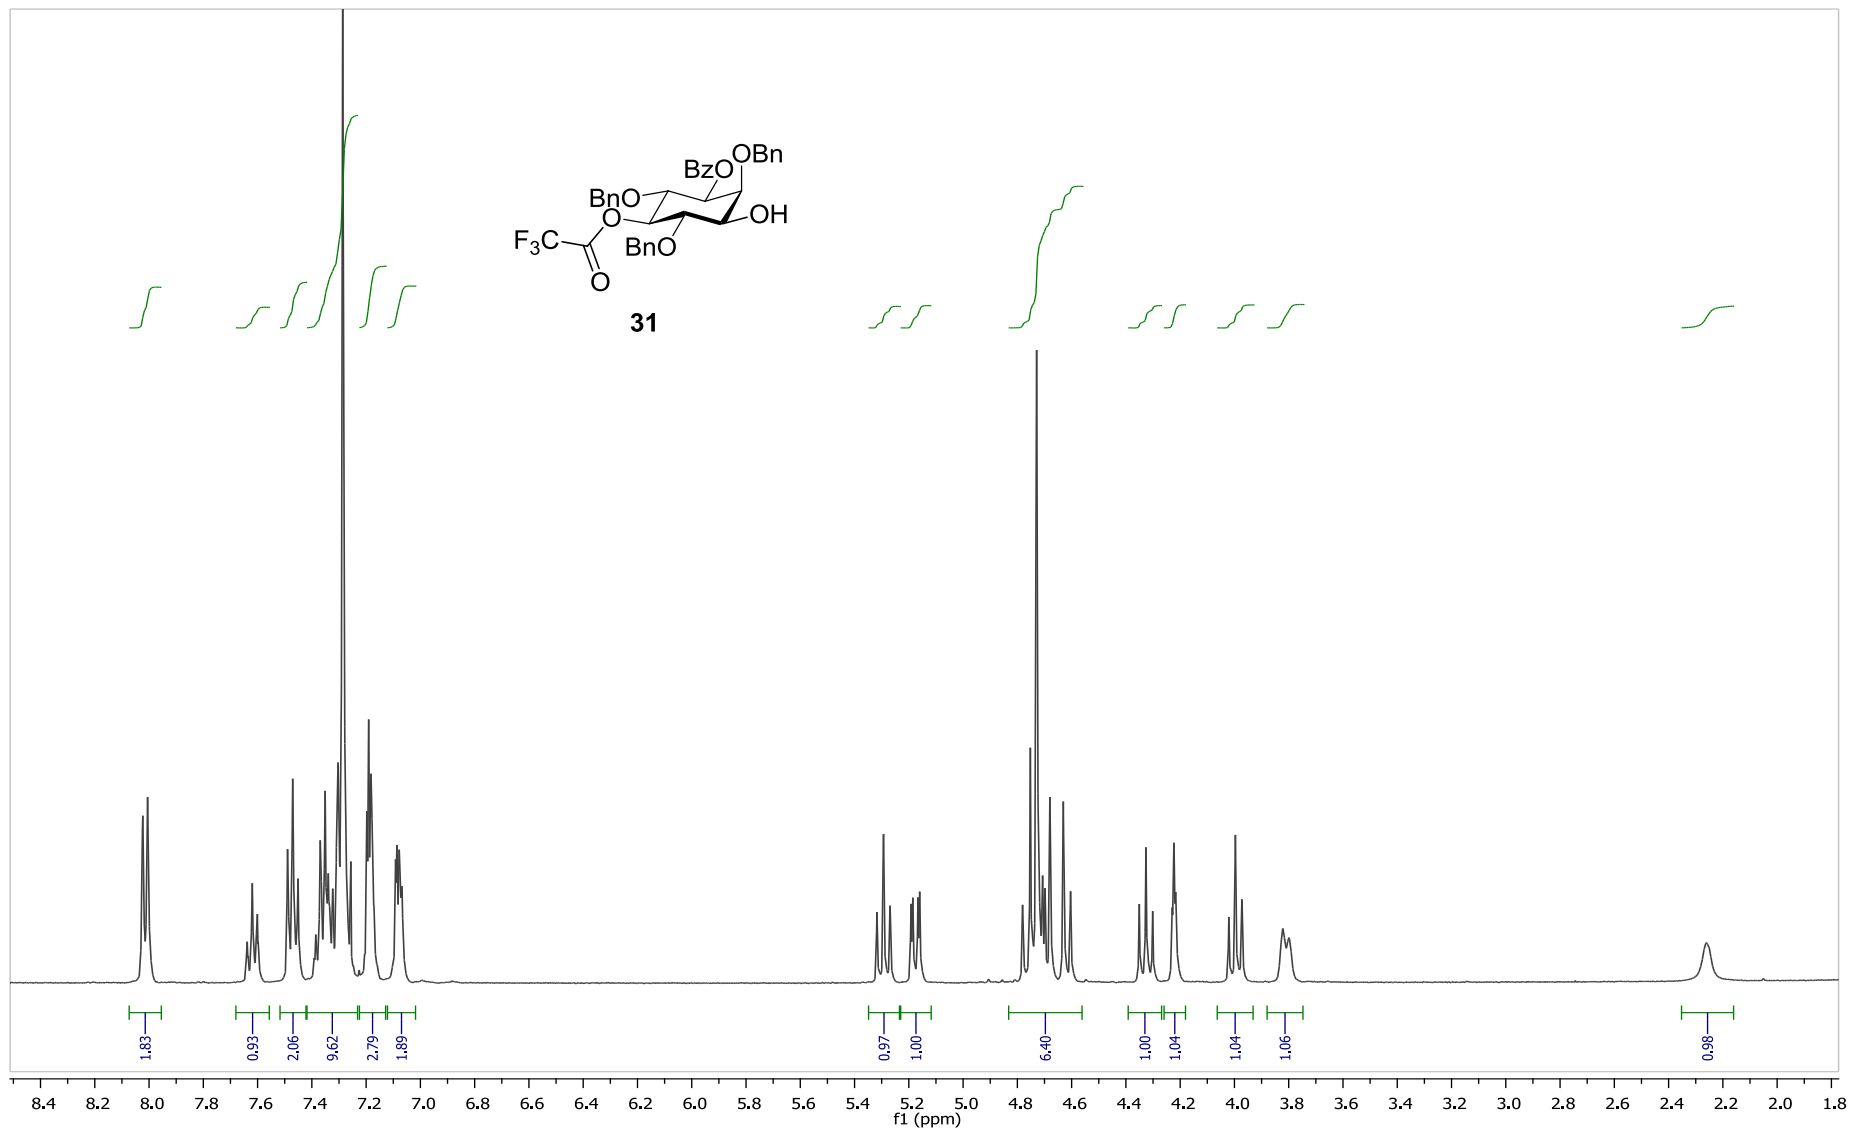

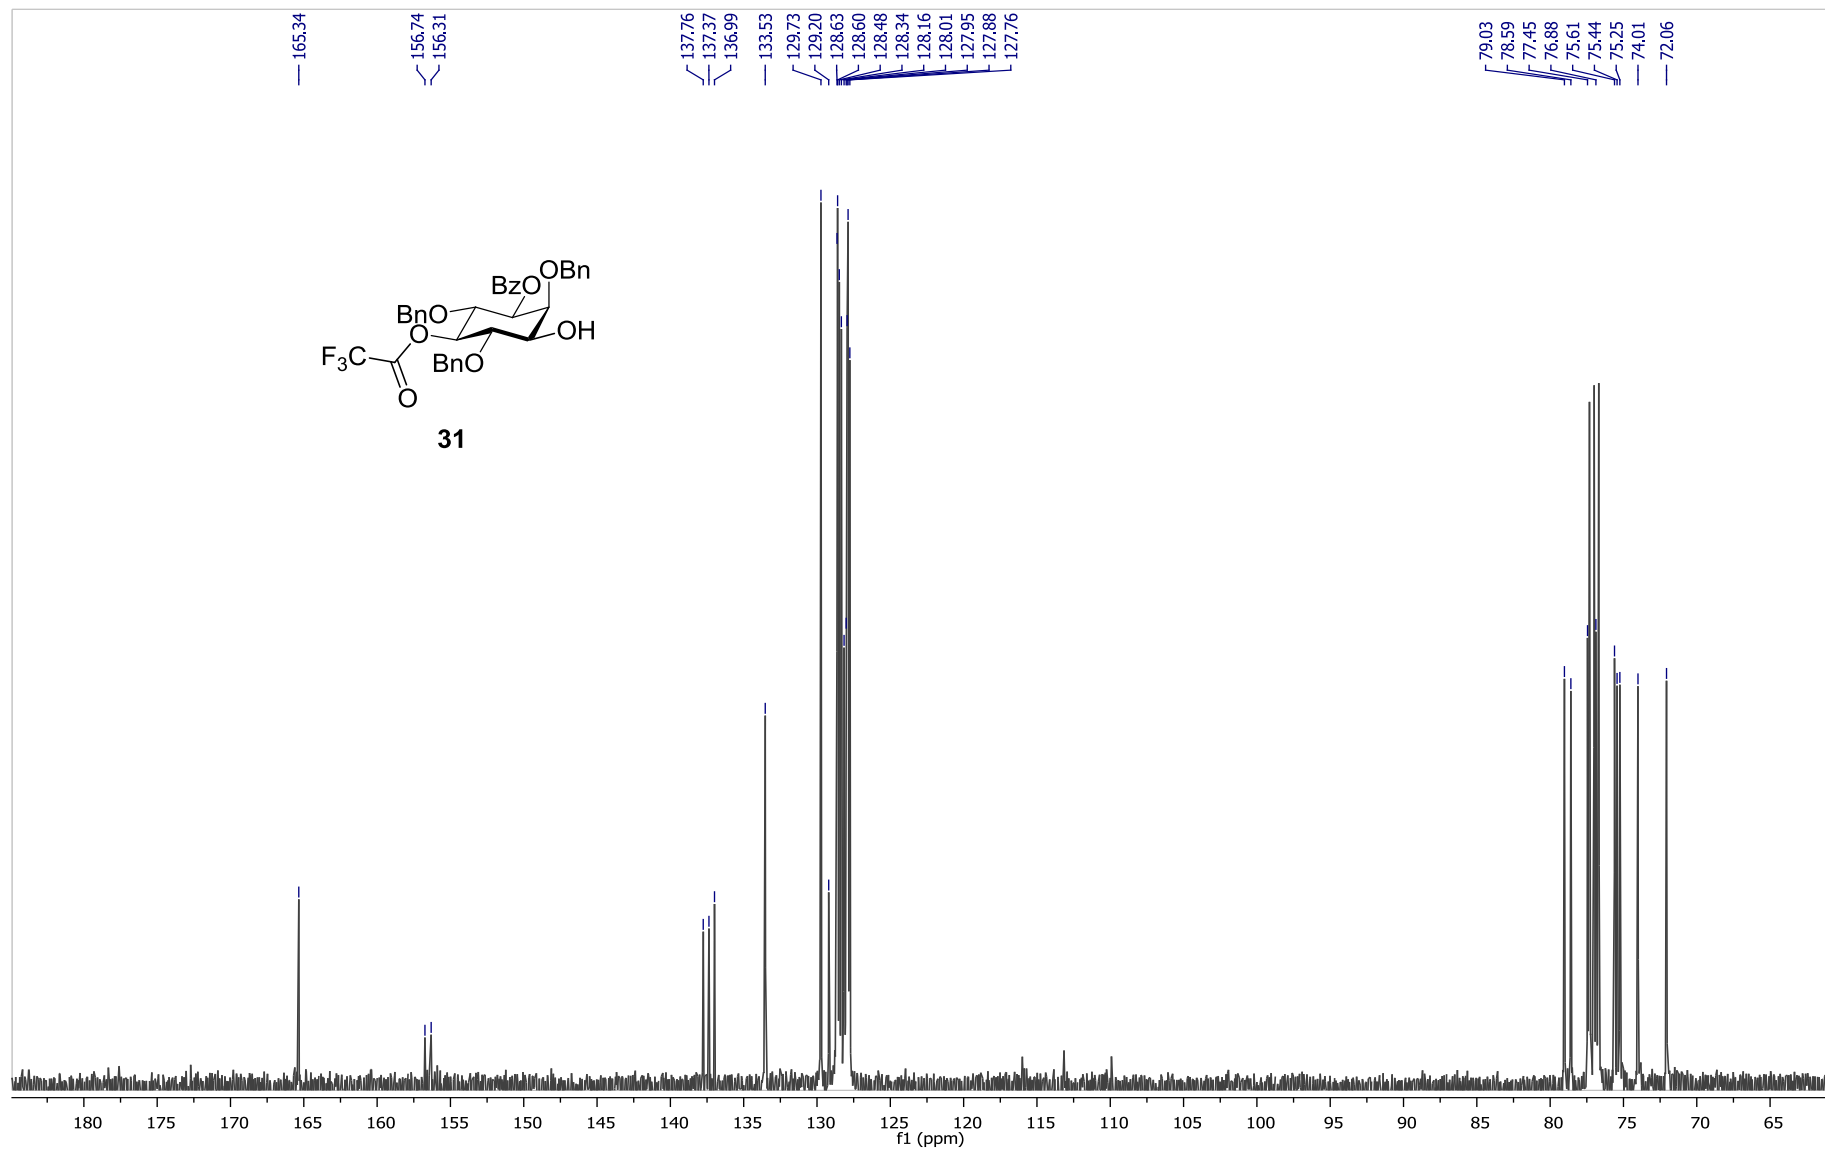

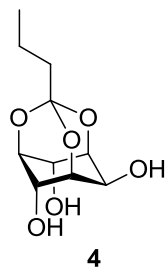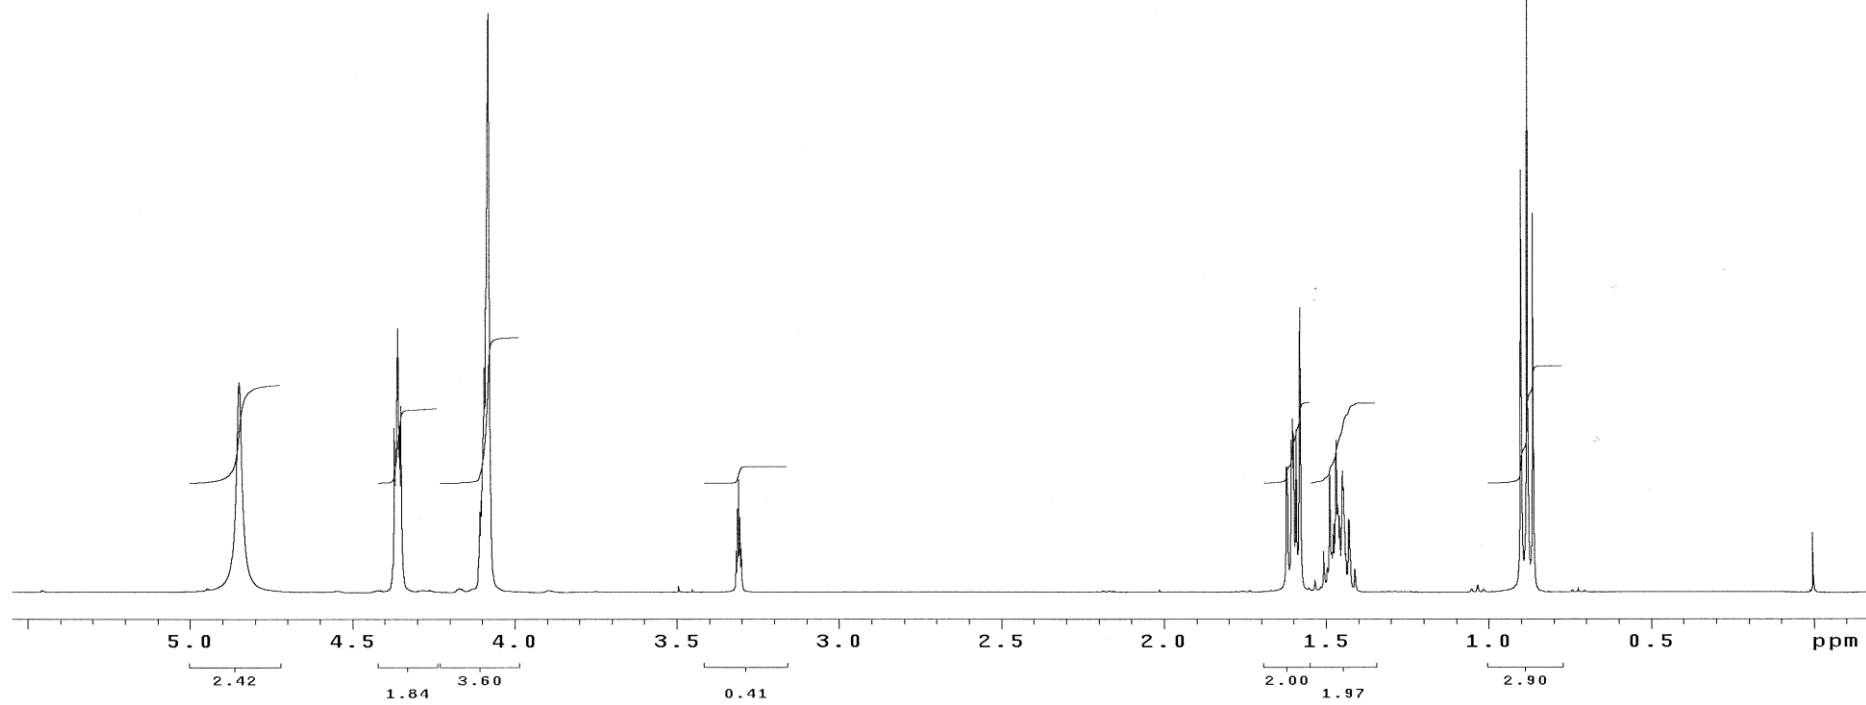

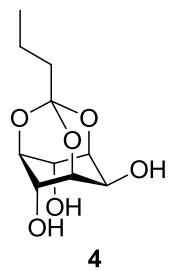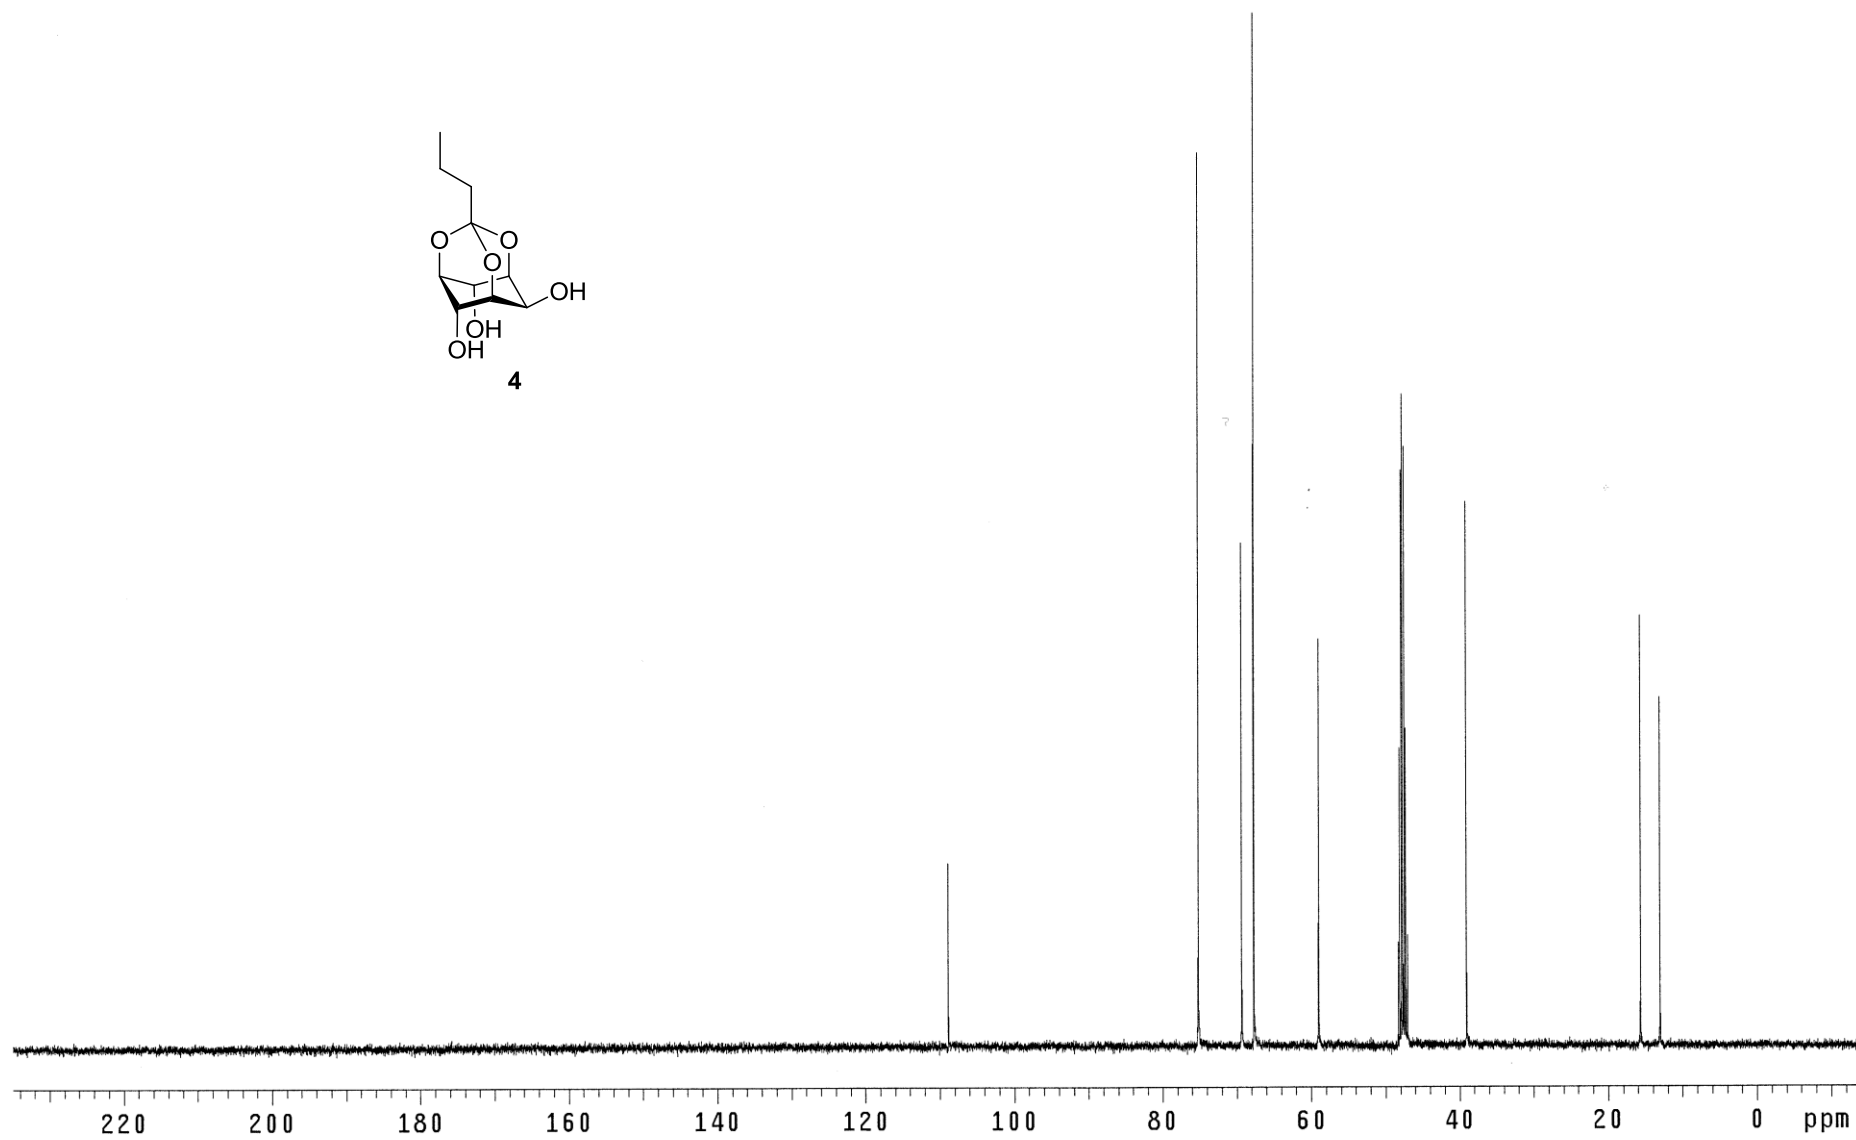



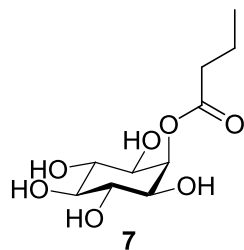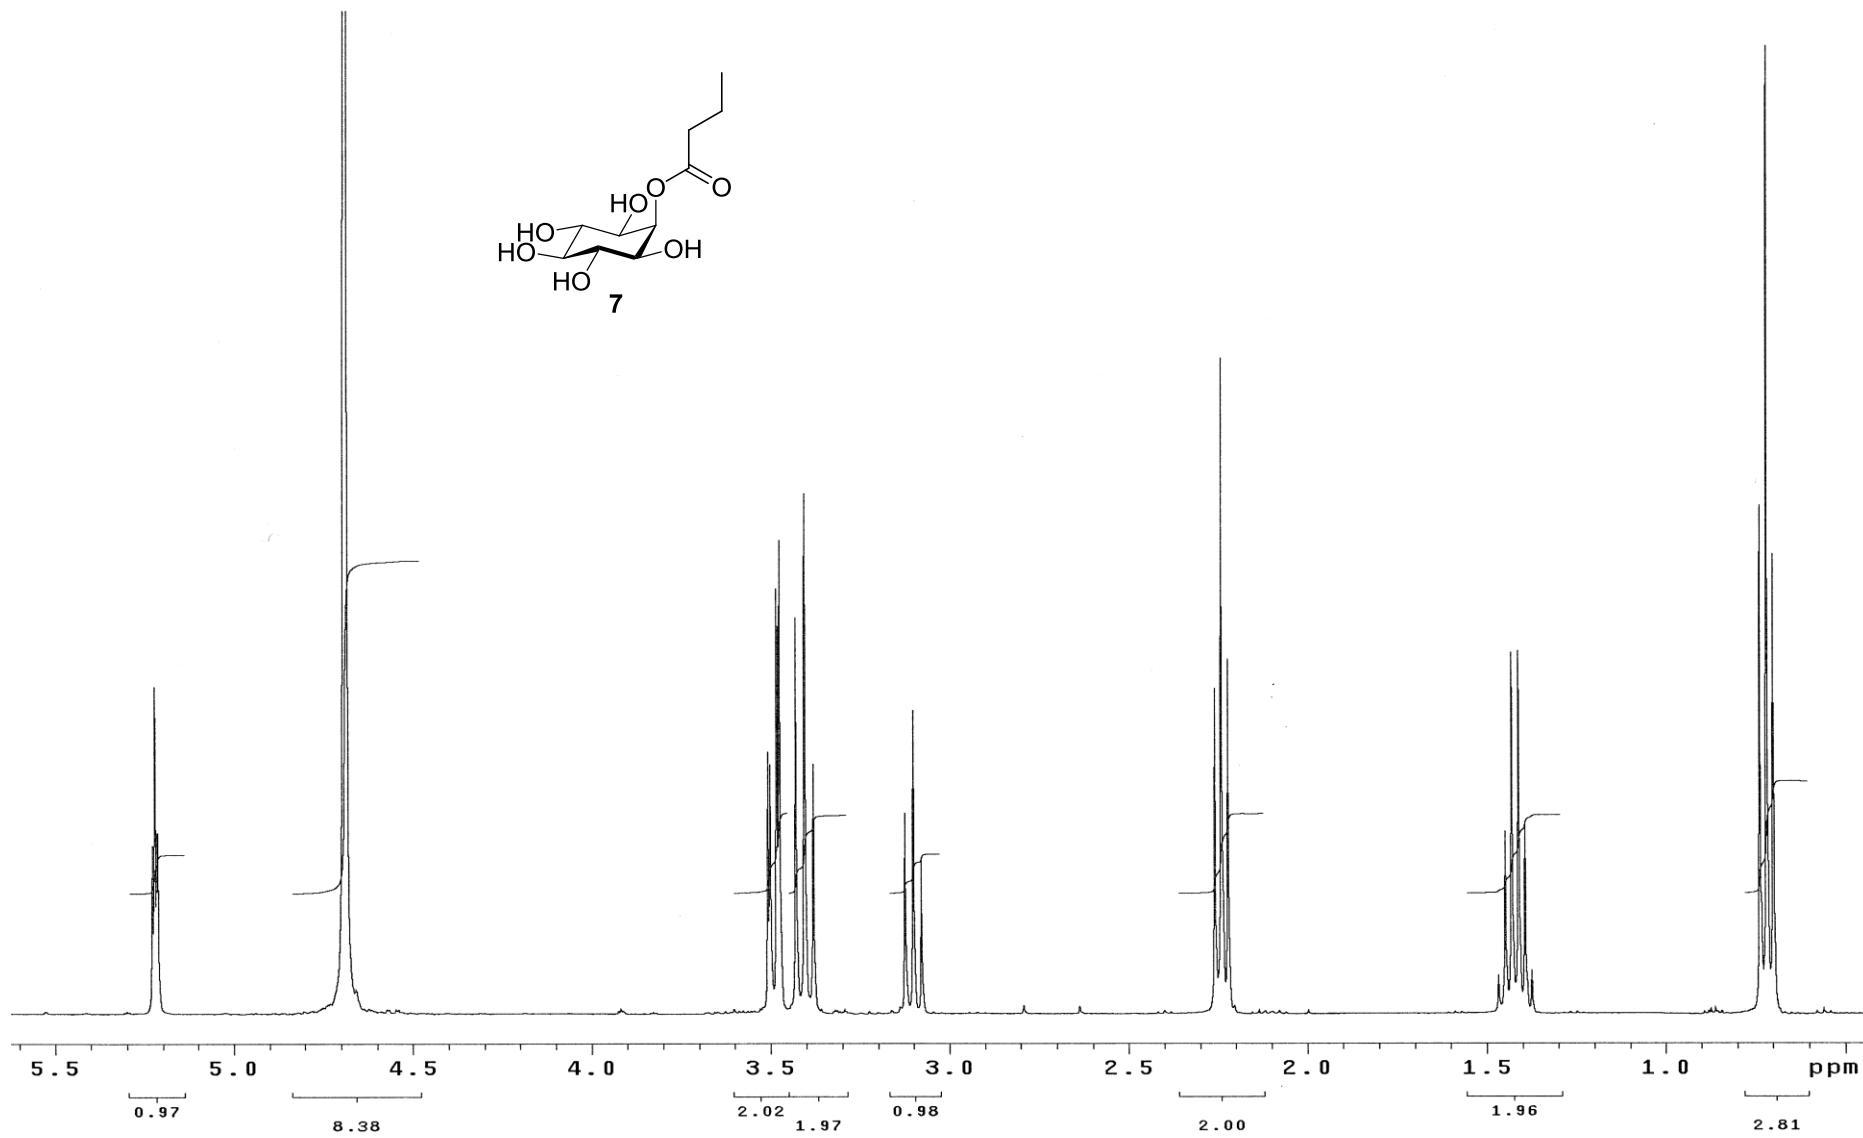

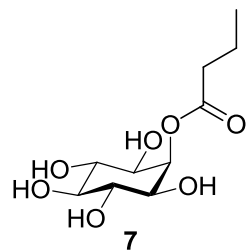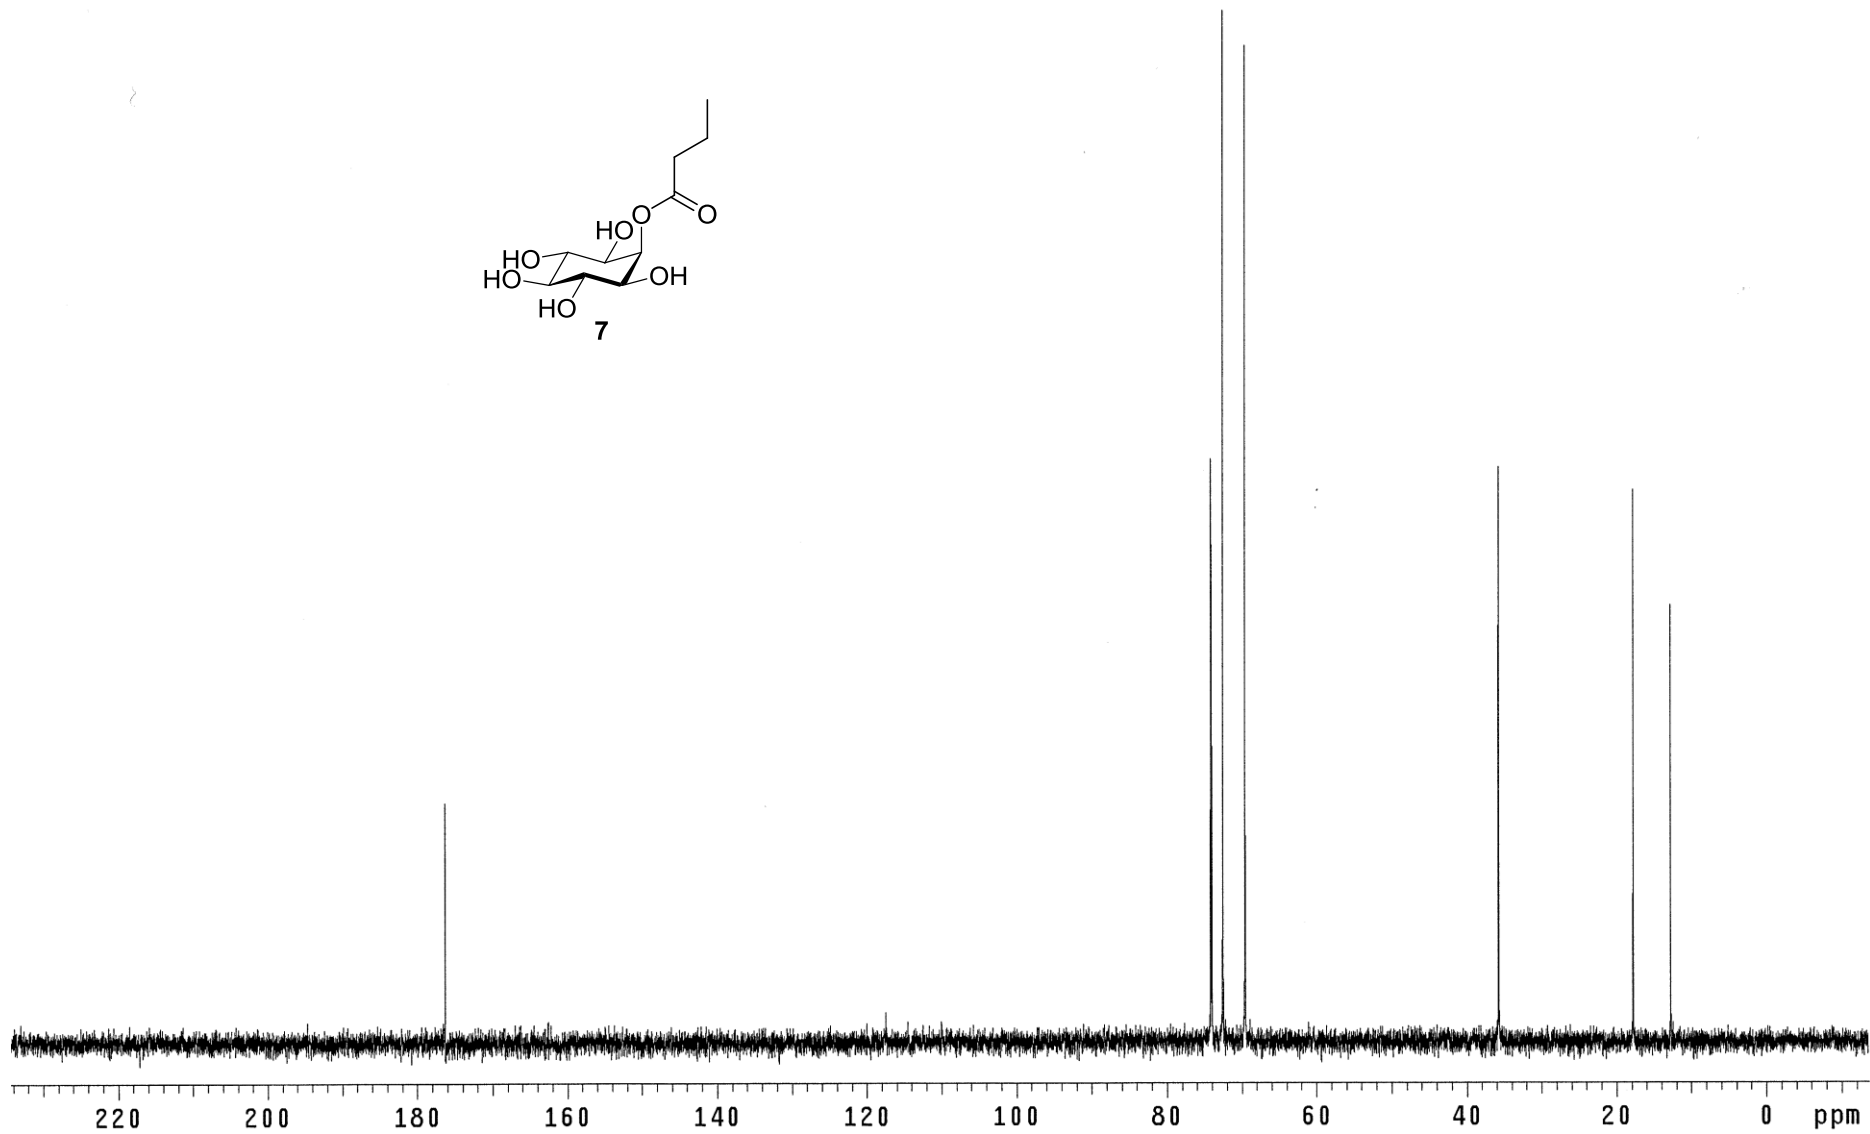

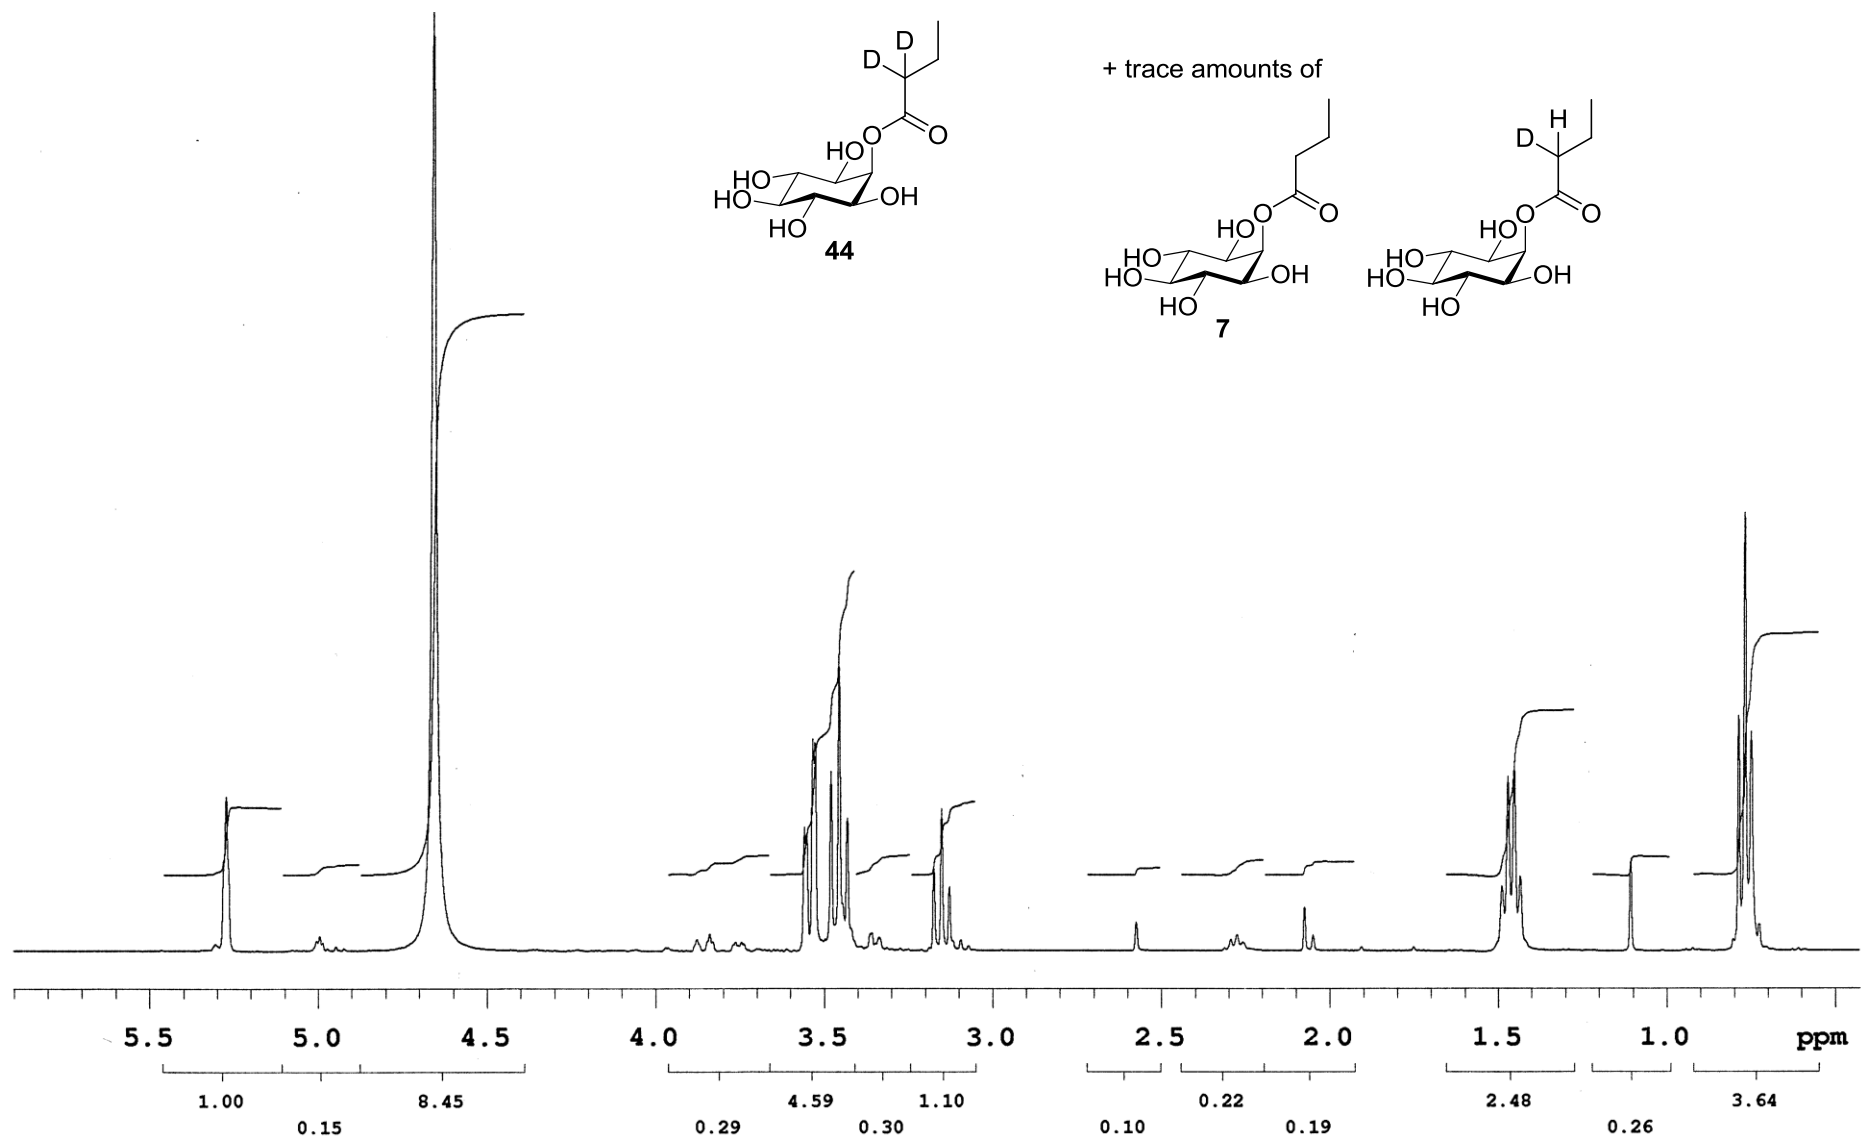

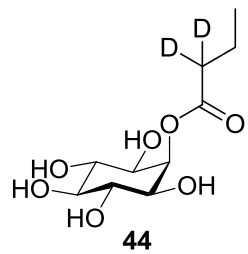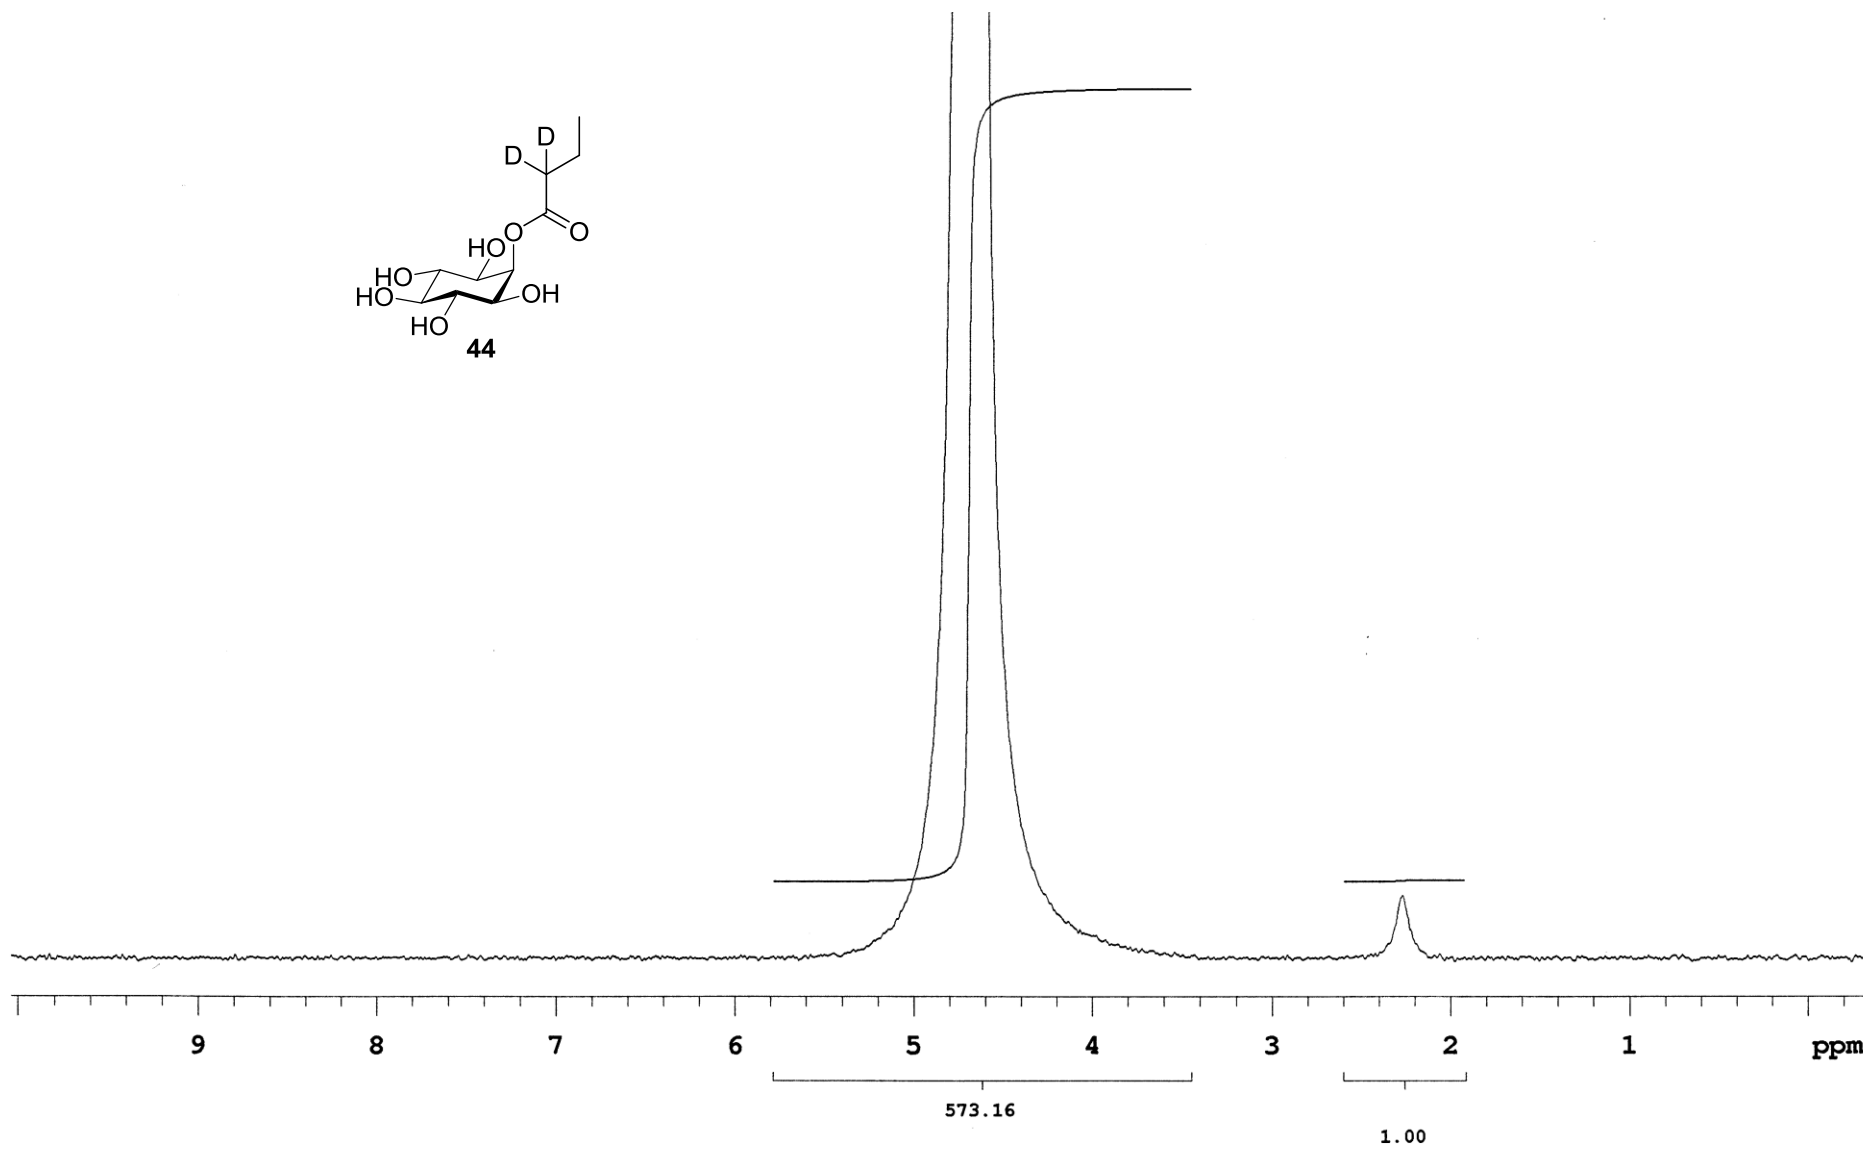

S28

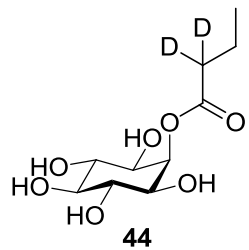

+ trace amounts of

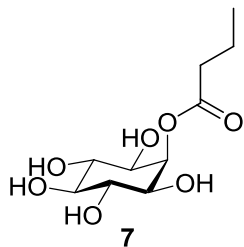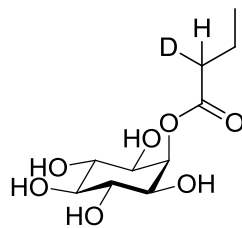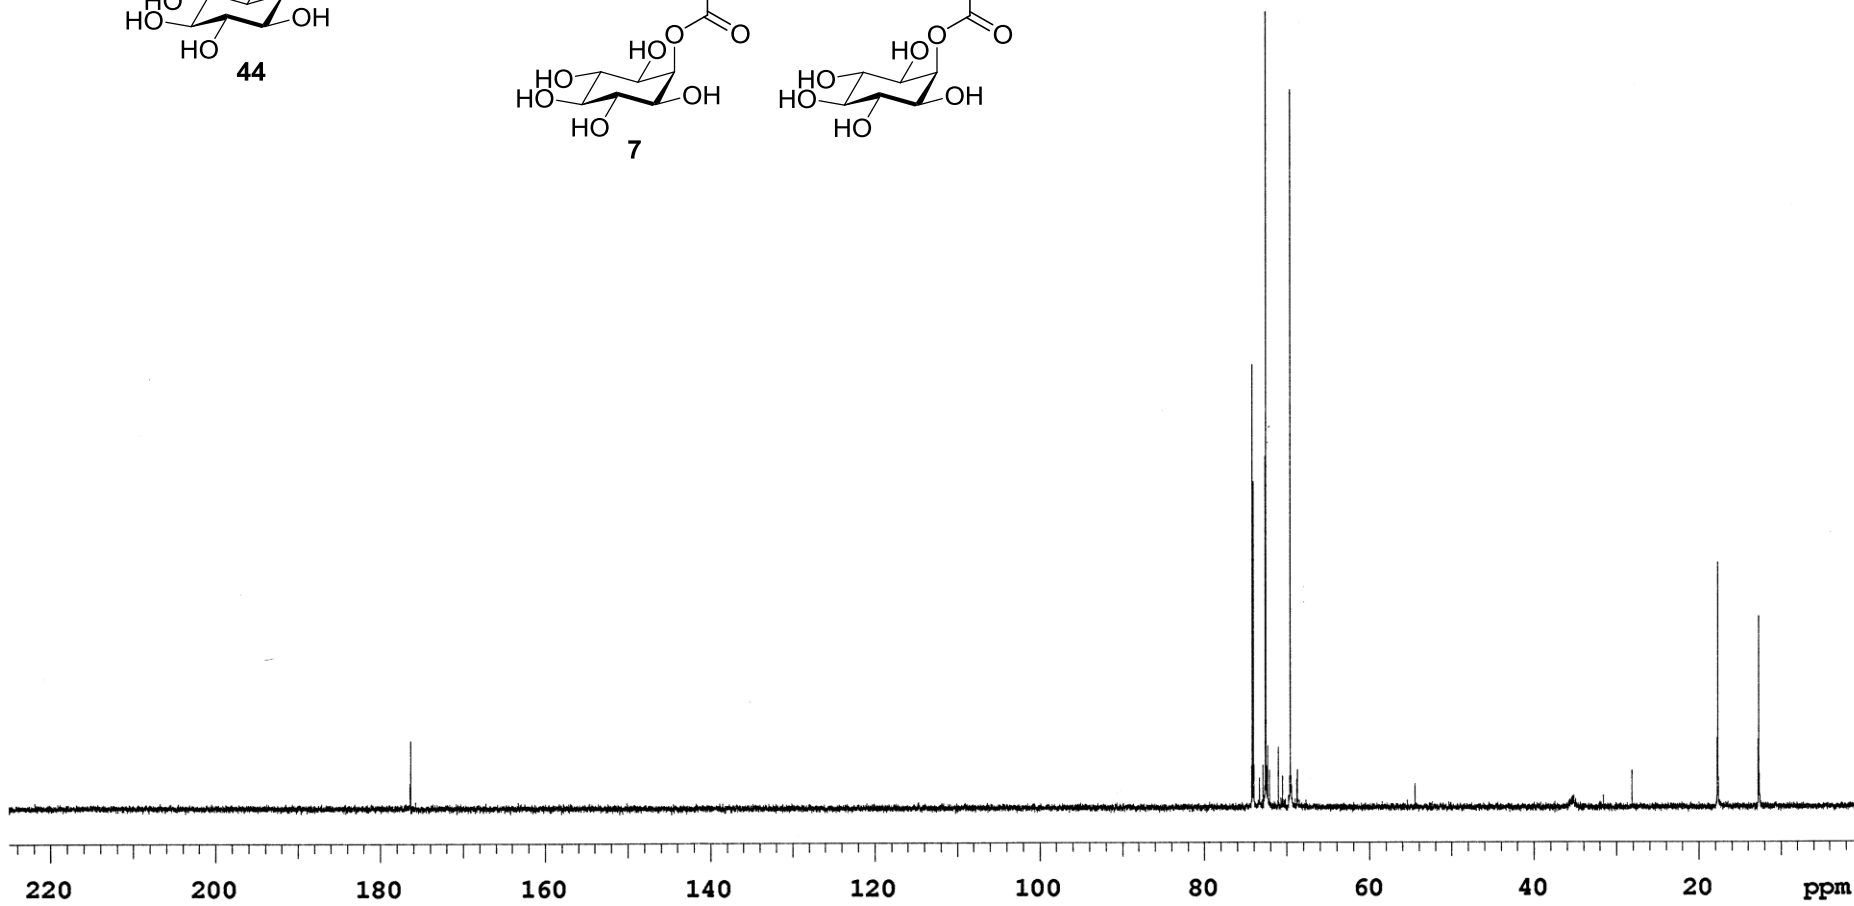

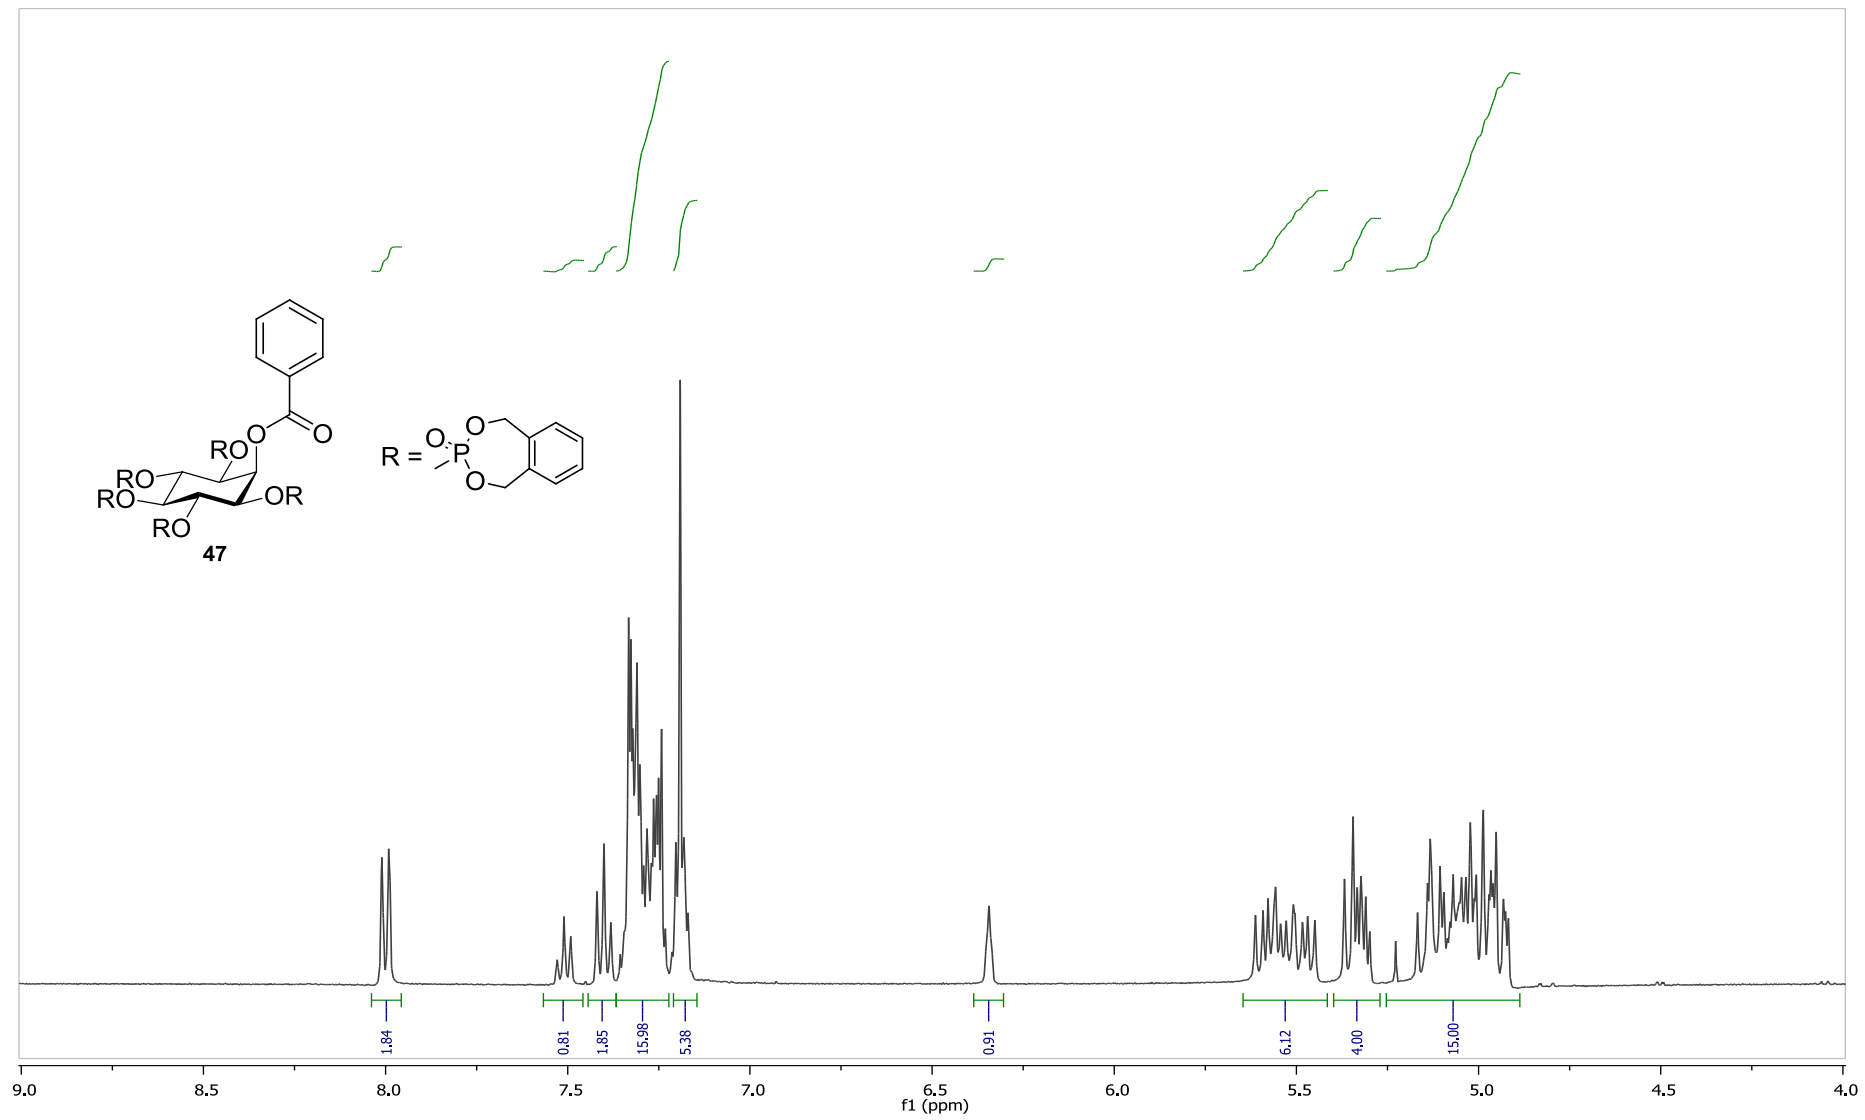

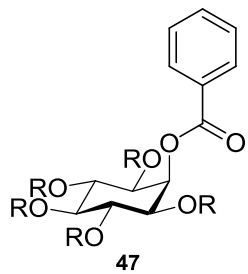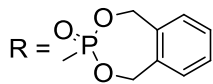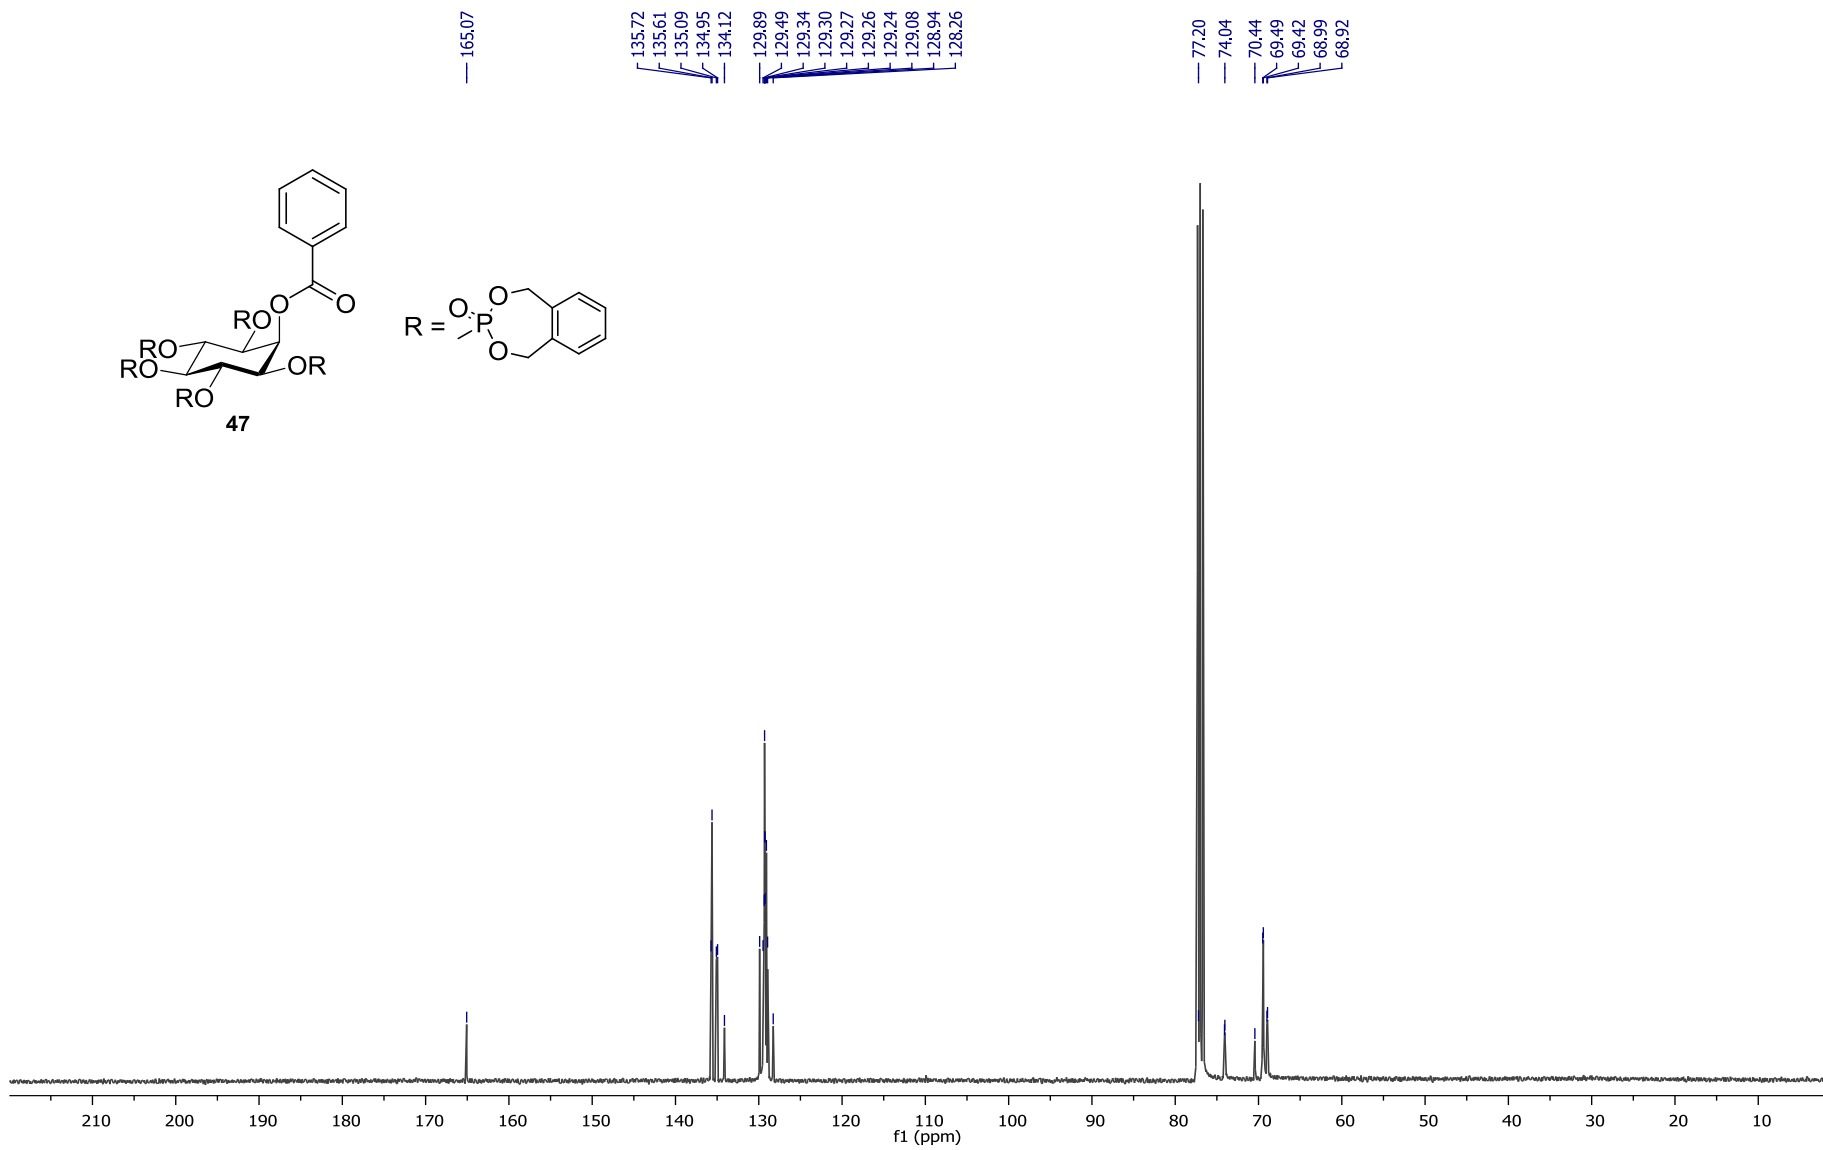

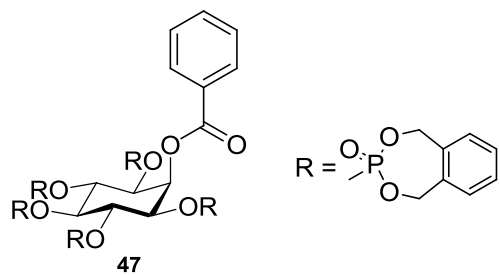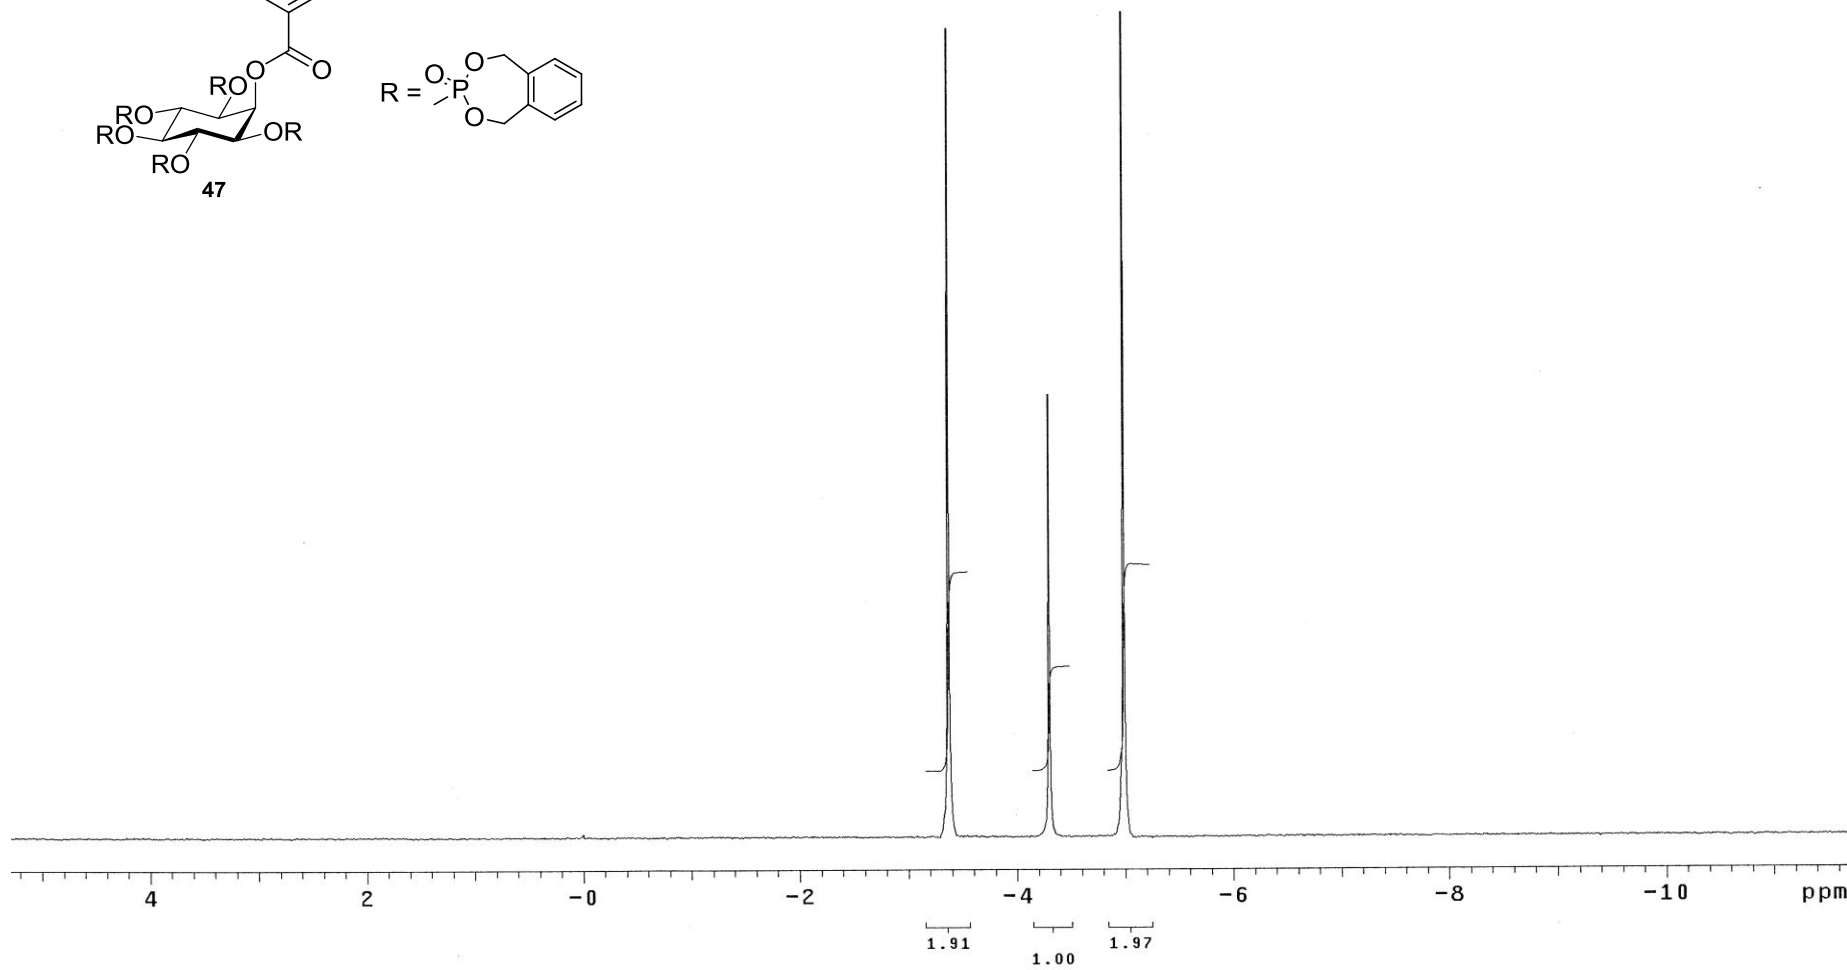



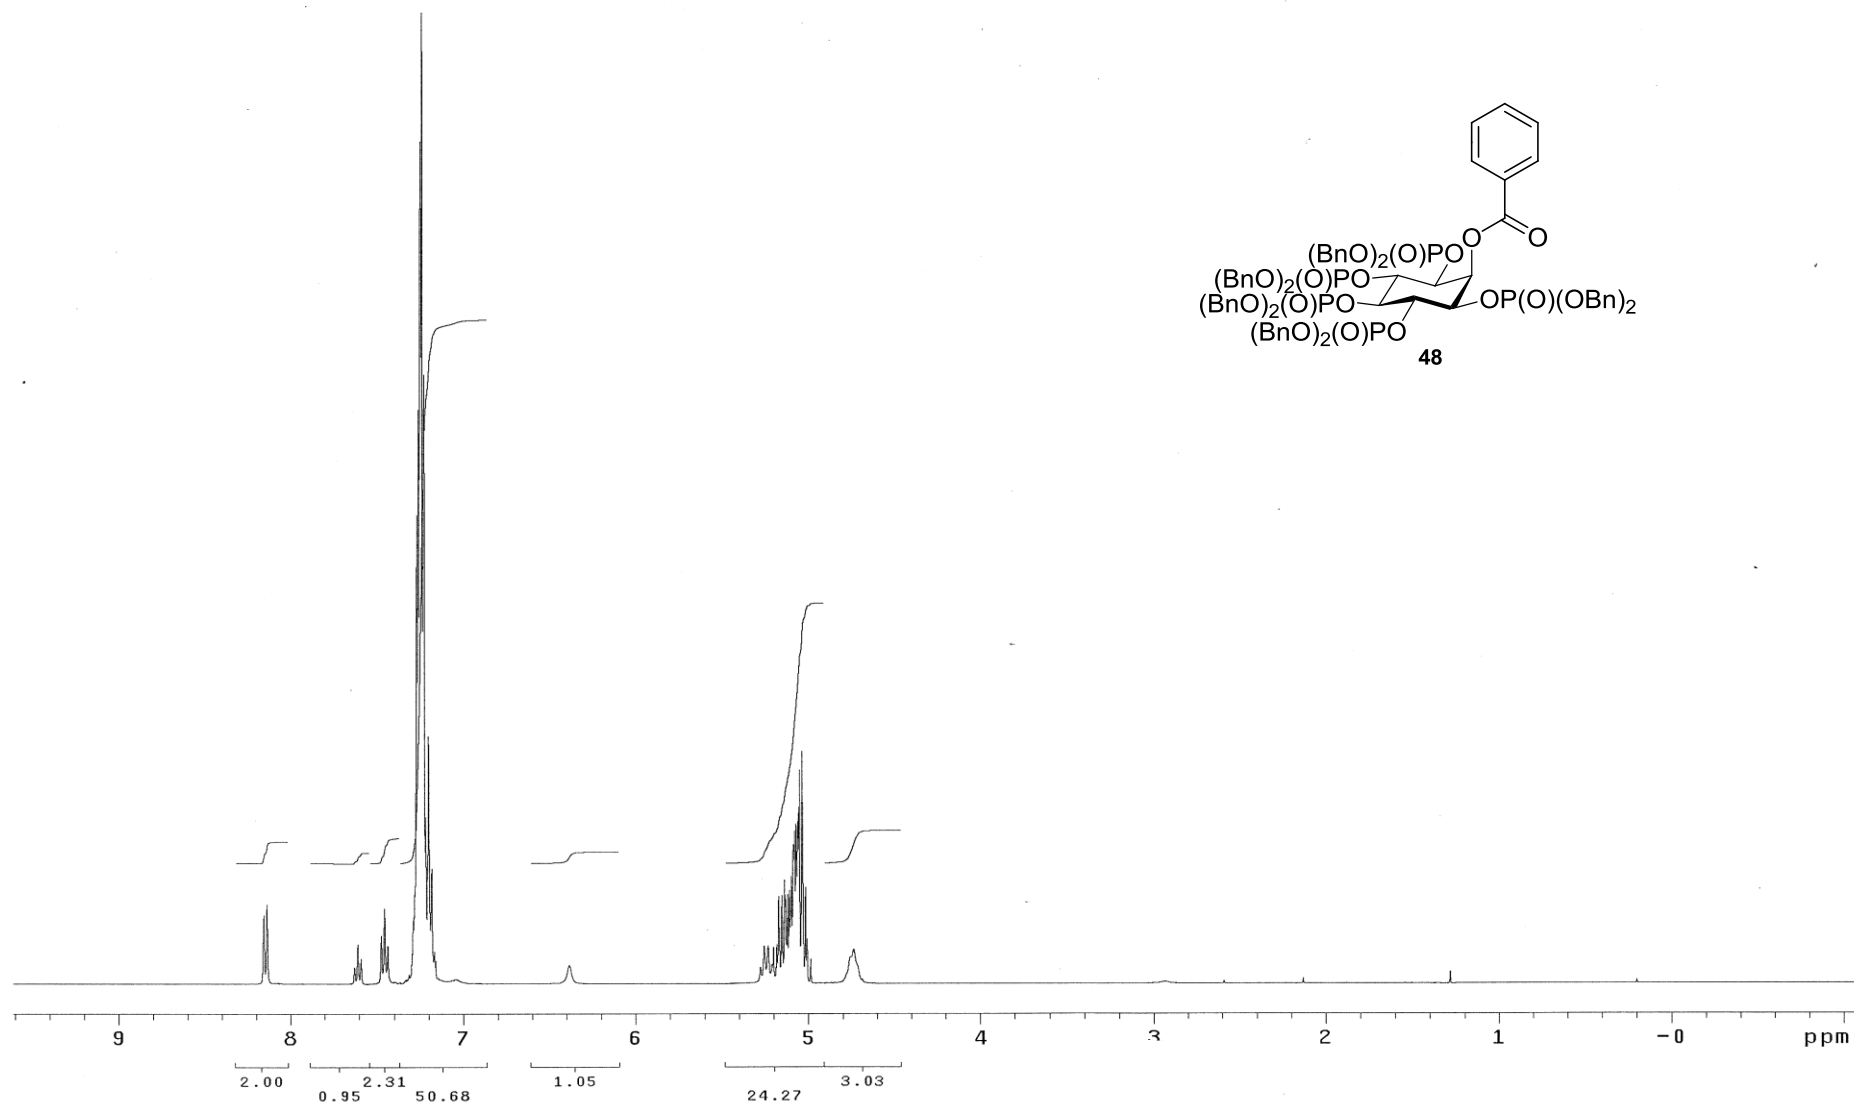

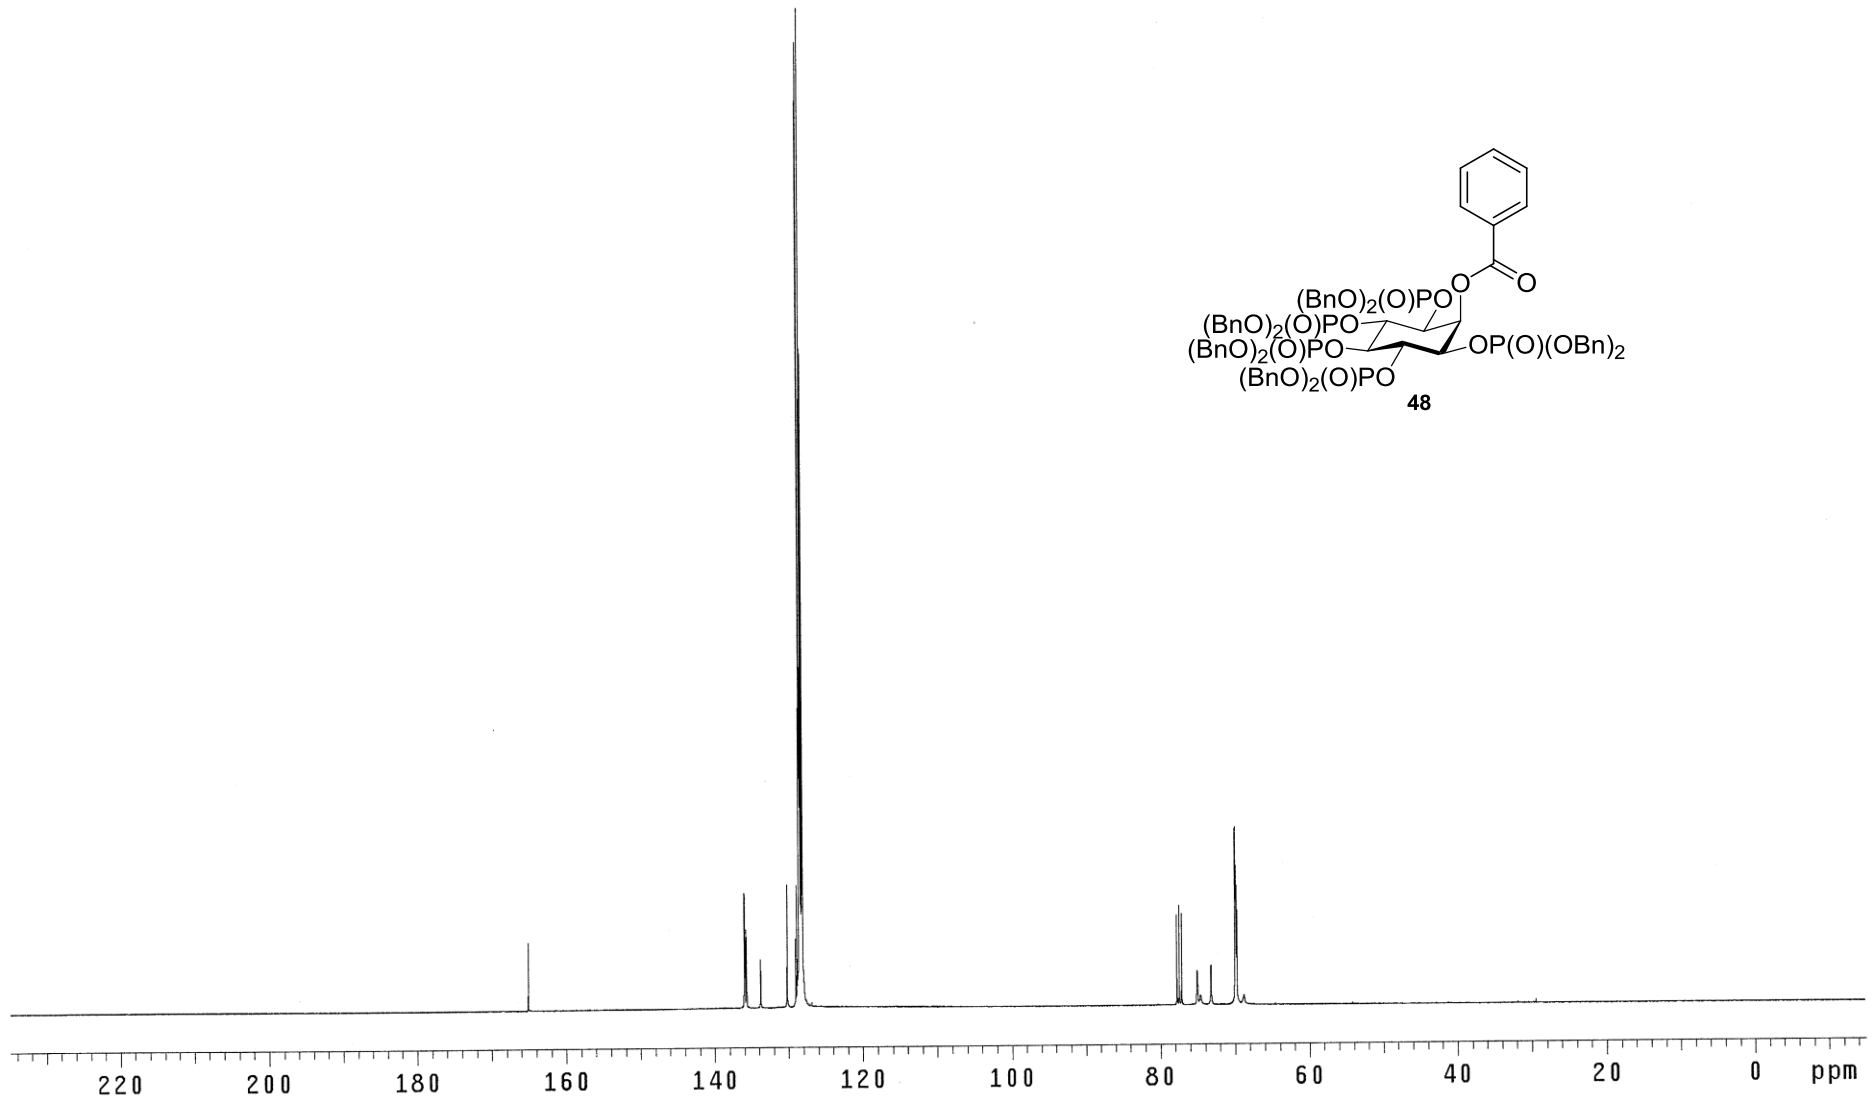

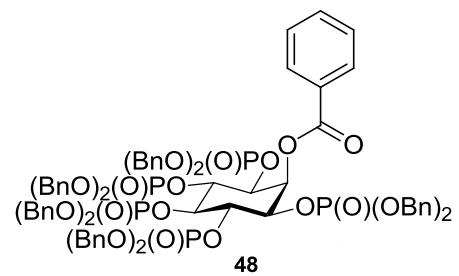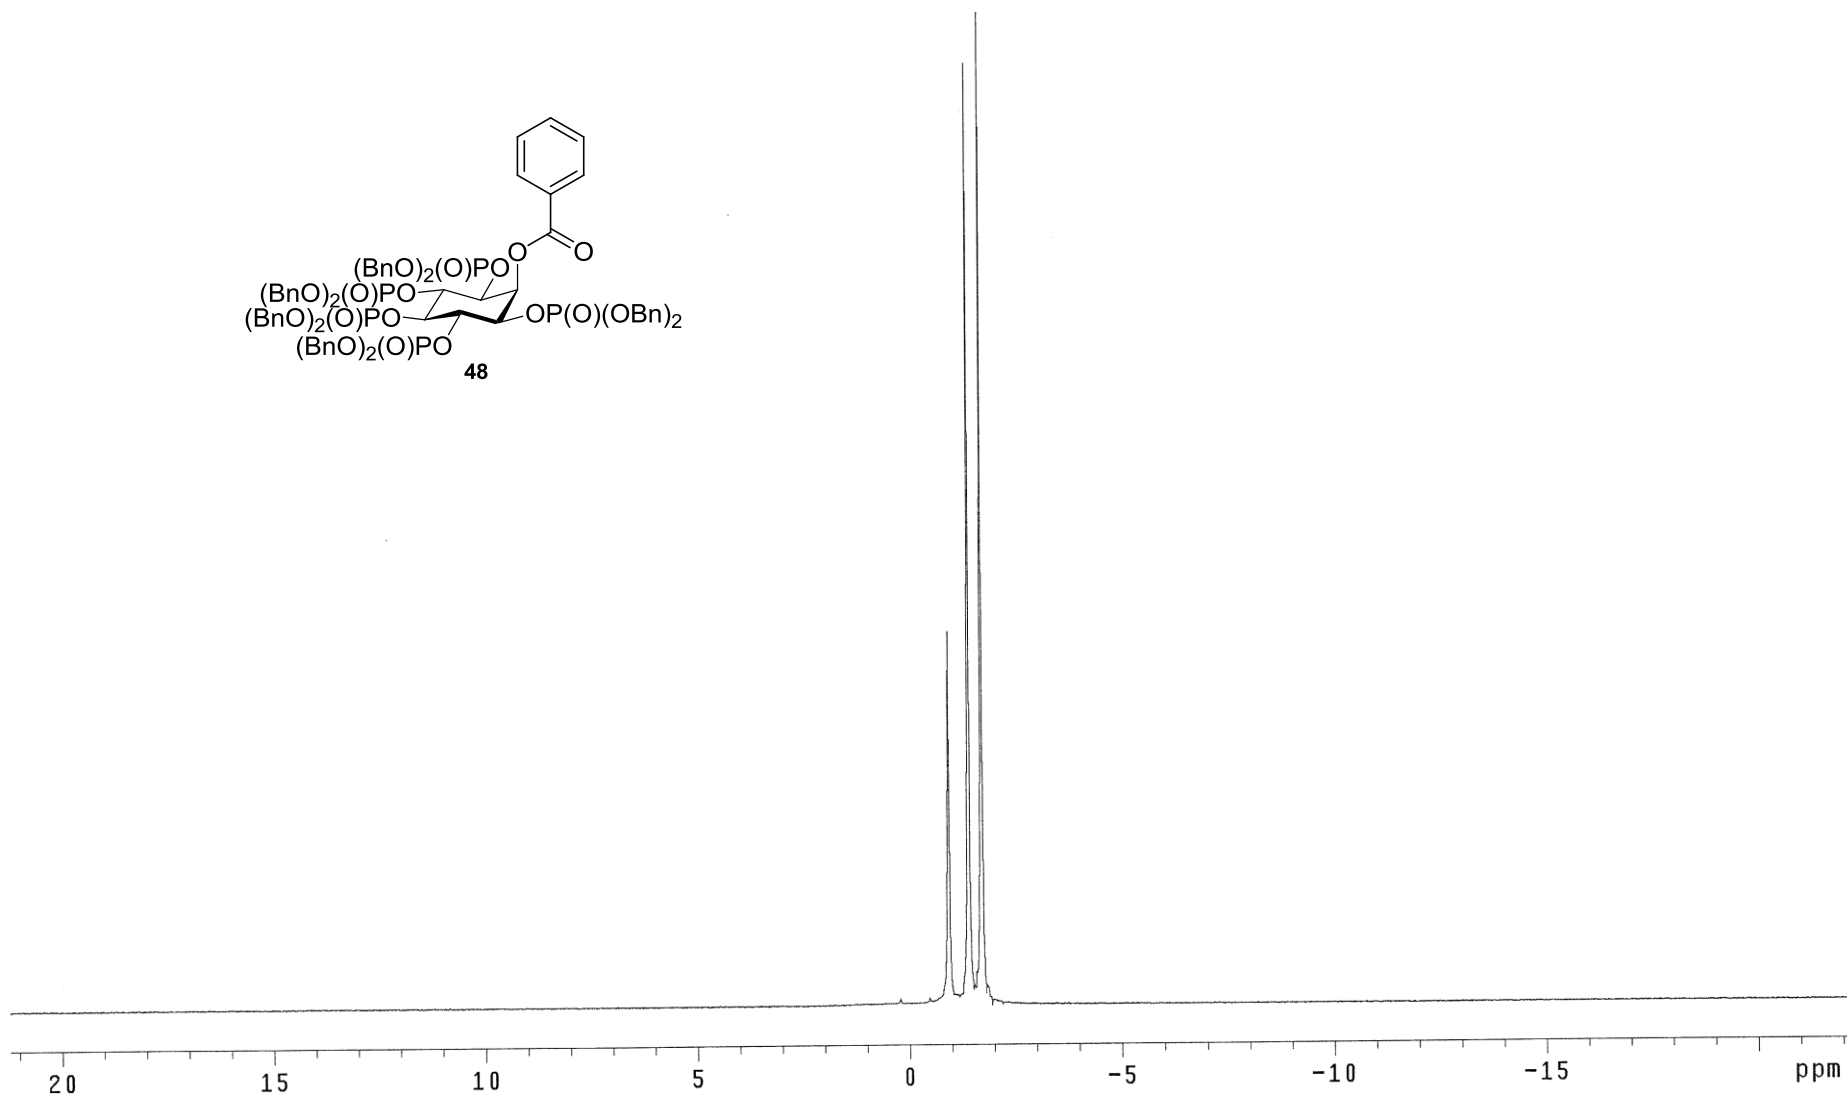

S35

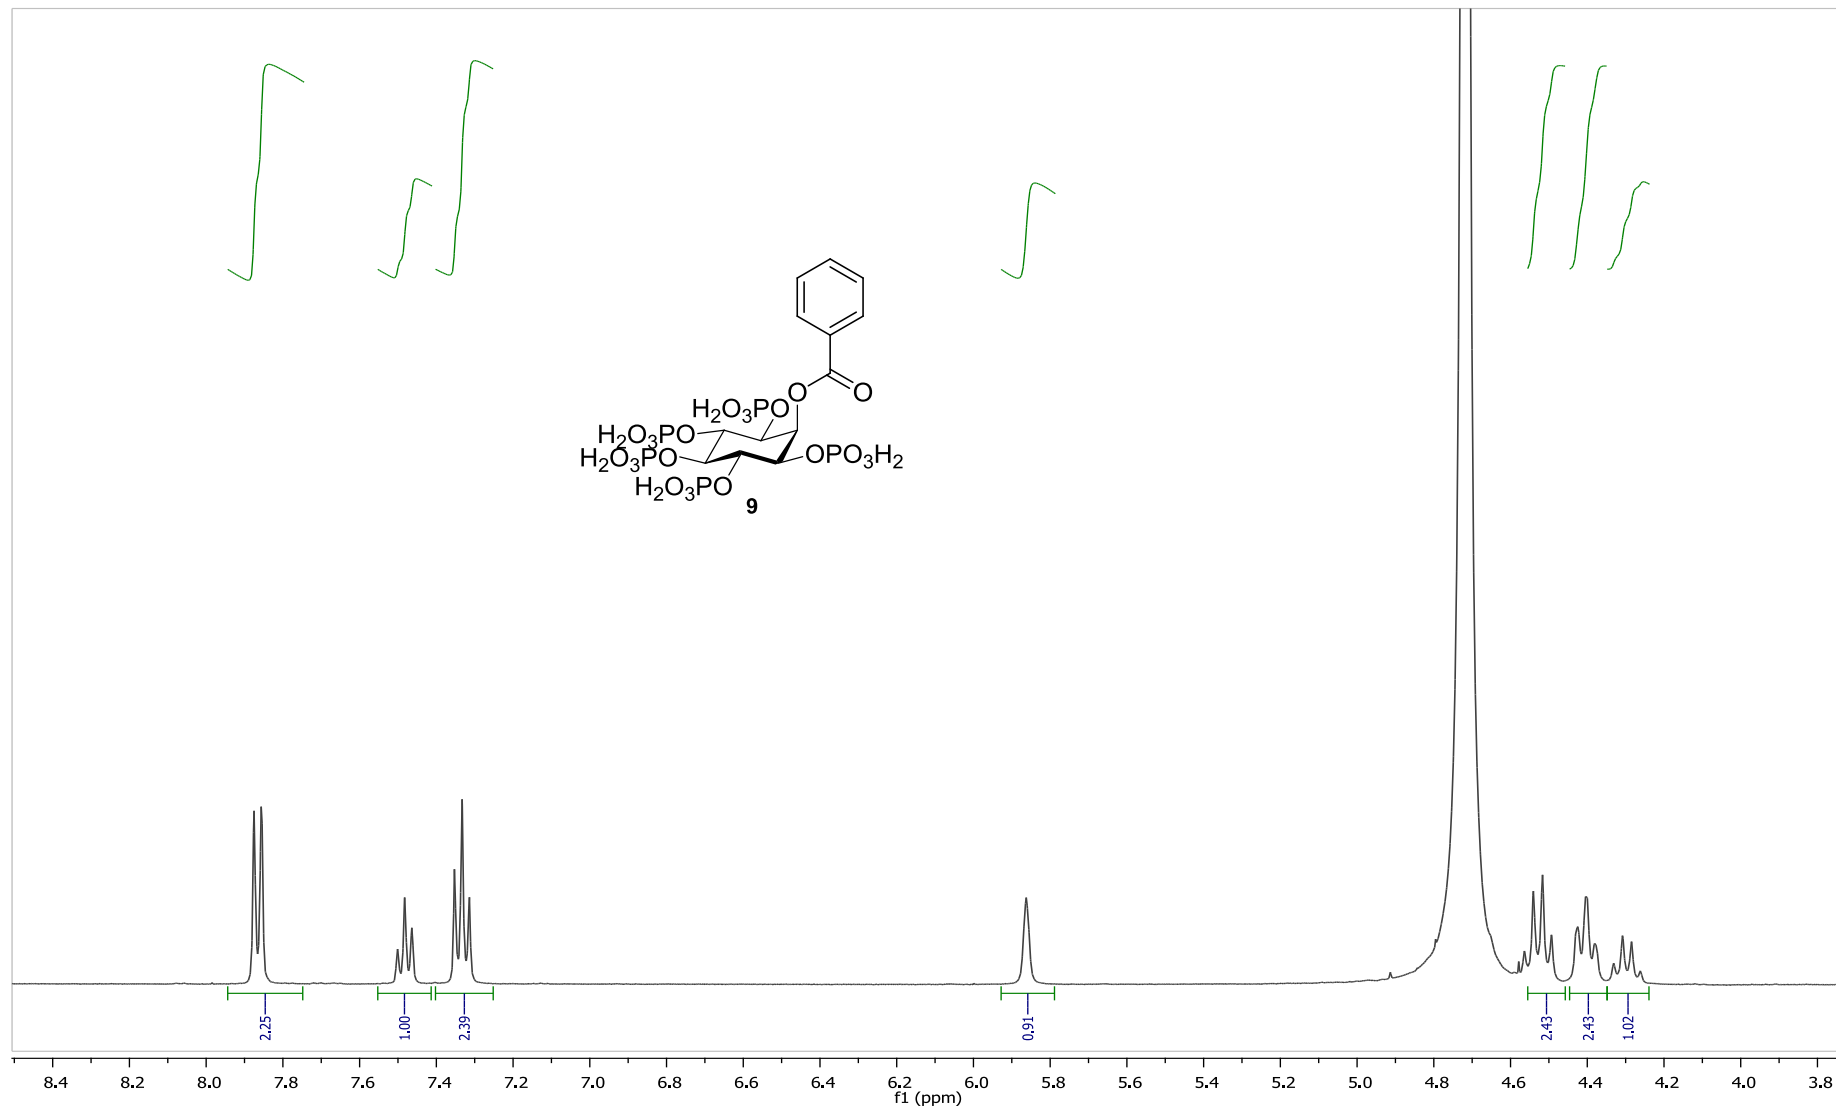

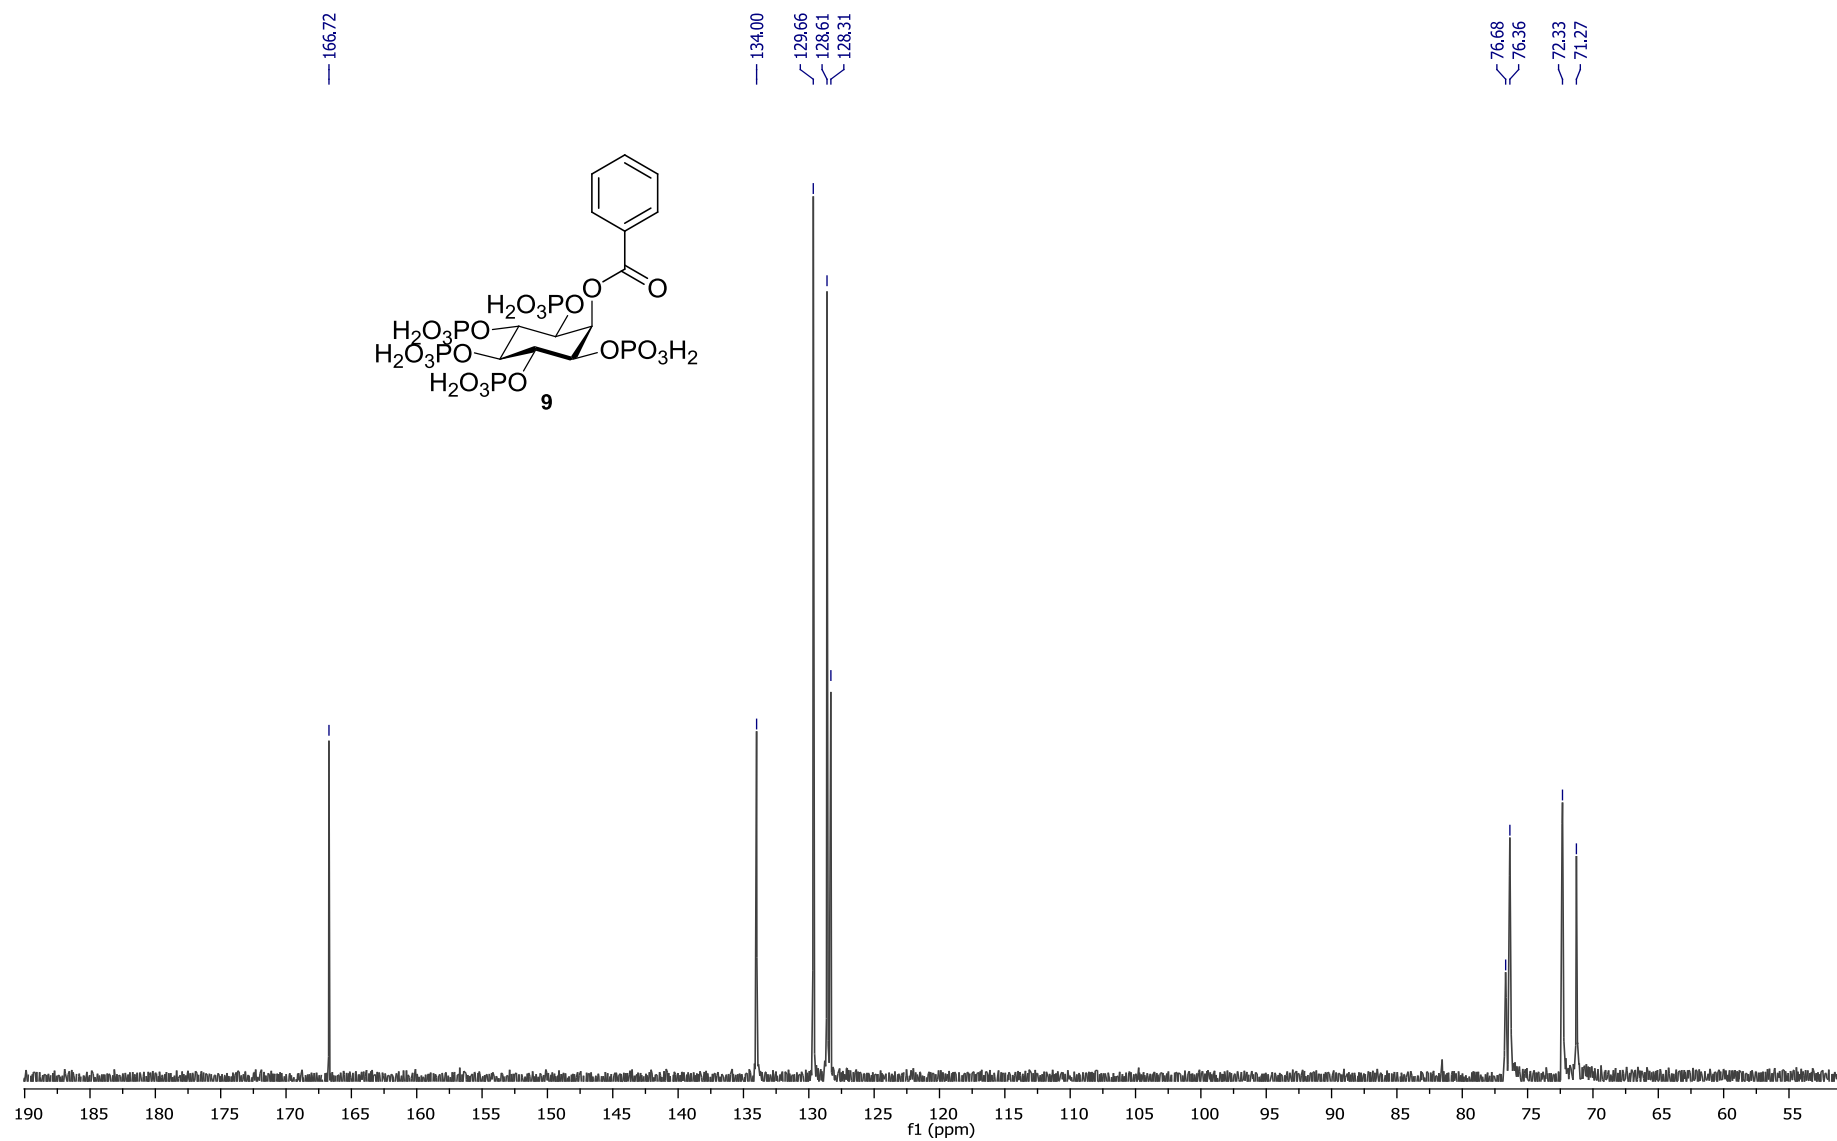

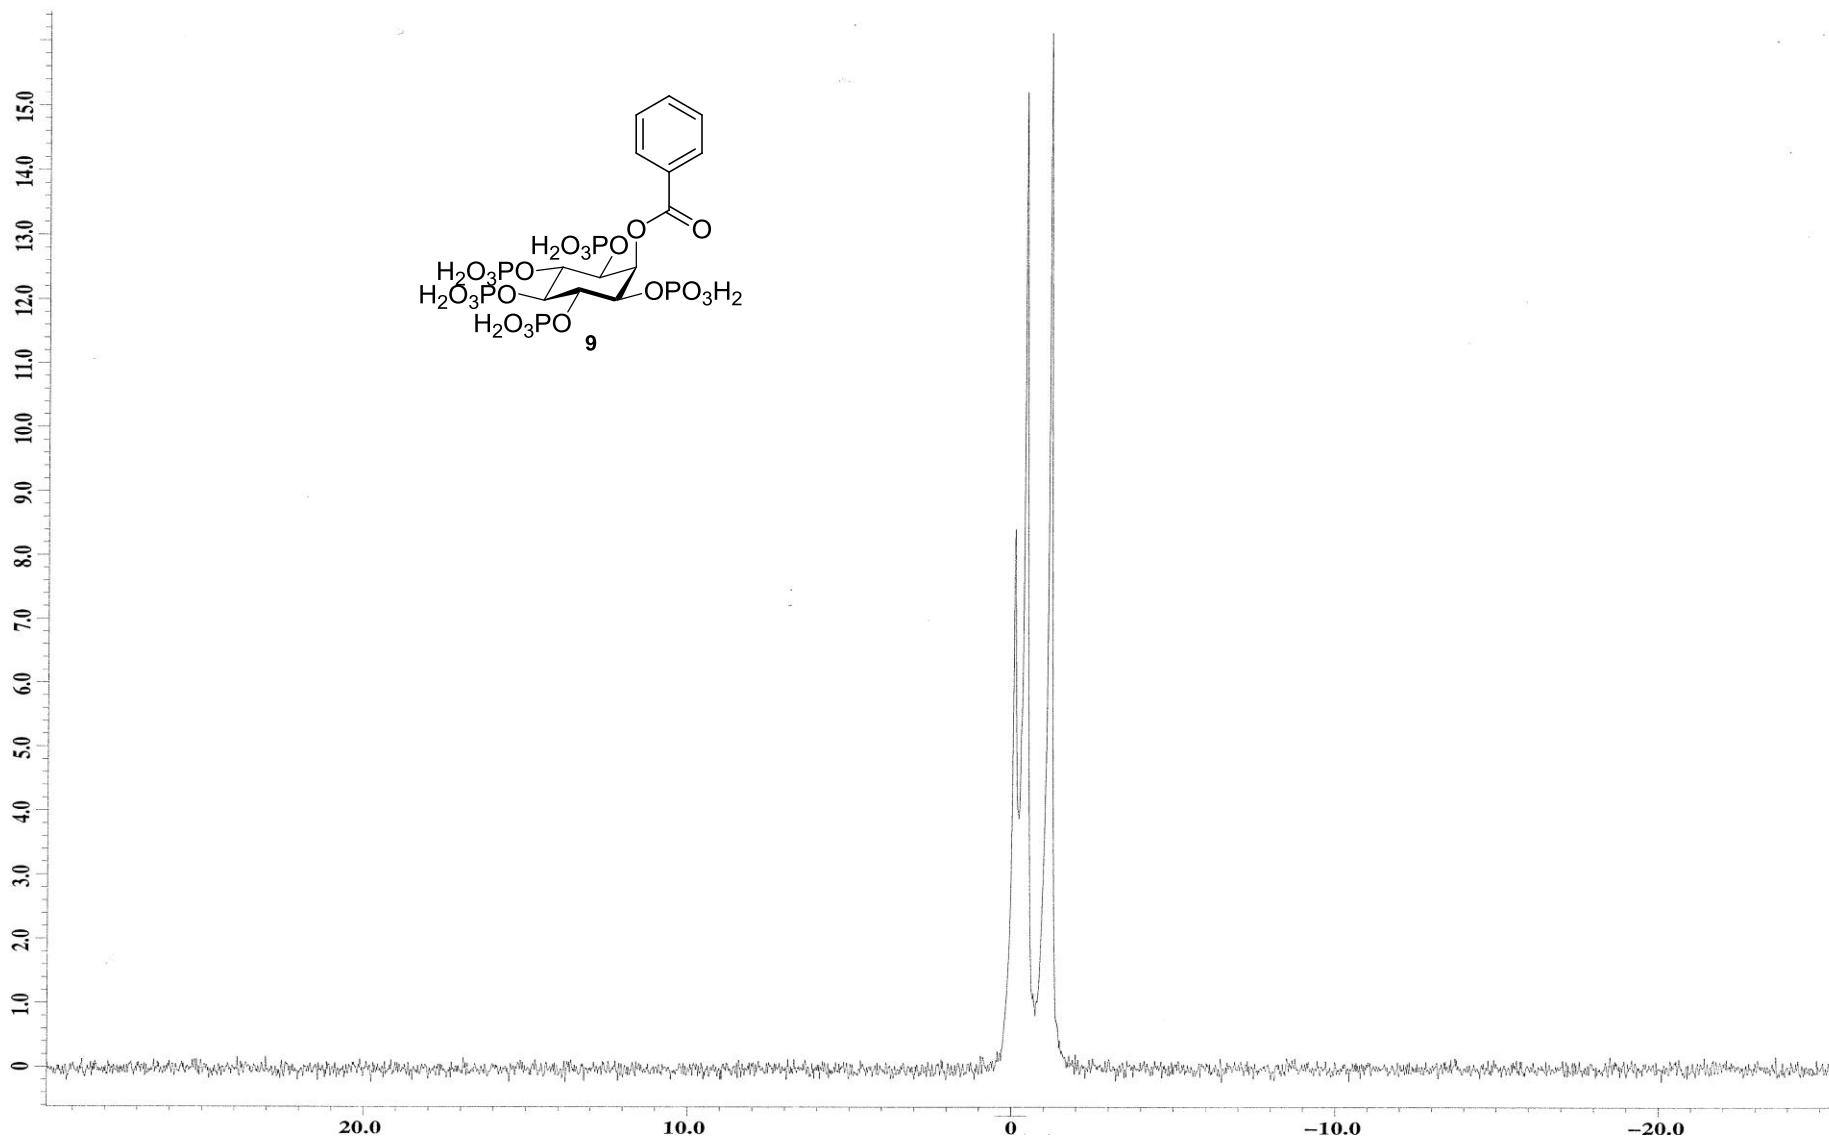

### X-ray Crystallographic data for Compound 7

**Table 1.** Crystal data and structure refinement for Compound 7.

|                                   |                                                                                                    |
|-----------------------------------|----------------------------------------------------------------------------------------------------|
| Identification code               | k11farm8                                                                                           |
| Empirical formula                 | C <sub>10</sub> H <sub>18</sub> O <sub>7</sub>                                                     |
| Formula weight                    | 250.24                                                                                             |
| Temperature                       | 298(2) K                                                                                           |
| Wavelength                        | 0.71073 Å                                                                                          |
| Crystal system                    | Monoclinic                                                                                         |
| Space group                       | P2 <sub>1</sub> /a                                                                                 |
| Unit cell dimensions              | a = 11.0090(3) Å alpha = 90°<br>b = 9.0330(3) Å beta = 105.775(1)°<br>c = 12.5370(4) Å gamma = 90° |
| Volume                            | 1199.78(6) Å <sup>3</sup>                                                                          |
| Z                                 | 4                                                                                                  |
| Density (calculated)              | 1.385 Mg/m <sup>3</sup>                                                                            |
| Absorption coefficient            | 0.118 mm <sup>-1</sup>                                                                             |
| F(000)                            | 536                                                                                                |
| Crystal size                      | 0.40 x 0.40 x 0.10 mm                                                                              |
| Theta range for data collection   | 4.06 to 27.42°                                                                                     |
| Index ranges                      | -14 ≤ h ≤ 14; -11 ≤ k ≤ 11; -16 ≤ l ≤ 16                                                           |
| Reflections collected             | 16216                                                                                              |
| Independent reflections           | 2710 [R(int) = 0.0541]                                                                             |
| Reflections observed (>2sigma)    | 2156                                                                                               |
| Data Completeness                 | 0.990                                                                                              |
| Absorption correction             | Semi-empirical from equivalents                                                                    |
| Max. and min. transmission        | 0.972 and 0.843                                                                                    |
| Refinement method                 | Full-matrix least-squares on F <sup>2</sup>                                                        |
| Data / restraints / parameters    | 2710 / 14 / 178                                                                                    |
| Goodness-of-fit on F <sup>2</sup> | 1.049                                                                                              |
| Final R indices [I > 2sigma(I)]   | R1 = 0.0429 wR2 = 0.1104                                                                           |
| R indices (all data)              | R1 = 0.0560 wR2 = 0.1212                                                                           |
| Largest diff. peak and hole       | 0.276 and -0.193 eÅ <sup>-3</sup>                                                                  |

**Notes:**

C9 and C10 each disordered over 2 sites in a 70:30 ratio. ADP restraints applied to minor fractional atoms to assist convergence.  
Extensive hydrogen-bonding the gross structure – to form sheets parallel to the *ab* plane, which interdigitate as they stack along the *c* axis.

Hydrogen bonds with  $H \cdots A < r(A) + 2.000$  Angstroms and  $\langle DHA \rangle > 110$  deg.

| D-H   | d(D-H) | d(H...A) | $\langle DHA \rangle$ | d(D...A) | A                       |
|-------|--------|----------|-----------------------|----------|-------------------------|
| O3-H3 | 0.820  | 1.973    | 153.53                | 2.732    | O4 [ -x+2, -y+1, -z ]   |
| O4-H4 | 0.820  | 1.916    | 167.84                | 2.724    | O6 [ x+1/2, -y+1/2, z ] |
| O5-H5 | 0.820  | 2.024    | 162.35                | 2.816    | O2 [ x, y-1, z ]        |
| O6-H6 | 0.820  | 2.208    | 132.41                | 2.827    | O5 [ x-1/2, -y+1/2, z ] |
| O6-H6 | 0.820  | 2.411    | 110.14                | 2.801    | O7                      |
| O7-H7 | 0.820  | 1.977    | 172.69                | 2.792    | O3 [ x-1/2, -y+3/2, z ] |



**Table 2.** Atomic coordinates ( $\times 10^4$ ) and equivalent isotropic displacement parameters ( $\text{\AA}^2 \times 10^3$ ) for **7**.  $U(\text{eq})$  is defined as one third of the trace of the orthogonalized  $U_{ij}$  tensor.

| Atom   | x        | y        | z        | $U(\text{eq})$ |
|--------|----------|----------|----------|----------------|
| O(1)   | 8087(1)  | 7094(1)  | 2482(1)  | 35(1)          |
| O(2)   | 7383(2)  | 9403(1)  | 2048(1)  | 60(1)          |
| O(3)   | 9179(1)  | 6817(1)  | 724(1)   | 38(1)          |
| O(4)   | 9628(1)  | 3734(1)  | 882(1)   | 40(1)          |
| O(5)   | 8576(1)  | 2188(1)  | 2402(1)  | 46(1)          |
| O(6)   | 6142(1)  | 3067(1)  | 2425(1)  | 44(1)          |
| O(7)   | 5593(1)  | 6097(1)  | 2190(1)  | 47(1)          |
| C(1)   | 7371(1)  | 6544(2)  | 1407(1)  | 31(1)          |
| C(2)   | 6394(1)  | 5452(2)  | 1606(1)  | 33(1)          |
| C(3)   | 7038(1)  | 4142(2)  | 2289(1)  | 31(1)          |
| C(4)   | 7921(1)  | 3365(2)  | 1727(1)  | 32(1)          |
| C(5)   | 8899(1)  | 4431(2)  | 1519(1)  | 30(1)          |
| C(6)   | 8269(1)  | 5768(2)  | 861(1)   | 30(1)          |
| C(7)   | 7962(2)  | 8521(2)  | 2717(1)  | 41(1)          |
| C(8)   | 8616(2)  | 8875(2)  | 3904(2)  | 58(1)          |
| C(9)   | 7757(3)  | 9738(4)  | 4472(3)  | 69(1)          |
| C(10)  | 6571(5)  | 9075(8)  | 4482(6)  | 84(2)          |
| C(9A)  | 8030(8)  | 8354(10) | 4647(6)  | 68(2)          |
| C(10A) | 6769(14) | 8540(20) | 4597(19) | 100(6)         |

**Table 3.** Bond lengths [ $\text{\AA}$ ] and angles [ $^\circ$ ] for **7**.

|                |            |                |            |
|----------------|------------|----------------|------------|
| O(1)-C(7)      | 1.3380(18) | O(1)-C(1)      | 1.4511(17) |
| O(2)-C(7)      | 1.206(2)   | O(3)-C(6)      | 1.4228(16) |
| O(3)-H(3)      | 0.8200     | O(4)-C(5)      | 1.4244(16) |
| O(4)-H(4)      | 0.8200     | O(5)-C(4)      | 1.4267(18) |
| O(5)-H(5)      | 0.8200     | O(6)-C(3)      | 1.4268(16) |
| O(6)-H(6)      | 0.8200     | O(7)-C(2)      | 1.4162(17) |
| O(7)-H(7)      | 0.8200     | C(1)-C(6)      | 1.5185(19) |
| C(1)-C(2)      | 1.529(2)   | C(1)-H(1)      | 0.9800     |
| C(2)-C(3)      | 1.518(2)   | C(2)-H(2)      | 0.9800     |
| C(3)-C(4)      | 1.5192(19) | C(3)-H(3A)     | 0.9800     |
| C(4)-C(5)      | 1.5187(19) | C(4)-H(4A)     | 0.9800     |
| C(5)-C(6)      | 1.5197(19) | C(5)-H(5A)     | 0.9800     |
| C(6)-H(6A)     | 0.9800     | C(7)-C(8)      | 1.501(2)   |
| C(8)-C(9A)     | 1.354(7)   | C(8)-C(9)      | 1.541(4)   |
| C(8)-H(8A)     | 0.9700     | C(8)-H(8B)     | 0.9700     |
| C(9)-C(10)     | 1.440(6)   | C(9)-H(9A)     | 0.9700     |
| C(9)-H(9B)     | 0.9700     | C(10)-H(10A)   | 0.9600     |
| C(10)-H(10B)   | 0.9600     | C(10)-H(10C)   | 0.9600     |
| C(9A)-C(10A)   | 1.383(14)  | C(9A)-H(9A1)   | 0.9700     |
| C(9A)-H(9A2)   | 0.9700     | C(10A)-H(10D)  | 0.9600     |
| C(10A)-H(10E)  | 0.9600     | C(10A)-H(10F)  | 0.9600     |
|                |            |                |            |
| C(7)-O(1)-C(1) | 118.17(12) | C(6)-O(3)-H(3) | 109.5      |
| C(5)-O(4)-H(4) | 109.5      | C(4)-O(5)-H(5) | 109.5      |
| C(3)-O(6)-H(6) | 109.5      | C(2)-O(7)-H(7) | 109.5      |
| O(1)-C(1)-C(6) | 108.70(11) | O(1)-C(1)-C(2) | 107.32(11) |
| C(6)-C(1)-C(2) | 110.38(11) | O(1)-C(1)-H(1) | 110.1      |
| C(6)-C(1)-H(1) | 110.1      | C(2)-C(1)-H(1) | 110.1      |
| O(7)-C(2)-C(3) | 106.79(12) | O(7)-C(2)-C(1) | 112.52(12) |
| C(3)-C(2)-C(1) | 110.73(11) | O(7)-C(2)-H(2) | 108.9      |
| C(3)-C(2)-H(2) | 108.9      | C(1)-C(2)-H(2) | 108.9      |
| O(6)-C(3)-C(2) | 111.47(12) | O(6)-C(3)-C(4) | 106.92(11) |

|                      |            |                          |            |
|----------------------|------------|--------------------------|------------|
| C(2)-C(3)-C(4)       | 110.92(12) | O(6)-C(3)-H(3A)          | 109.2      |
| C(2)-C(3)-H(3A)      | 109.2      | C(4)-C(3)-H(3A)          | 109.2      |
| O(5)-C(4)-C(5)       | 107.85(11) | O(5)-C(4)-C(3)           | 110.67(12) |
| C(5)-C(4)-C(3)       | 111.09(11) | O(5)-C(4)-H(4A)          | 109.1      |
| C(5)-C(4)-H(4A)      | 109.1      | C(3)-C(4)-H(4A)          | 109.1      |
| O(4)-C(5)-C(4)       | 110.52(11) | O(4)-C(5)-C(6)           | 106.84(11) |
| C(4)-C(5)-C(6)       | 110.89(11) | O(4)-C(5)-H(5A)          | 109.5      |
| C(4)-C(5)-H(5A)      | 109.5      | C(6)-C(5)-H(5A)          | 109.5      |
| O(3)-C(6)-C(1)       | 108.20(11) | O(3)-C(6)-C(5)           | 111.28(11) |
| C(1)-C(6)-C(5)       | 112.29(11) | O(3)-C(6)-H(6A)          | 108.3      |
| C(1)-C(6)-H(6A)      | 108.3      | C(5)-C(6)-H(6A)          | 108.3      |
| O(2)-C(7)-O(1)       | 123.38(15) | O(2)-C(7)-C(8)           | 124.67(15) |
| O(1)-C(7)-C(8)       | 111.95(15) | C(9A)-C(8)-C(7)          | 114.8(4)   |
| C(9A)-C(8)-C(9)      | 52.5(4)    | C(7)-C(8)-C(9)           | 112.16(19) |
| C(9A)-C(8)-H(8A)     | 136.0      | C(7)-C(8)-H(8A)          | 109.2      |
| C(9)-C(8)-H(8A)      | 109.2      | C(9A)-C(8)-H(8B)         | 58.7       |
| C(7)-C(8)-H(8B)      | 109.2      | C(9)-C(8)-H(8B)          | 109.2      |
| H(8A)-C(8)-H(8B)     | 107.9      | C(10)-C(9)-C(8)          | 117.8(4)   |
| C(10)-C(9)-H(9A)     | 107.9      | C(8)-C(9)-H(9A)          | 107.9      |
| C(10)-C(9)-H(9B)     | 107.9      | C(8)-C(9)-H(9B)          | 107.9      |
| H(9A)-C(9)-H(9B)     | 107.2      | C(9)-C(10)-H(10A)        | 109.5      |
| C(9)-C(10)-H(10B)    | 109.5      | H(10A)-C(10)-H(10B)      | 109.5      |
| C(9)-C(10)-H(10C)    | 109.5      | H(10A)-C(10)-H(10C)      | 109.5      |
| H(10B)-C(10)-H(10C)  | 109.5      | C(8)-C(9A)-C(10A)        | 126.0(11)  |
| C(8)-C(9A)-H(9A1)    | 105.8      | C(10A)-C(9A)-H(9A1)      | 105.8      |
| C(8)-C(9A)-H(9A2)    | 105.8      | C(10A)-C(9A)-H(9A2)      | 105.8      |
| H(9A1)-C(9A)-H(9A2)  | 106.2      | C(9A)-C(10A)-H(10D)      | 109.5      |
| C(9A)-C(10A)-H(10E)  | 109.5      | H(10D)-C(10A)-<br>H(10E) | 109.5      |
| C(9A)-C(10A)-H(10F)  | 109.5      | H(10D)-C(10A)-<br>H(10F) | 109.5      |
| H(10E)-C(10A)-H(10F) | 109.5      |                          |            |

Symmetry transformations used to generate equivalent atoms

**Table 4.** Anisotropic displacement parameters ( $\text{\AA}^2 \times 10^3$ ) for **7**. The anisotropic displacement factor exponent takes the form:  
 $-2 \text{ gpi}^2 [ h^2 a^{*2} U_{11} + \dots + 2 h k a^* b^* U_{12}$

| Atom   | U11    | U22    | U33   | U23    | U13   | U12    |
|--------|--------|--------|-------|--------|-------|--------|
| O(1)   | 39(1)  | 27(1)  | 39(1) | -4(1)  | 9(1)  | 1(1)   |
| O(2)   | 78(1)  | 27(1)  | 68(1) | -2(1)  | 11(1) | 6(1)   |
| O(3)   | 42(1)  | 29(1)  | 52(1) | 1(1)   | 26(1) | -3(1)  |
| O(4)   | 41(1)  | 38(1)  | 50(1) | 5(1)   | 26(1) | 10(1)  |
| O(5)   | 41(1)  | 27(1)  | 75(1) | 13(1)  | 25(1) | 4(1)   |
| O(6)   | 37(1)  | 35(1)  | 68(1) | -3(1)  | 28(1) | -8(1)  |
| O(7)   | 42(1)  | 46(1)  | 62(1) | 8(1)   | 29(1) | 14(1)  |
| C(1)   | 31(1)  | 28(1)  | 35(1) | -1(1)  | 10(1) | 3(1)   |
| C(2)   | 27(1)  | 34(1)  | 40(1) | -2(1)  | 12(1) | 2(1)   |
| C(3)   | 29(1)  | 27(1)  | 41(1) | -2(1)  | 15(1) | -4(1)  |
| C(4)   | 31(1)  | 24(1)  | 43(1) | -2(1)  | 14(1) | -1(1)  |
| C(5)   | 28(1)  | 27(1)  | 37(1) | -1(1)  | 13(1) | 0(1)   |
| C(6)   | 31(1)  | 26(1)  | 35(1) | 0(1)   | 13(1) | -1(1)  |
| C(7)   | 42(1)  | 30(1)  | 53(1) | -8(1)  | 17(1) | -1(1)  |
| C(8)   | 57(1)  | 53(1)  | 59(1) | -22(1) | 8(1)  | 0(1)   |
| C(9)   | 87(2)  | 62(2)  | 62(2) | -16(2) | 29(2) | -1(2)  |
| C(10)  | 68(3)  | 112(5) | 75(3) | -8(3)  | 25(2) | 4(3)   |
| C(9A)  | 83(4)  | 74(4)  | 47(3) | -6(3)  | 18(3) | -16(3) |
| C(10A) | 104(7) | 107(7) | 95(7) | -3(5)  | 39(5) | -17(5) |

**Table 5.** Hydrogen coordinates ( $\times 10^4$ ) and isotropic displacement parameters ( $\text{\AA}^2 \times 10^3$ ) for **7**.

| Atom   | x     | y     | z    | U(eq) |
|--------|-------|-------|------|-------|
| H(3)   | 9636  | 6434  | 384  | 46    |
| H(4)   | 10146 | 3178  | 1280 | 48    |
| H(5)   | 8107  | 1470  | 2345 | 55    |
| H(6)   | 5548  | 3486  | 2575 | 53    |
| H(7)   | 5133  | 6709  | 1794 | 56    |
| H(1)   | 6948  | 7366  | 941  | 37    |
| H(2)   | 5877  | 5090  | 888  | 40    |
| H(3A)  | 7524  | 4494  | 3020 | 37    |
| H(4A)  | 7426  | 2959  | 1017 | 38    |
| H(5A)  | 9457  | 4758  | 2230 | 35    |
| H(6A)  | 7786  | 5429  | 125  | 36    |
| H(8A)  | 9365  | 9458  | 3934 | 69    |
| H(8B)  | 8883  | 7961  | 4305 | 69    |
| H(9A)  | 8231  | 9918  | 5234 | 82    |
| H(9B)  | 7580  | 10695 | 4112 | 82    |
| H(10A) | 6133  | 9716  | 4864 | 125   |
| H(10B) | 6722  | 8138  | 4856 | 125   |
| H(10C) | 6066  | 8930  | 3734 | 125   |
| H(9A1) | 8499  | 8749  | 5360 | 82    |
| H(9A2) | 8176  | 7294  | 4684 | 82    |
| H(10D) | 6587  | 8040  | 5212 | 149   |
| H(10E) | 6256  | 8131  | 3916 | 149   |
| H(10F) | 6588  | 9575  | 4629 | 149   |

**Table 6.** Dihedral angles [°] for **7**.

| Atom1 - Atom2 - Atom3 - Atom4 | Dihedral    |
|-------------------------------|-------------|
| C(7) - O(1) - C(1) - C(6)     | 127.75(13)  |
| C(7) - O(1) - C(1) - C(2)     | -112.86(14) |
| O(1) - C(1) - C(2) - O(7)     | 57.17(15)   |
| C(6) - C(1) - C(2) - O(7)     | 175.47(12)  |
| O(1) - C(1) - C(2) - C(3)     | -62.26(14)  |
| C(6) - C(1) - C(2) - C(3)     | 56.04(15)   |
| O(7) - C(2) - C(3) - O(6)     | 60.76(15)   |
| C(1) - C(2) - C(3) - O(6)     | -176.42(11) |
| O(7) - C(2) - C(3) - C(4)     | 179.80(11)  |
| C(1) - C(2) - C(3) - C(4)     | -57.38(15)  |
| O(6) - C(3) - C(4) - O(5)     | -61.53(15)  |
| C(2) - C(3) - C(4) - O(5)     | 176.74(11)  |
| O(6) - C(3) - C(4) - C(5)     | 178.70(12)  |
| C(2) - C(3) - C(4) - C(5)     | 56.96(15)   |
| O(5) - C(4) - C(5) - O(4)     | 65.15(15)   |
| C(3) - C(4) - C(5) - O(4)     | -173.40(11) |
| O(5) - C(4) - C(5) - C(6)     | -176.55(12) |
| C(3) - C(4) - C(5) - C(6)     | -55.11(16)  |
| O(1) - C(1) - C(6) - O(3)     | -60.86(14)  |
| C(2) - C(1) - C(6) - O(3)     | -178.32(11) |
| O(1) - C(1) - C(6) - C(5)     | 62.36(15)   |
| C(2) - C(1) - C(6) - C(5)     | -55.10(15)  |
| O(4) - C(5) - C(6) - O(3)     | -63.27(14)  |
| C(4) - C(5) - C(6) - O(3)     | 176.23(11)  |
| O(4) - C(5) - C(6) - C(1)     | 175.26(11)  |
| C(4) - C(5) - C(6) - C(1)     | 54.76(16)   |
| C(1) - O(1) - C(7) - O(2)     | -7.2(2)     |
| C(1) - O(1) - C(7) - C(8)     | 172.23(14)  |
| O(2) - C(7) - C(8) - C(9A)    | 106.3(5)    |
| O(1) - C(7) - C(8) - C(9A)    | -73.2(5)    |

|                              |           |
|------------------------------|-----------|
| O(2) - C(7) - C(8) - C(9)    | 48.7(3)   |
| O(1) - C(7) - C(8) - C(9)    | -130.7(2) |
| C(9A) - C(8) - C(9) - C(10)  | -47.9(5)  |
| C(7) - C(8) - C(9) - C(10)   | 57.0(5)   |
| C(7) - C(8) - C(9A) - C(10A) | -50.3(14) |
| C(9) - C(8) - C(9A) - C(10A) | 49.5(12)  |

Symmetry transformations used to generate equivalent atoms

## Computational Data for Compound 20

Methods:-

The Schrödinger software was used to build and minimise the structure below.

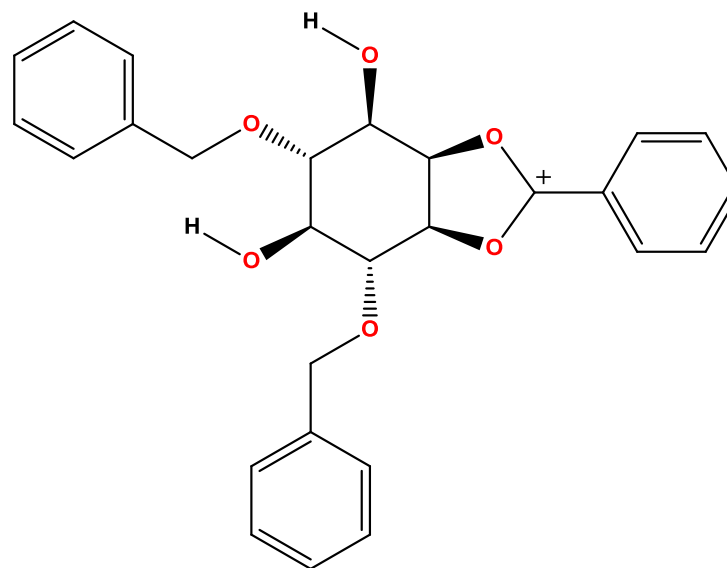

The Impact module of the Schrödinger software was used for a number of dynamics runs of 10,000 steps of 0.001 picoseconds at temperatures ranging from 276.15K to 3,276.15K. (This range of temperatures was used in an effort to generate a wide range of conformations in a reasonable length of time.) Every fifth structure, i.e. 2,000 structures, from each dynamics run was saved. Every fifth structure, i.e. 400 structures, from those saved had the coupling constants calculated by the Schrödinger software. These were studied to determine for which structures the



calculated coupling constants most closely matched the observed coupling constants. From a preliminary scan seven structures were selected. These structures and the ten structures either side of these were studied in detail. The results for the structure that most closely matched the observed results are shown below in Table 1.

**Table 1** Comparison of observed and calculated coupling constants for Dioxolenium ion **20**

|                          | <b>1,2</b> | <b>2,3</b> | <b>3,4</b> | <b>4,5</b> | <b>5,6</b> | <b>6,1</b> |
|--------------------------|------------|------------|------------|------------|------------|------------|
| <i>J</i> <sub>Obs</sub>  | 9.0        | 2.9-3.4    | 4.0        | 3.7        | 8.7        | 6.0        |
| <i>J</i> <sub>Calc</sub> | 7.4        | 5.9        | 2.7        | 1.1        | 9.8        | 5.5        |
| <b>Dihedral</b>          | 7.03       | -26.10     | -70.70     | 122.14     | 172.32     | 151.58     |

Figure 11 below shows the gross conformation of the hexane ring. The 1,6 bond is horizontal in the foreground and C2 is directly behind C1. For the sake of clarity the aromatic rings are shown as lines in a different colour. The Figure 12 shows the dihedral angles. Figure 13 and Figure 14 are different views of the compound.

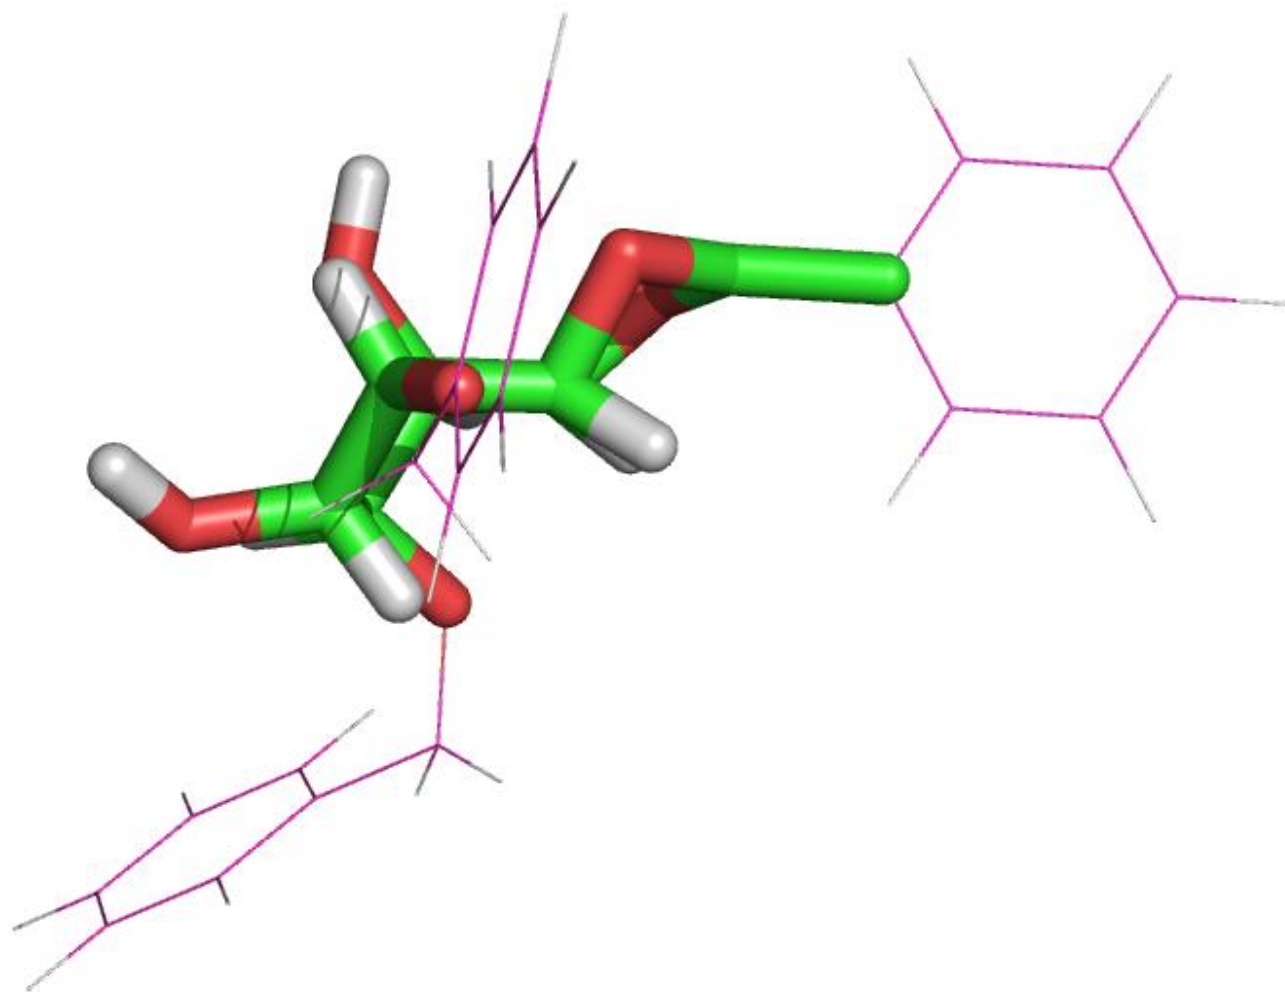

**Figure 11**

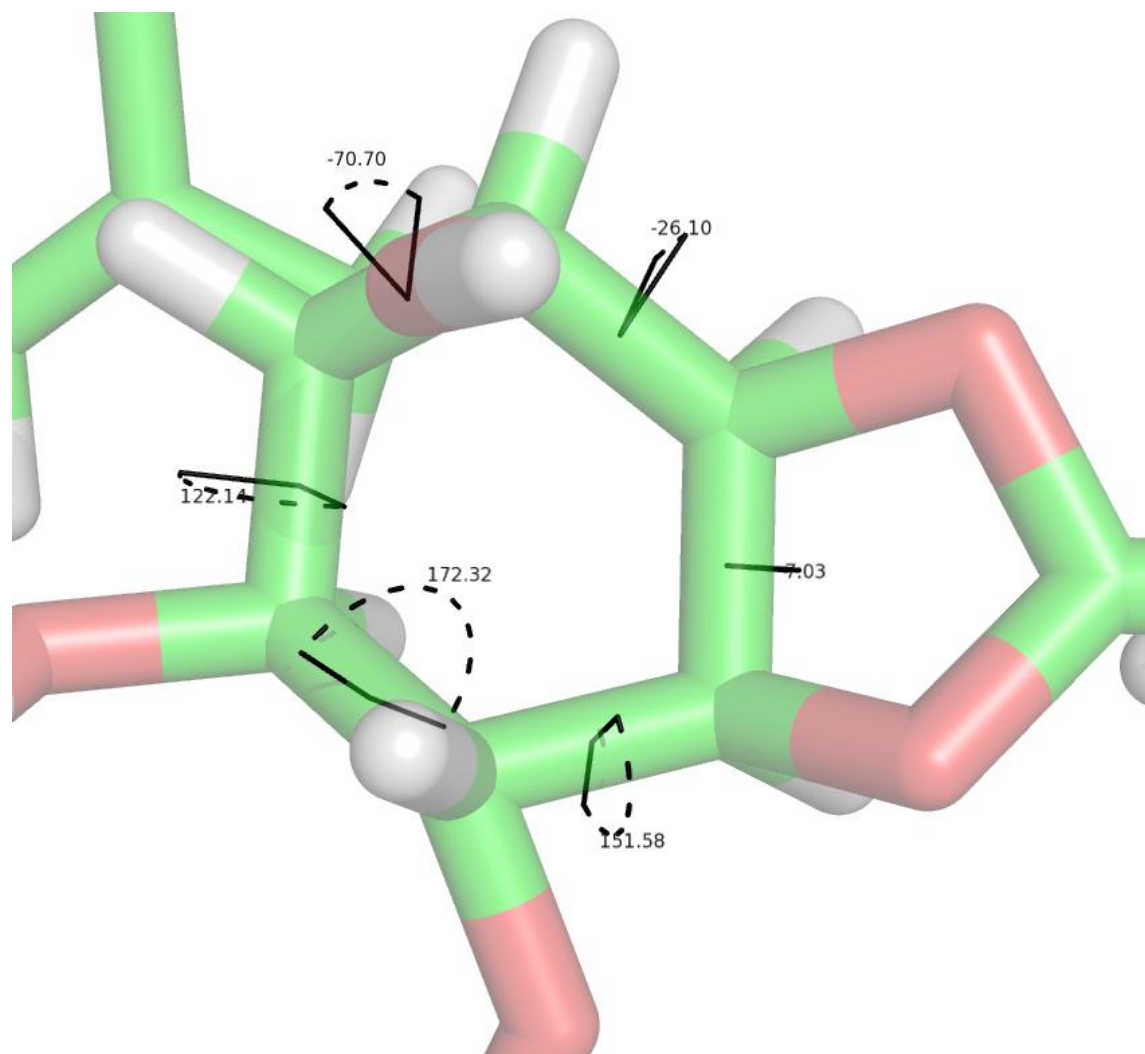

**Figure 12**

S51

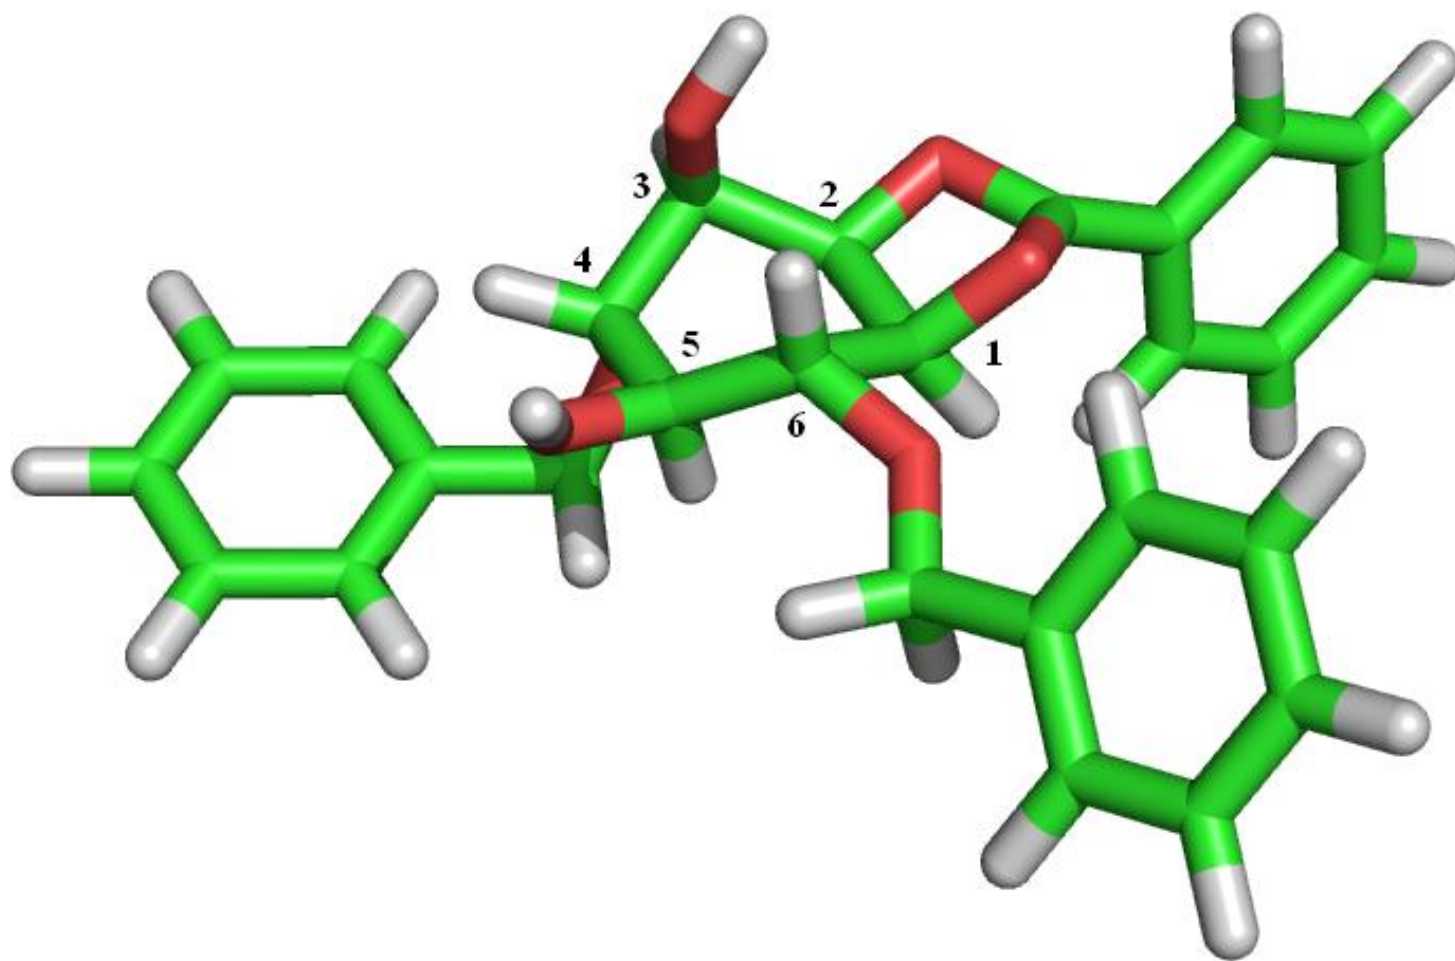

**Figure 13**

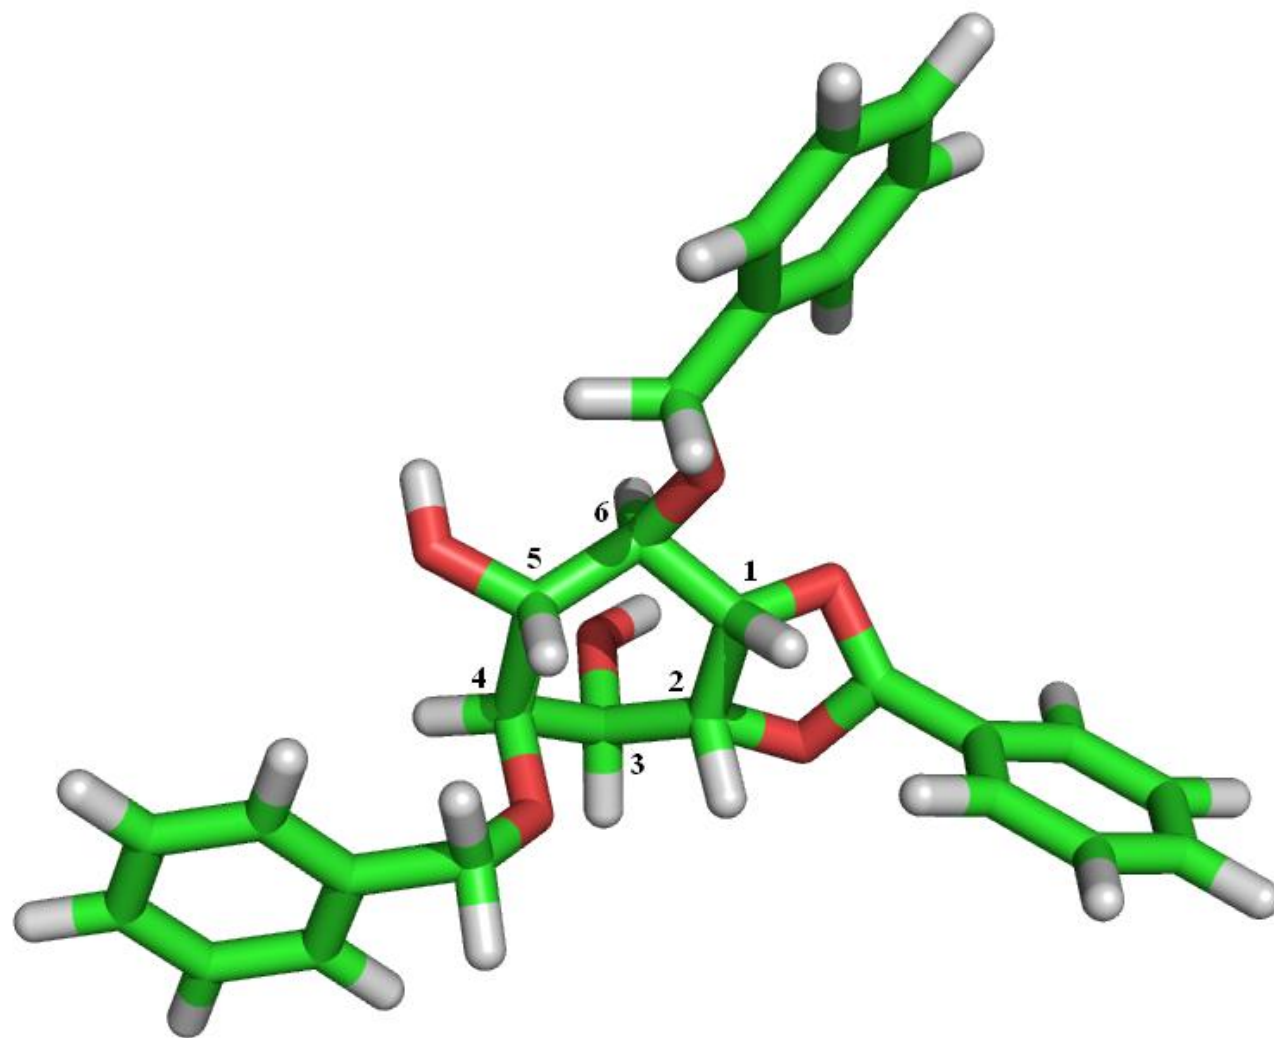

**Figure 14**

S53
